# Supplementary material for: Crystallographic evidence for a continuum and reversal of roles in primary–secondary interactions in antimony Lewis acids: applications in carbonyl activation
Source: Royal Society of Chemistry journal article supplement (doi:10.1039/d2cc04027a), 2022-01-01
Supplement: d2cc04027a1.pdf [file d2cc04027a1.pdf]

## Supporting Information

for

# **Crystallographic evidence for continuum and reversal of roles in primary-secondary interactions in antimony Lewis acids: Applications in carbonyl activation**

Deepti Sharma, <sup>a</sup> Annabel Benny, <sup>a</sup> Radhika Gupta, <sup>b</sup> Eluvathingal D. Jemmis <sup>\*b</sup> and Ajay Venugopal <sup>\*a</sup>

<sup>[a]</sup> School of Chemistry, Indian Institute of Science Education and Research Thiruvananthapuram, Vithura, Thiruvananthapuram 695551, India.

<sup>[b]</sup> Department of Inorganic and Physical Chemistry, Indian Institute of Science, Bangalore 560012, India

# Table of Contents

## 1. General Methods

## 2. Experimental Procedures

### 2.1 Synthesis and characterization

Synthesis and characterization of **1A**

Synthesis and characterization of **2A**

Synthesis and characterization of **3A**

Synthesis and characterization of **4A**

Synthesis and characterization of **1B**

Synthesis and characterization of **2B**

Synthesis and characterization of **3B**

Synthesis and characterization of **4B**

### 2.2 Solution NMR Studies for Carbonyl Activation

### 2.3 Reactivity Studies

Catalytic hydrosilylation of benzaldehyde

Catalytic deoxygenation of benzophenone

Carbonyl olefin metatheses

## 3. Crystallographic Data

## 4. Computational Details

## 5. References

## 1. General Methods

*Synthesis:* All the reaction procedures were carried out in argon atmosphere using standard glovebox and Schlenk line techniques. <sup>[1]</sup> All the glassware were dried at 200 °C before use. Dichloromethane, *n*-pentane, C<sub>6</sub>D<sub>5</sub>-Br and CD<sub>2</sub>Cl<sub>2</sub> were dried over CaH<sub>2</sub>. Na/Ph<sub>2</sub>CO was used as a drying agent for toluene, diethyl ether (Et<sub>2</sub>O) and tetrahydrofuran (THF).<sup>[2]</sup> The solvents were then distilled, degassed and stored over LiAlH<sub>4</sub> (toluene, *n*-pentane, THF), CaH<sub>2</sub> (CH<sub>2</sub>Cl<sub>2</sub>, CD<sub>2</sub>Cl<sub>2</sub>) and 3 Å molecular sieves (C<sub>6</sub>D<sub>5</sub>-Br) at least a day prior to the use. Thereafter, the solvents were directly condensed into the reaction flask at -196 °C. Anhydrous SbCl<sub>3</sub>, Et<sub>3</sub>PO, AgPF<sub>6</sub> and AgOTf were purchased from Sigma-Aldrich. Et<sub>3</sub>PO, AgPF<sub>6</sub> and AgOTf were directly taken into glovebox and used in experiments without any further purification. SbCl<sub>3</sub> was purified by sublimation and stored in glovebox. (mesityl)Li<sup>[3]</sup>, [(NMe<sub>2</sub>)CH<sub>2</sub>C<sub>6</sub>H<sub>4</sub>Li]<sup>[4]</sup>, [(NMe<sub>2</sub>)C<sub>6</sub>H<sub>4</sub>Li]<sup>[4]</sup>, ((NMe<sub>2</sub>)CH<sub>2</sub>C<sub>6</sub>H<sub>4</sub>)SbCl<sub>2</sub><sup>[5]</sup>, [Ag(CH<sub>2</sub>Cl<sub>2</sub>)<sub>2</sub>][Al(OC(CF<sub>3</sub>)<sub>3</sub>)<sub>4</sub>]<sup>[6]</sup> and [Ag(CH<sub>3</sub>CN)<sub>2</sub>][B(C<sub>6</sub>H<sub>3</sub>Cl<sub>2</sub>)<sub>4</sub>]<sup>[7]</sup> were prepared according to the reported literature procedures. 2-Bromomesitylene, N, N-dimethylphenylamine and N, N-dimethylbenzylamine were procured from Sigma-Aldrich. They were dried over CaH<sub>2</sub> and stored over 3 Å molecular sieves before use.<sup>[2]</sup> Percentage yields are reported for the crystallized products.

*Characterization:* <sup>1</sup>H, <sup>13</sup>C{<sup>1</sup>H}, <sup>19</sup>F and <sup>31</sup>P{<sup>1</sup>H} NMR spectra were recorded on Bruker Avance III 500 MHz spectrometer at ambient temperature. The chemical shifts (δ ppm) in <sup>1</sup>H and <sup>13</sup>C{<sup>1</sup>H} NMR spectra were referenced to the residual signals of the deuterated solvents. <sup>19</sup>F and <sup>31</sup>P{<sup>1</sup>H} NMR spectra were referenced to CFCl<sub>3</sub> and H<sub>3</sub>PO<sub>4</sub> (85%) respectively. Abbreviations for NMR spectra: s (singlet), br (broad), m (multiplet). Elemental analyses were performed on samples, well dried at 1×10<sup>-3</sup> mbar at ambient temperature, on Elemental Vario Micro Cube instrument.

## 2. Experimental Procedures

### 2.1 Synthesis and Characterization

#### Synthesis and characterization of **1A**:

A 30 mL toluene solution of (mesityl)Li (0.077 g, 0.611 mmol) was added dropwise to a 20 mL toluene solution of ((NMe<sub>2</sub>)CH<sub>2</sub>C<sub>6</sub>H<sub>4</sub>)SbCl<sub>2</sub> (0.200 g, 0.611 mmol) at -78 °C. The reaction was allowed to attain ambient temperature and stirred for 20 h. The reaction mixture was filtered and toluene was distilled off. The white powder was dissolved in 2 mL dichloromethane layered with *n*-pentane. Colorless crystals of **1A** were obtained after one day at -30 °C.

Yield: 0.19 g, 76%

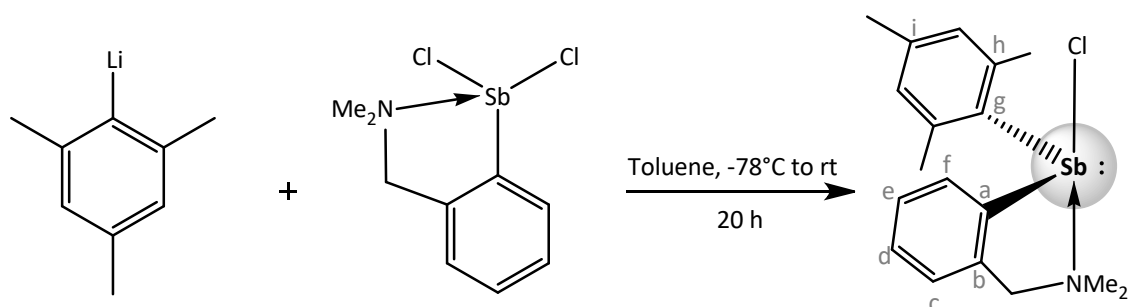

**Scheme S1**

Elemental analysis for C<sub>18</sub>H<sub>23</sub>NSbCl: C, 52.65; H, 5.65; N, 3.41. Found: C, 52.62; H, 5.57; N, 3.38

<sup>1</sup>H NMR (CD<sub>2</sub>Cl<sub>2</sub>, 500 MHz): δ 1.96 (s, br, 3H, *o*-CH<sub>3</sub>), 2.10 (s, 3H, NMe<sub>2</sub>), 2.24 (s, 3H, *p*-CH<sub>3</sub>), 2.35 (s, 3H, NMe<sub>2</sub>), 2.69 (3H, s, br, *o*-CH<sub>3</sub>), AB spin system with A at 3.46, 3.48 (d, 1H, CH<sub>2</sub>, <sup>3</sup>J<sub>HH</sub> = 14.0 Hz) and B at 3.69, 3.71 (d, 1H, CH<sub>2</sub>, <sup>3</sup>J<sub>HH</sub> = 14.0 Hz), 6.85 (s, br, 2H, *m*-H(C<sub>6</sub>H<sub>11</sub>)), 7.21 (d, 1H, *o*-C<sub>6</sub>H<sub>4</sub>, <sup>3</sup>J<sub>HH</sub> = 7.4 Hz), 7.34 (t, 1H, C<sub>6</sub>H<sub>4</sub>, <sup>3</sup>J<sub>HH</sub> = 7.4 Hz), 7.40 (t, 1H, C<sub>6</sub>H<sub>4</sub>, <sup>3</sup>J<sub>HH</sub> = 7.3 Hz), 8.41 (d, 1H, *m*-C<sub>6</sub>H<sub>4</sub>, <sup>3</sup>J<sub>HH</sub> = 7.3 Hz)

<sup>13</sup>C{<sup>1</sup>H} NMR (CD<sub>2</sub>Cl<sub>2</sub>, 125 MHz): δ 20.7 (*p*-CH<sub>3</sub>), 25.2 (*o*-CH<sub>3</sub>), 45.4 (NMe<sub>2</sub>), 66.3 (CH<sub>2</sub>NMe<sub>2</sub>), 126.2 (c, C<sub>6</sub>H<sub>4</sub>), 128.4 (d, C<sub>6</sub>H<sub>4</sub>), 128.8 (*m*-CH, C<sub>9</sub>H<sub>11</sub>), 129.0 (e, C<sub>6</sub>H<sub>4</sub>), 136.2 (g, C<sub>9</sub>H<sub>11</sub>), 139.2 (i, C<sub>6</sub>H<sub>11</sub>), 141.5 (b, C<sub>6</sub>H<sub>4</sub>), 142.9 (f, C<sub>6</sub>H<sub>4</sub>), 145.8 (a, C<sub>6</sub>H<sub>4</sub>, h, C<sub>6</sub>H<sub>11</sub>)

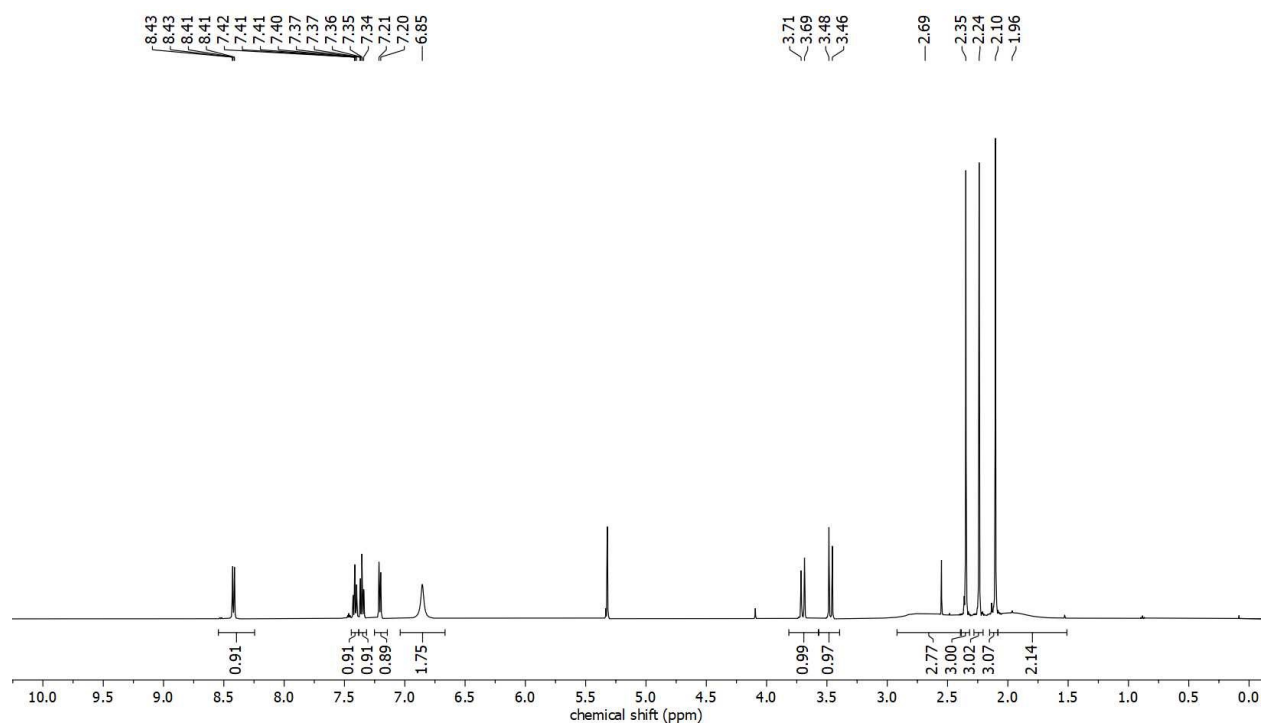

Figure S1:  $^1\text{H}$  NMR spectrum of **1A** recorded in  $\text{CD}_2\text{Cl}_2$ .

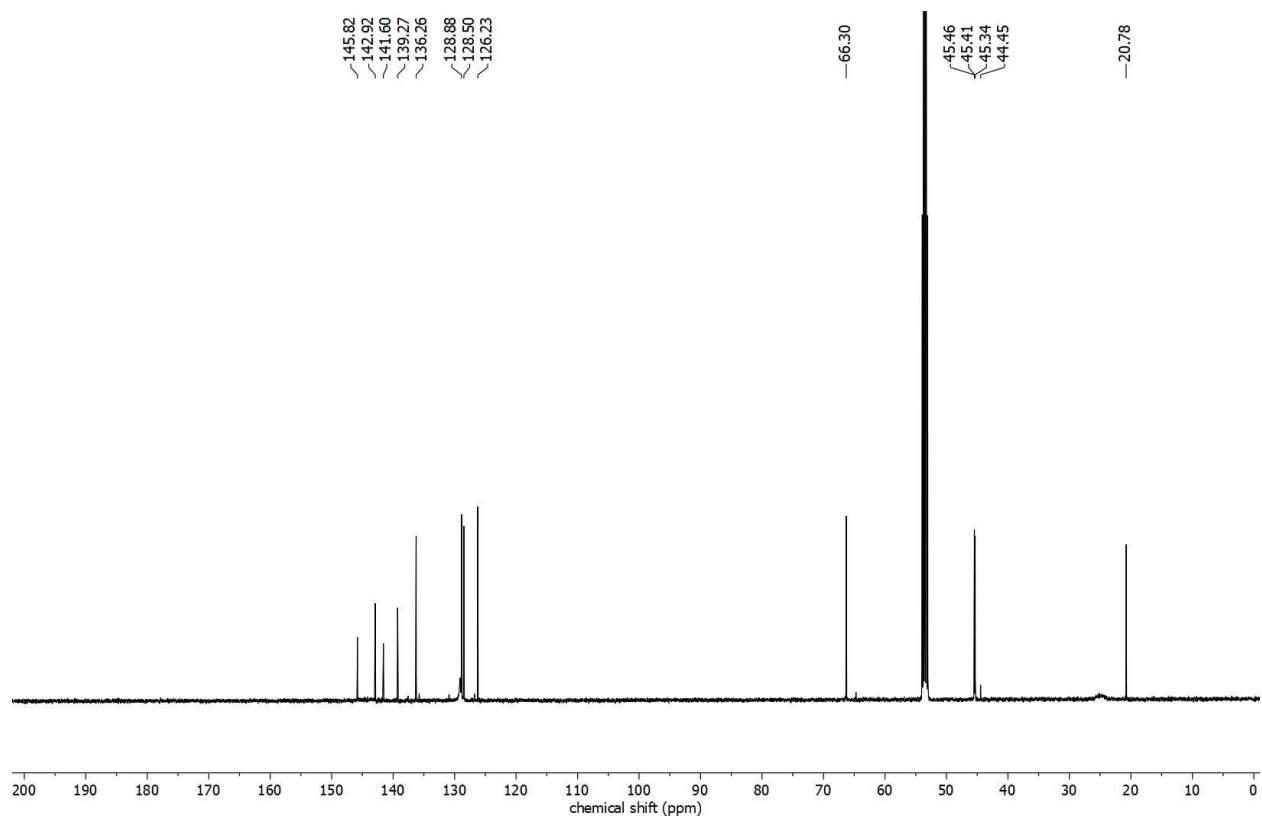

Figure S2:  $^{13}\text{C}\{^1\text{H}\}$  NMR spectrum of **1A** recorded in  $\text{CD}_2\text{Cl}_2$ .

## Synthesis and characterization of 2A:

**1A** (0.035 g, 0.085 mmol),  $\text{O}=\text{PEt}_3$  (0.011 g, 0.085 mmol) and  $[\text{Ag}(\text{CH}_3\text{CN})_2][\text{B}(\text{C}_6\text{H}_3\text{Cl}_2)_4]$  (0.070 g, 0.085 mmol) were loaded into a Schlenk flask. Dichloromethane (5 mL) was condensed on to the mixture at  $-78^\circ\text{C}$ . The reaction mixture was allowed to attain room temperature and stirred for 3 h. Thereafter, filtration of the reaction mixture gave a colorless solution. The solution was concentrated to 1.5 mL, layered with *n*-pentane and stored at  $-30^\circ\text{C}$  to obtain colorless crystals of **2A**.

Yield: 0.087 g, 61%

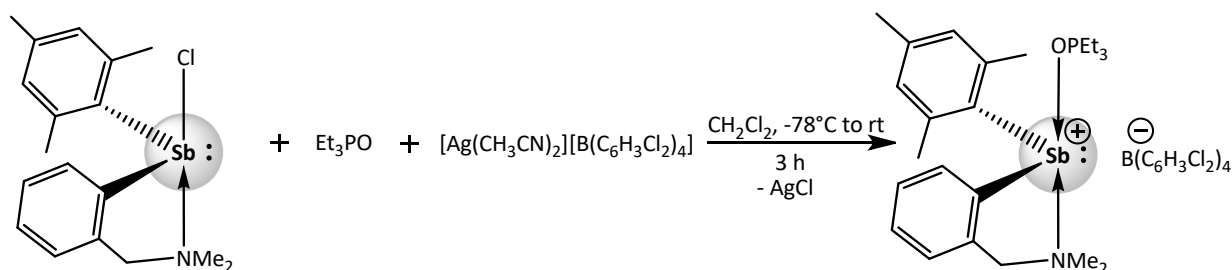

Scheme S2

Elemental analysis for  $\text{C}_{48}\text{H}_{50}\text{BNOPCl}_8\text{Sb}$ : C, 55.22; H, 4.56; N, 1.27. Found: C, 55.18; H, 4.46; N, 1.29

$^1\text{H}$  NMR ( $\text{CD}_2\text{Cl}_2$ , 500 MHz):  $\delta$  1.03 (m, 9H,  $\text{Et}_3\text{PO}$ ,  $\text{CH}_3$ ), 1.68 (m, 6H,  $\text{Et}_3\text{PO}$ ,  $\text{CH}_2$ ),  $\delta$  1.82 (s, br, 3H, *o*- $\text{CH}_3$ ), 2.25 (s, 3H, *p*- $\text{CH}_3$ ), 2.29 (s, 3H,  $\text{NMe}_2$ ), 2.49 (s, 3H,  $\text{NMe}_2$ ), 2.75 (3H, s, br, *o*- $\text{CH}_3$ ), AB spin system with A at 3.65, 3.68 (d, 1H,  $\text{CH}_2$ ,  $^3J_{\text{HH}} = 14.3$  Hz) and B at 3.84, 3.87 (d, 1H,  $\text{CH}_2$ ,  $^3J_{\text{HH}} = 14.3$  Hz), 6.84 (s, br, 2H, *m*- $\text{H}(\text{C}_6\text{H}_{11})$ ), 7.29 (d, 1H, *o*- $\text{C}_6\text{H}_4$ ,  $^3J_{\text{HH}} = 7.1$  Hz), 7.44 (m, 2H,  $\text{C}_6\text{H}_4$ ,  $^3J_{\text{HH}} = 7.4$  Hz), 7.94 (d, 1H, *m*- $\text{C}_6\text{H}_4$ ,  $^3J_{\text{HH}} = 7.1$  Hz)

$^{13}\text{C}\{^1\text{H}\}$  NMR ( $\text{CD}_2\text{Cl}_2$ , 125 MHz):  $\delta$  5.2 ( $\text{OPEt}_3$ ,  $\text{CH}_3$ ), 18.8 (s,  $\text{OPEt}_3$ ,  $\text{CH}_2$ ),  $\delta$  20.8 (*p*- $\text{CH}_3$ ), 25.6 (*o*- $\text{CH}_3$ ), 45.9 ( $\text{NMe}_2$ ), 67.4 ( $\text{CH}_2\text{NMe}_2$ ), 126.6 (c,  $\text{C}_6\text{H}_4$ ), 129.1 (d,  $\text{C}_6\text{H}_4$ ), 129.6 (*m*-CH,  $\text{C}_9\text{H}_{11}$ ), 130.0 (e,  $\text{C}_6\text{H}_4$ ), 134.7 (g,  $\text{C}_9\text{H}_{11}$ ), 141.0 (i,  $\text{C}_9\text{H}_{11}$ ), 142.5 (b,  $\text{C}_6\text{H}_4$ ), 143.1 (f,  $\text{C}_6\text{H}_4$ ), 145.2 (a,  $\text{C}_6\text{H}_4$ , h,  $\text{C}_9\text{H}_{11}$ ), 133.1 (*m*-CH,  $\text{BAR}^{\text{Cl}_2}_4$ ), 132.9 (q,  $^3J_{\text{BC}} = 4.5$  Hz,  $\text{BAR}^{\text{Cl}_2}_4$ ), 123.0 (*p*-CH,  $\text{BAR}^{\text{Cl}_2}_4$ ), 164.1 (q,  $^1J_{\text{BC}} = 49.2$  Hz,  $\text{BAR}^{\text{Cl}_2}_4$ )

$^{11}\text{B}$  NMR ( $\text{CD}_2\text{Cl}_2$ , 160 MHz):  $\delta$  -6.9 (s,  $\text{B}(\text{C}_6\text{H}_3\text{Cl}_2)_4$ )

$^{31}\text{P}\{^1\text{H}\}$  NMR ( $\text{CD}_2\text{Cl}_2$ , 202 MHz):  $\delta$  71.4 (s,  $\text{OPEt}_3$ )

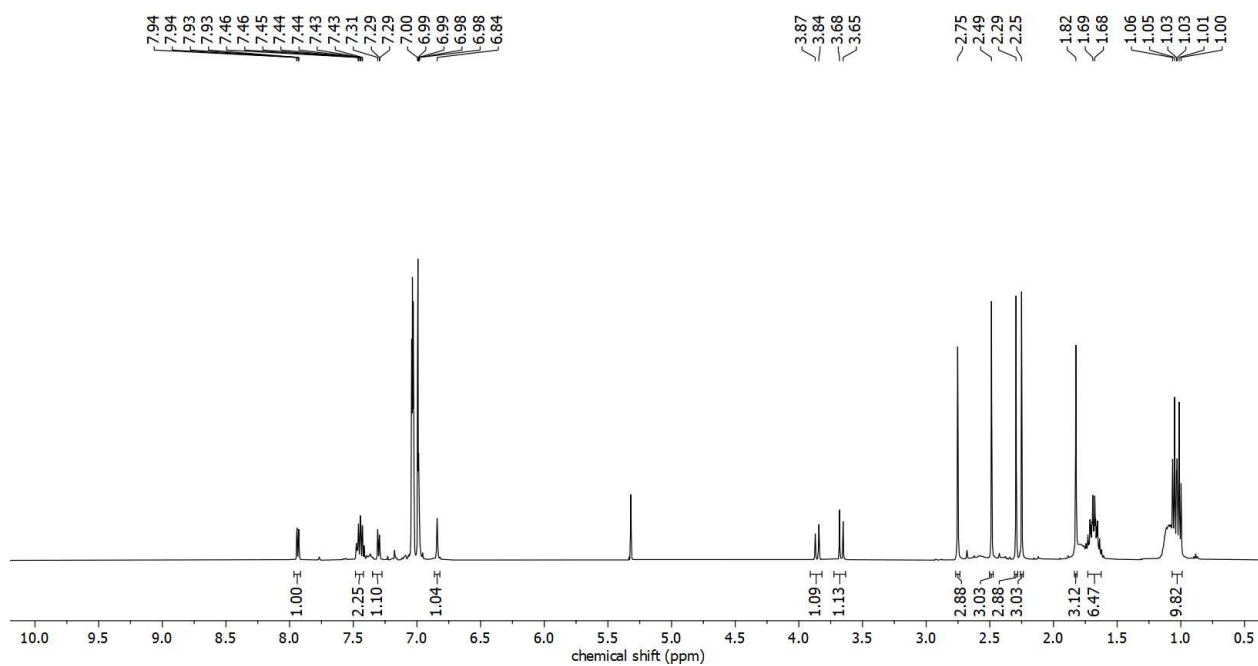

Figure S3:  $^1\text{H}$  NMR spectrum of **2A** recorded in  $\text{CD}_2\text{Cl}_2$ .

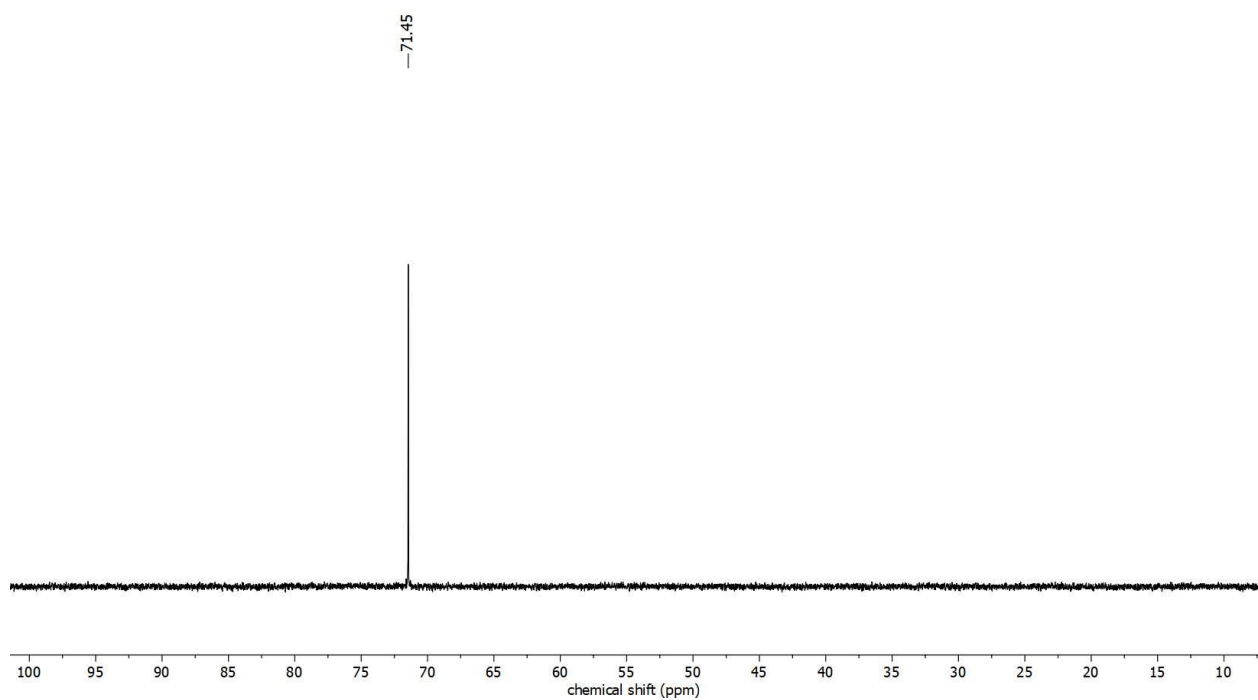

Figure S4:  $^{31}\text{P}\{^1\text{H}\}$  NMR spectrum of **2A** recorded in  $\text{CD}_2\text{Cl}_2$ .

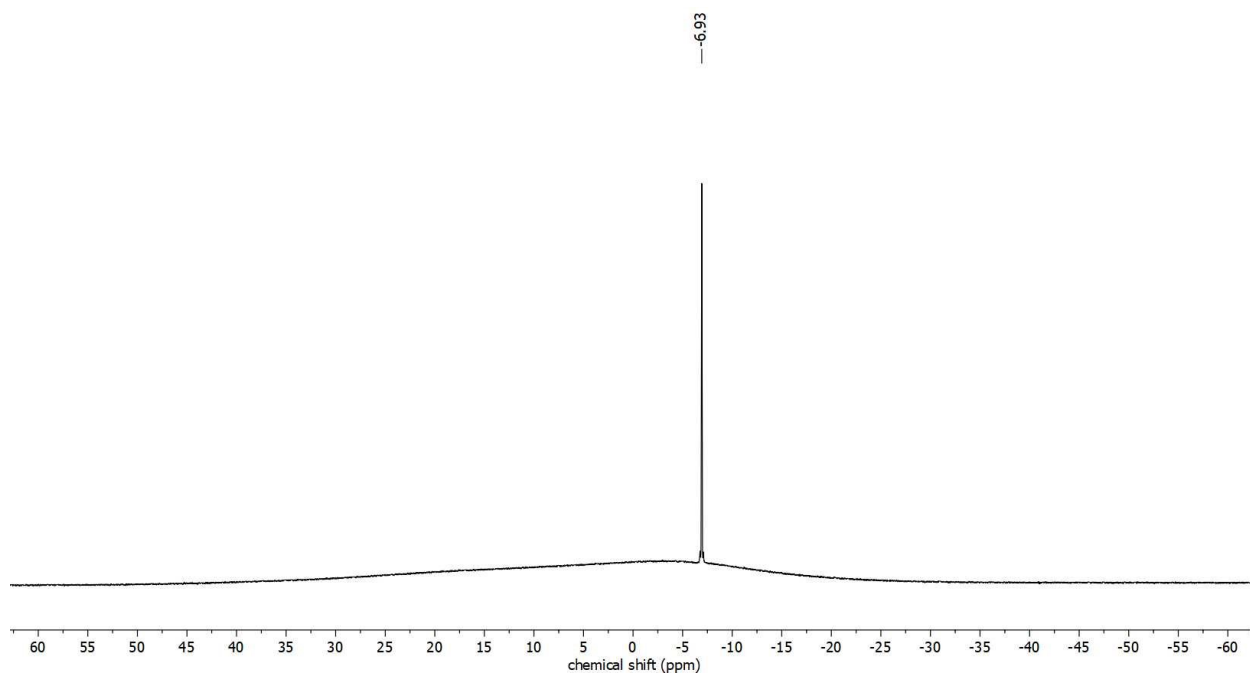

Figure S5:  $^{11}\text{B}$  NMR spectrum of **2A** recorded in  $\text{CD}_2\text{Cl}_2$ .

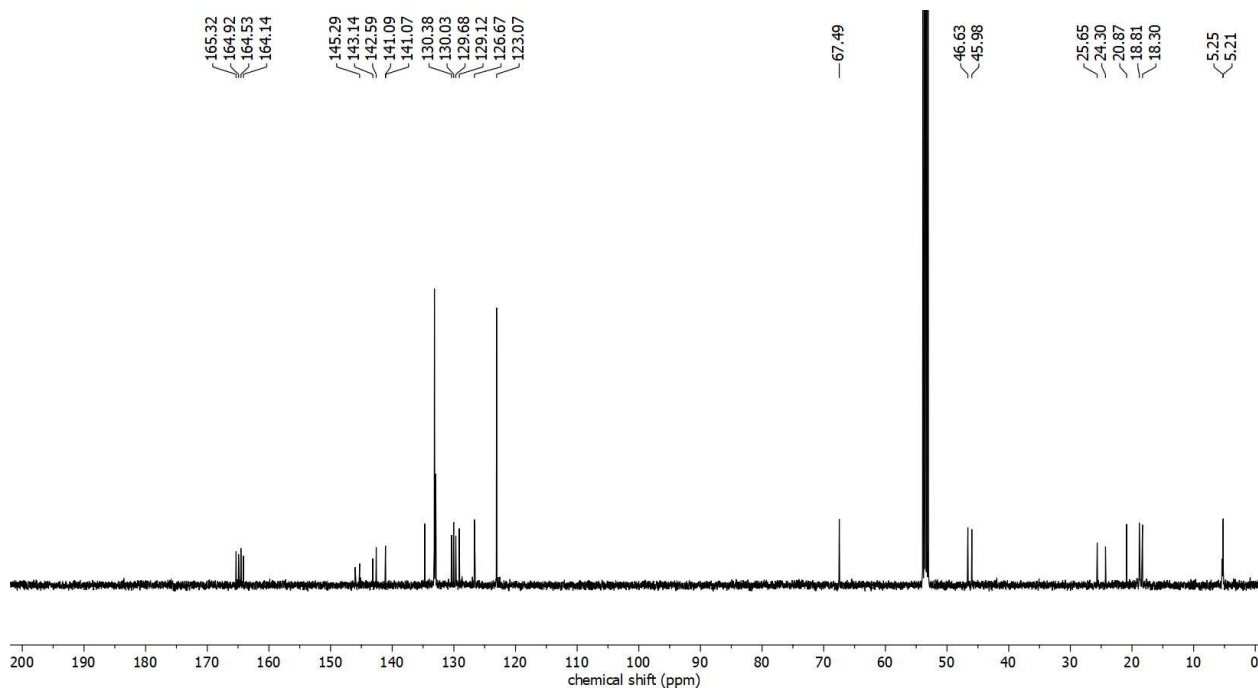

Figure S6:  $^{13}\text{C}\{^1\text{H}\}$  NMR spectrum of **2A** recorded in  $\text{CD}_2\text{Cl}_2$ .



### Synthesis and characterization of 3A:

**1A** (0.100 g, 0.243 mmol) and AgOTf (0.063 g, 0.243 mmol) were loaded into a Schlenk flask. Dichloromethane (5 mL) was condensed on to the mixture at -78 °C. The reaction mixture was allowed to attain room temperature and stirred for 5 h. Thereafter, filtration of the reaction mixture gave a colorless solution. The solution was concentrated to 1 mL, layered with *n*-pentane and stored at -30 °C to receive colorless crystals of **3A**.

Yield: 0.092 g, 72%

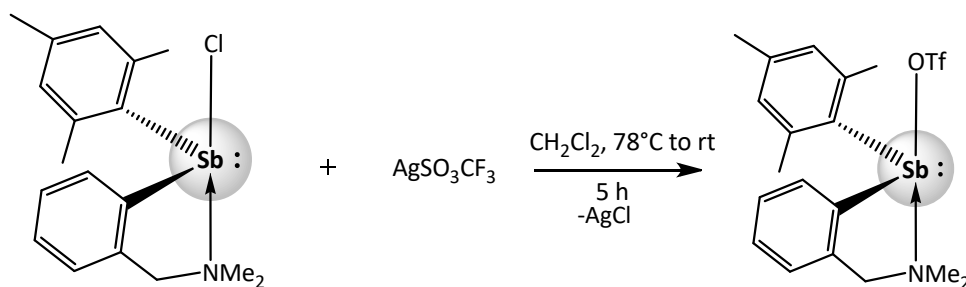

**Scheme S3**

Elemental analysis for C<sub>19</sub>H<sub>23</sub>NO<sub>3</sub>SF<sub>3</sub>Sb: C, 43.53; H, 4.42; N, 2.67. Found: C, 43.47; H, 4.38; N, 2.59

<sup>1</sup>H NMR(CD<sub>2</sub>Cl<sub>2</sub>, 500 MHz): δ 1.83 (s, br, 3H, *o*-CH<sub>3</sub>), 2.26 (s, 3H, *p*-CH<sub>3</sub>), 2.38 (s, 3H, NMe<sub>2</sub>), 2.62 (s, 3H, NMe<sub>2</sub>), 2.82 (3H, s, br, *o*-CH<sub>3</sub>), AB spin system with A at 3.74, 3.77 (d, 1H, CH<sub>2</sub>, <sup>3</sup>J<sub>HH</sub> = 14.3 Hz) and B at 3.94, 3.97 (d, 1H, CH<sub>2</sub>, <sup>3</sup>J<sub>HH</sub> = 14.3 Hz), 6.86, 6.98 (d, br, 2H, *m*-H (C<sub>6</sub>H<sub>11</sub>), <sup>3</sup>J<sub>HH</sub> = 63.5 Hz), 7.32 (d, 1H, *o*-C<sub>6</sub>H<sub>4</sub>, <sup>3</sup>J<sub>HH</sub> = 7.1 Hz), 7.46(dt, 2H, C<sub>6</sub>H<sub>4</sub>, <sup>3</sup>J<sub>HH</sub> = 7.4 Hz), 8.18 (d, 1H, *m*-C<sub>6</sub>H<sub>4</sub>, <sup>3</sup>J<sub>HH</sub> = 7.3 Hz)

<sup>13</sup>C{<sup>1</sup>H} NMR (CD<sub>2</sub>Cl<sub>2</sub>, 125 MHz): δ 20.8 (*p*-CH<sub>3</sub>), 24.2 (*o*-CH<sub>3</sub>), 47.2 (NMe<sub>2</sub>), 68.4 (CH<sub>2</sub>NMe<sub>2</sub>), 126.1 (c, C<sub>6</sub>H<sub>4</sub>), 129.3 (d, C<sub>6</sub>H<sub>4</sub>), 129.8 (*m*-CH, C<sub>9</sub>H<sub>11</sub>), 129.3 (e, C<sub>6</sub>H<sub>4</sub>), 136.1 (g, C<sub>9</sub>H<sub>11</sub>), 139.2 (i, C<sub>9</sub>H<sub>11</sub>), 140.8 (b, C<sub>6</sub>H<sub>4</sub>), 142.6 (f, C<sub>6</sub>H<sub>4</sub>), 146.9 (a, C<sub>6</sub>H<sub>4</sub>, h, C<sub>6</sub>H<sub>11</sub>)

<sup>19</sup>F NMR (CD<sub>2</sub>Cl<sub>2</sub>, 471 MHz): δ -78.6 (s, OSO<sub>2</sub>CF<sub>3</sub>)

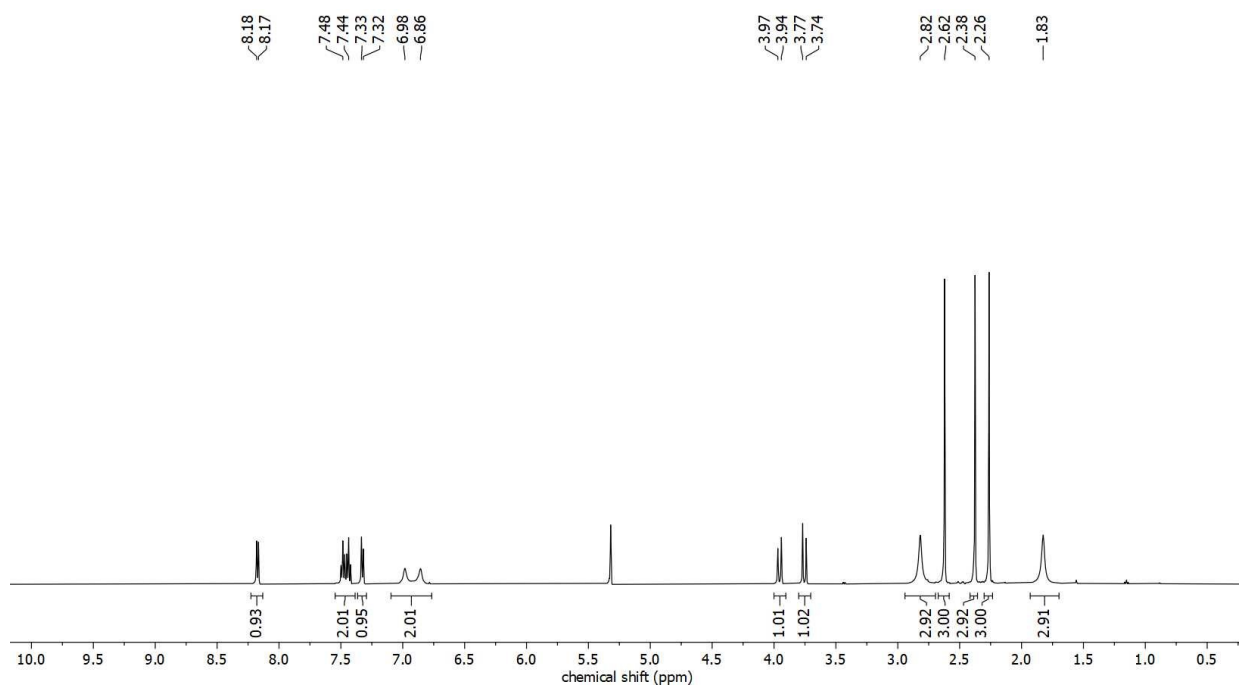

Figure S7:  $^1\text{H}$  NMR spectrum of **3A** recorded in  $\text{CD}_2\text{Cl}_2$ .

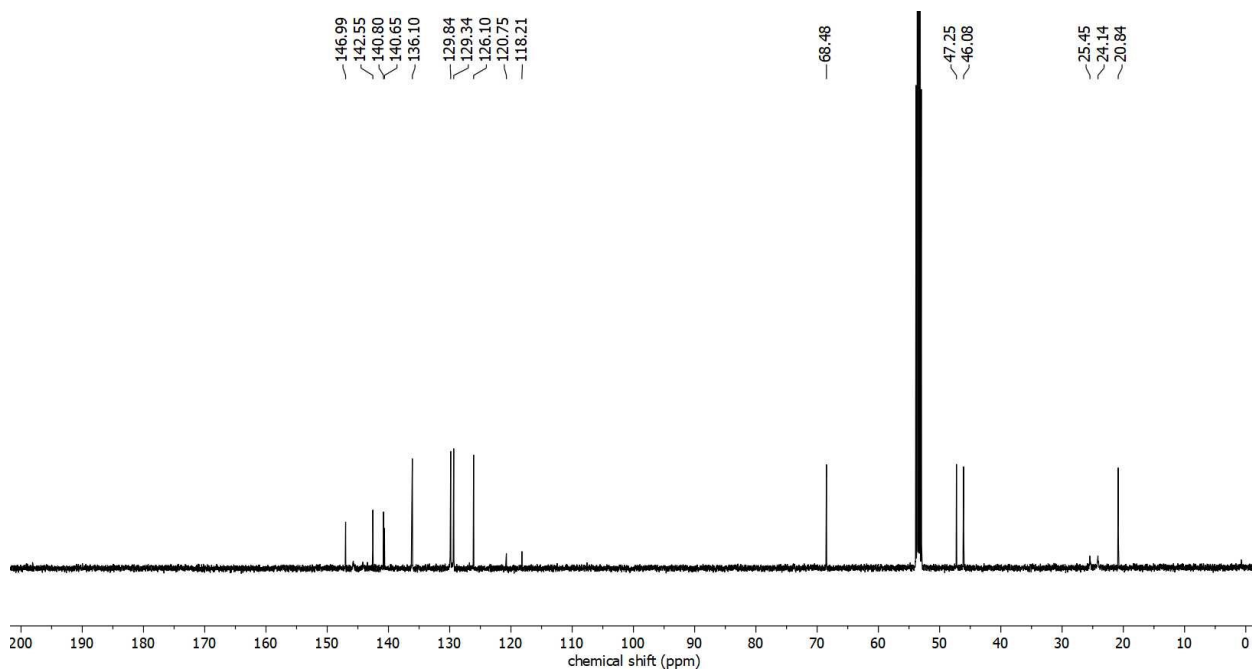

Figure S8:  $^{13}\text{C}\{^1\text{H}\}$  NMR spectrum of **3A** recorded in  $\text{CD}_2\text{Cl}_2$ .

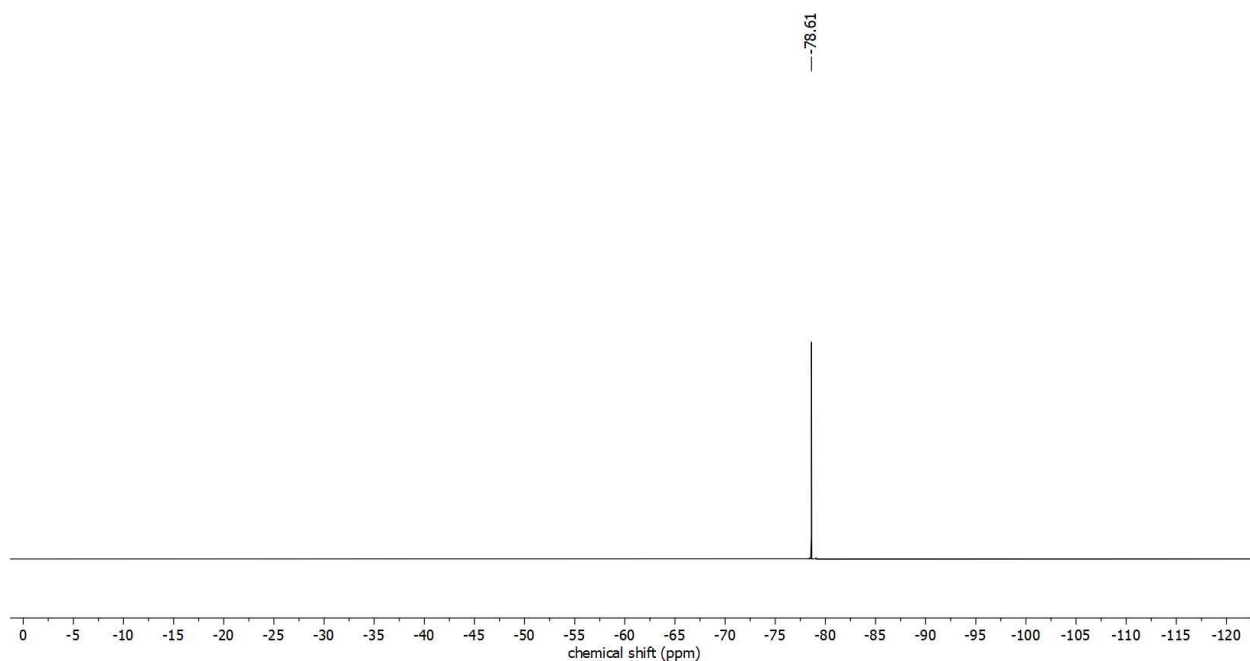

**Figure S9:**  $^{19}\text{F}$  NMR spectrum of **3A** recorded in  $\text{CD}_2\text{Cl}_2$ .

#### Synthesis and characterization of **4A**:

**1A** (0.1 g, 0.243 mmol),  $\text{Ph}_2\text{CO}$  (0.044 g, 0.085 mmol) and  $[\text{Ag}(\text{CH}_2\text{Cl}_2)_2][\text{Al}(\text{OC}(\text{CF}_3)_3)_4]$  (0.303 g, 0.243 mmol) were loaded into a vial in glovebox. Dichloromethane (5 mL) was added on to the mixture at room temperature. The reaction mixture was stirred for 3 h. Thereafter, filtration of the reaction mixture resulted in a pale-yellow solution. The solution was concentrated to 1.5 mL, layered with *n*-pentane and stored at  $-30\text{ }^\circ\text{C}$  to obtain yellow crystals of **4A** after four days.

Yield: 0.196 g, 47%

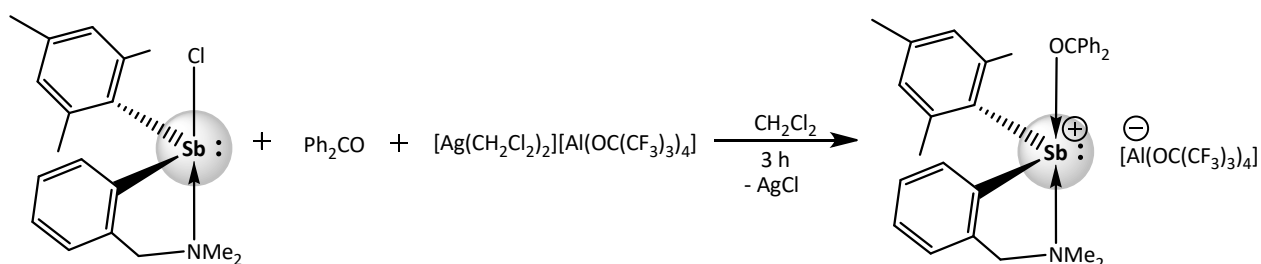

**Scheme S4**

Elemental analysis for  $\text{C}_{47}\text{H}_{33}\text{NO}_5\text{F}_{36}\text{AlSb}$ : C, 37.03; H, 2.18; N, 0.92. Found: C, 37.13; H, 2.13; N, 0.90

$^1\text{H}$  NMR ( $\text{CD}_2\text{Cl}_2$ , 500 MHz):  $\delta$  2.17 (s, br, 6H, *o*- $\text{CH}_3$ ), 2.25 (s, 3H, *p*- $\text{CH}_3$ ), 2.60 (s, 3H,  $\text{NMe}_2$ ), 2.85 (s, 3H,  $\text{NMe}_2$ ), AB spin system with A at 4.03, 4.06 (d, 1H,  $\text{CH}_2$ ,  $^3J_{\text{HH}} = 14.3$  Hz) and B at 4.22, 4.25 (d, 1H,  $\text{CH}_2$ ,  $^3J_{\text{HH}} = 14.3$  Hz), 6.91 (s, br, 2H, *m*-H ( $\text{C}_6\text{H}_{11}$ )), 7.52 (t, 4H, *m*-CH,  $\text{Ph}_2\text{CO}$ ,

$^3J_{\text{HH}} = 7.6 \text{ Hz}$ , 7.60 (t, 1H, *p*-CH, Ph<sub>2</sub>CO, 1H, t, C<sub>6</sub>H<sub>4</sub>,  $^3J_{\text{HH}} = 3.4 \text{ Hz}$ ), 7.66 (d, 1H, *o*-CH, Ph<sub>2</sub>CO,  $^3J_{\text{HH}} = 8.9 \text{ Hz}$ ), 7.71 (t, 2H, C<sub>6</sub>H<sub>4</sub>,  $^3J_{\text{HH}} = 7.7 \text{ Hz}$ ), 8.21 (d, 1H, C<sub>6</sub>H<sub>4</sub>)

$^{13}\text{C}\{^1\text{H}\}$  NMR (CD<sub>2</sub>Cl<sub>2</sub>, 125 MHz):  $\delta$  20.9 (*p*-CH<sub>3</sub>), 24.9 (*o*-CH<sub>3</sub>), 47.2, 48.7 (NMe<sub>2</sub>), 70.7 (CH<sub>2</sub>NMe<sub>2</sub>), 120.1, 122.5 (Al(OC(CF<sub>3</sub>)<sub>3</sub>)<sub>4</sub>,  $J_{\text{CF}} = 292.8 \text{ Hz}$ ), 126.2 (c, C<sub>6</sub>H<sub>4</sub>), 127.0 (d, C<sub>6</sub>H<sub>4</sub>), 128.7 (*m*-CH, C<sub>9</sub>H<sub>11</sub>), 130.6 (e, C<sub>6</sub>H<sub>4</sub>), 136.5 (g, C<sub>9</sub>H<sub>11</sub>), 139.2 (i, C<sub>6</sub>H<sub>11</sub>), 142.9 (b, C<sub>6</sub>H<sub>4</sub>), 143.0 (f,), 145.2 (h, C<sub>9</sub>H<sub>11</sub>), 146.7 (a, C<sub>6</sub>H<sub>4</sub>), 202.7 (Ph<sub>2</sub>CO)

$^{19}\text{F}$  NMR (CD<sub>2</sub>Cl<sub>2</sub>, 471 MHz):  $\delta$  -75.7 (s, Al(OC(CF<sub>3</sub>)<sub>3</sub>)<sub>4</sub>)

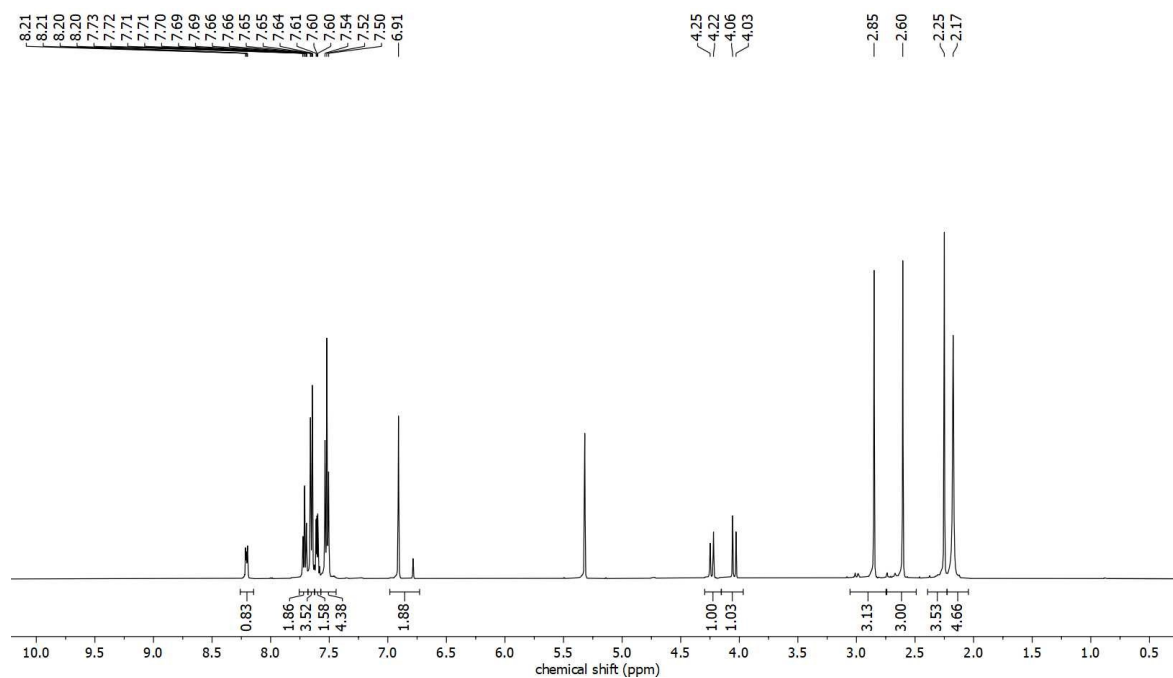

Figure S10:  $^1\text{H}$  NMR spectrum of **4A** recorded in CD<sub>2</sub>Cl<sub>2</sub>.

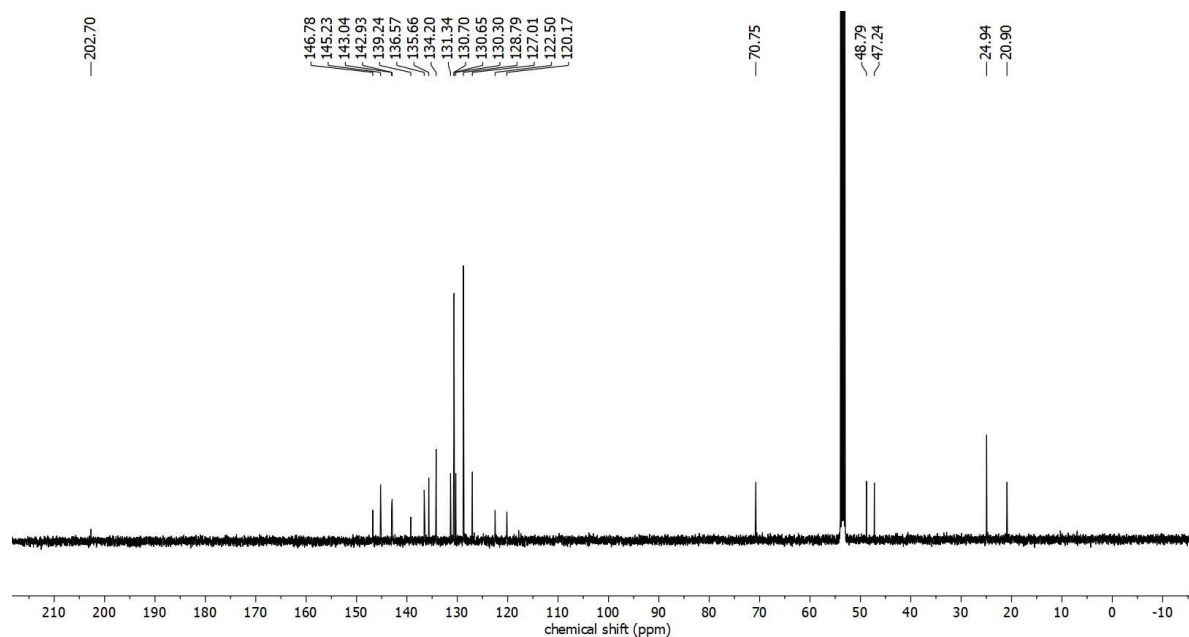

Figure S11:  $^{13}\text{C}\{^1\text{H}\}$  NMR spectrum of **4A** recorded in CD<sub>2</sub>Cl<sub>2</sub>.

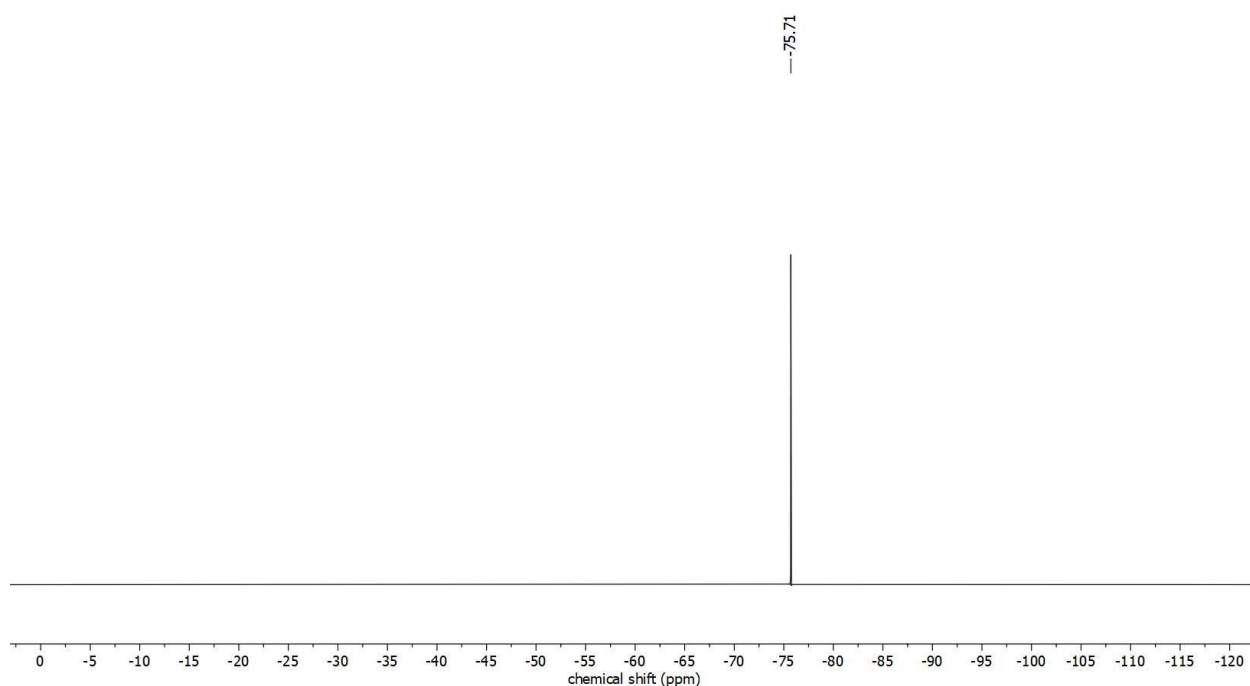

**Figure S12:**  $^{19}\text{F}$  NMR spectrum of **4A** recorded in  $\text{CD}_2\text{Cl}_2$ .

### Synthesis and characterization of **1B**:

A 30 mL toluene solution of (mesityl)Li (0.323 g, 2.56 mmol) was added dropwise to a 20 mL toluene solution of  $(\text{NMe}_2)\text{C}_6\text{H}_4\text{SbCl}_2$  (0.800 g, 2.56 mmol) at  $-78^\circ\text{C}$ . The reaction was allowed to attain ambient temperature and stirred for 24 h. The reaction mixture was filtered and toluene was distilled off. The white powder was dissolved in 2 mL dichloromethane layered with *n*-pentane. Colorless crystals of **1B** were obtained after 1 day at  $-30^\circ\text{C}$ .

Yield: 0.70 g, 69 %

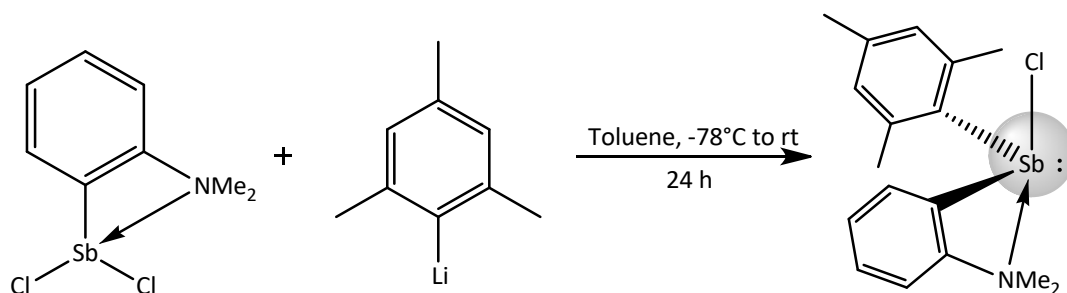

**Scheme S5**

Elemental analysis for  $\text{C}_{17}\text{H}_{21}\text{NSbCl}$ : C, 51.49; H, 5.34; N, 3.53. Found: C, 51.36; H, 5.38; N, 3.52.

$^1\text{H}$  NMR ( $\text{CD}_2\text{Cl}_2$ , 500 MHz):  $\delta$  2.22 (s, 3H, *p*- $\text{CH}_3$ ), 2.44 (s, br, 6H,  $\text{NMe}_2$ , 6H, *o*- $\text{CH}_3$ ), 6.84 (s, br, 2H, *m*-H), 7.21 (d, 1H, *o*- $\text{C}_6\text{H}_4$ ,  $^3J_{\text{HH}} = 7.5$  Hz), 7.45 (t, 2H, *m*- $\text{C}_6\text{H}_4$ ,  $^3J_{\text{HH}} = 3.5$  Hz), 8.01 (d, 1H, *m*- $\text{C}_6\text{H}_4$ ,  $^3J_{\text{HH}} = 5.6$  Hz)

$^{13}\text{C}\{^1\text{H}\}$  NMR ( $\text{CD}_2\text{Cl}_2$ , 125 MHz):  $\delta$  20.8 (*p*- $\text{CH}_3$ ), 24.1 (*o*- $\text{CH}_3$ ), 46.4 ( $\text{NMe}_2$ ), 120.9 (c,  $\text{C}_6\text{H}_4$ ), 129.0 (i,  $\text{C}_9\text{H}_{11}$ ), 129.1 (d,  $\text{C}_6\text{H}_4$ ), 130.5 (e,  $\text{C}_6\text{H}_4$ ), 134.7 ( $\text{C}_9\text{H}_{11}$ , *m*-CH), 139.6 (f,  $\text{C}_6\text{H}_4$ ), 142.1 (h,  $\text{C}_9\text{H}_{11}$ ), 142.4 (b,  $\text{C}_6\text{H}_4$ ), 144.47 (g,  $\text{C}_9\text{H}_{11}$ ), 156.1 (a,  $\text{C}_6\text{H}_4$ )

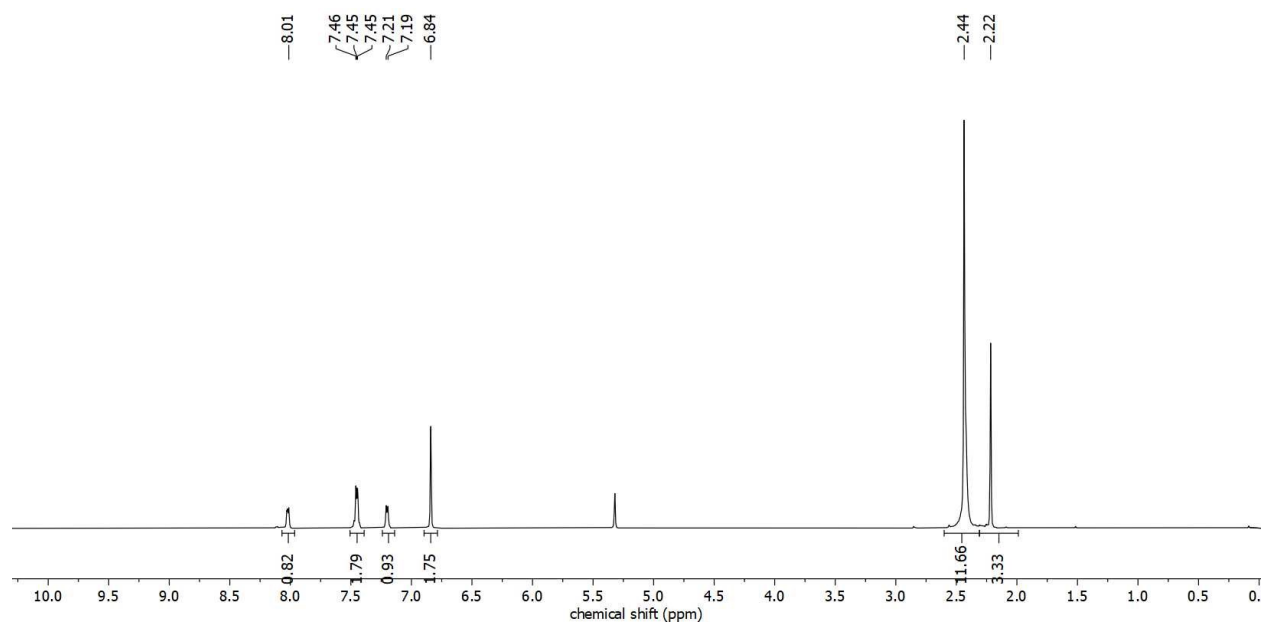

**Figure S13:**  $^1\text{H}$  NMR spectrum of **1B** recorded in  $\text{CD}_2\text{Cl}_2$ .

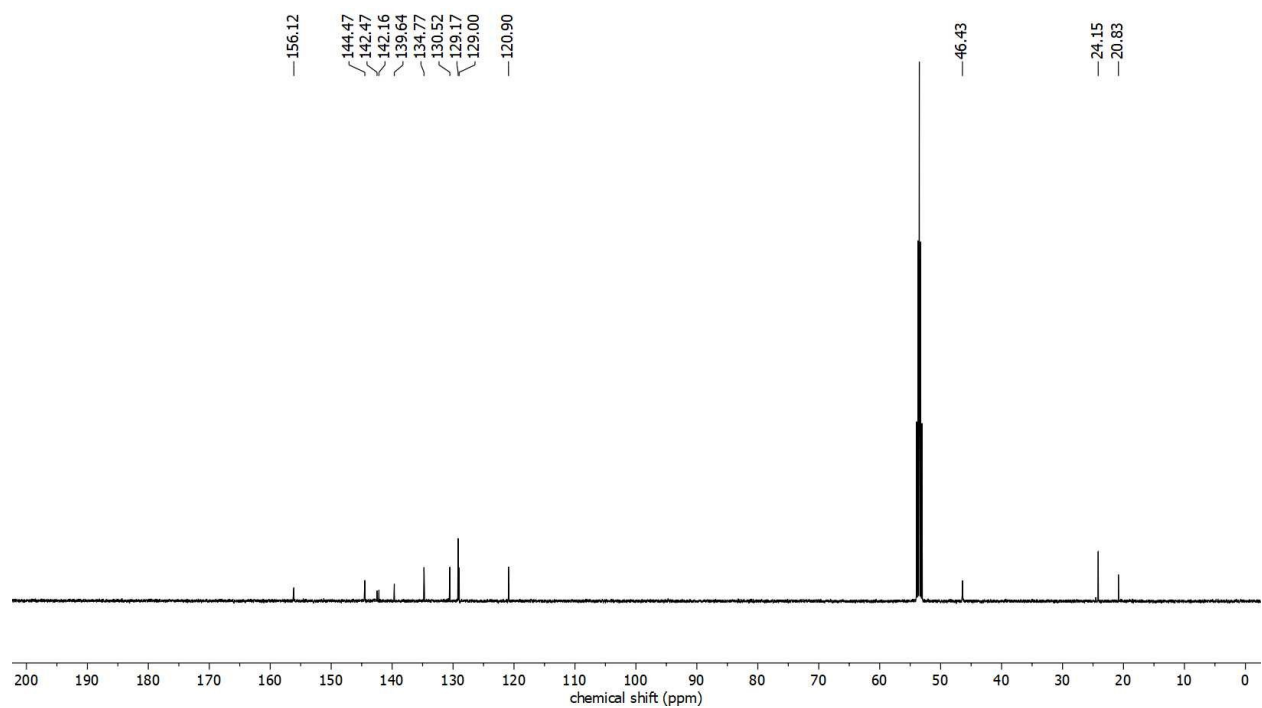

**Figure S14:**  $^{13}\text{C}\{^1\text{H}\}$  NMR spectrum of **1B** recorded in  $\text{CD}_2\text{Cl}_2$ .

## Synthesis and characterization of **2B**:

**1B** (0.050 g, 0.126 mmol), O=P<sub>Et</sub><sub>3</sub> (0.017 g, 0.126 mmol) and [Ag(CH<sub>3</sub>CN)<sub>2</sub>][B(C<sub>6</sub>H<sub>3</sub>Cl<sub>2</sub>)<sub>4</sub>] (0.104 g, 0.126 mmol) were loaded into a Schlenk flask. Dichloromethane (5 mL) was condensed on to the mixture at -78 °C. The reaction mixture was allowed to attain room temperature and stirred overnight. Thereafter, filtration of reaction mixture gave a colorless solution. The solution was concentrated to 1.5 mL, layered with *n*-pentane and stored at -30 °C to obtain colorless crystals of **2B**.

Yield: 0.102 g, 66%

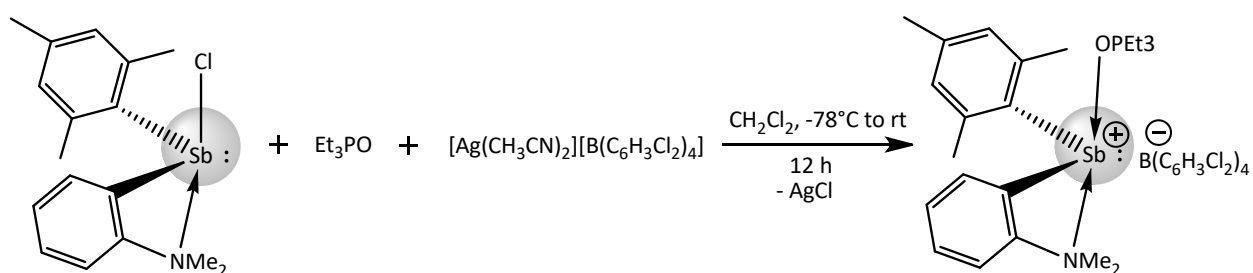

**Scheme S6**

Elemental analysis for C<sub>47</sub>H<sub>48</sub>BNOPCl<sub>8</sub>Sb: C, 51.79; H, 4.44; N, 1.28. Found: C, 51.82; H, 4.38; N, 1.29.

<sup>1</sup>H NMR (CD<sub>2</sub>Cl<sub>2</sub>, 500 MHz): δ 1.12 (m, 9H, Et<sub>3</sub>PO, CH<sub>3</sub>), 1.92 (m, 6H, Et<sub>3</sub>PO, CH<sub>2</sub>), 2.11 (s, br, 3H, *o*-CH<sub>3</sub>), 2.18 (s, 3H, *p*-CH<sub>3</sub>), 2.21 (s, br, 3H, *o*-CH<sub>3</sub>), 2.60 (s, 3H, NMe<sub>2</sub>), 2.87 (s, 3H, NMe<sub>2</sub>), 6.84, 6.91 (d, 2H, *m*-H, <sup>3</sup>J<sub>HH</sub> = 34 Hz), 7.24 (d, 1H, *m*-C<sub>6</sub>H<sub>4</sub>, <sup>3</sup>J<sub>HH</sub> = 7.7 Hz), 7.52 (m, 2H, *o*-C<sub>6</sub>H<sub>4</sub>, <sup>3</sup>J<sub>HH</sub> = 7.5 Hz), 7.70 (d, 1H, *m*-C<sub>6</sub>H<sub>4</sub>, <sup>3</sup>J<sub>HH</sub> = 7.5 Hz)

<sup>13</sup>C{<sup>1</sup>H} NMR (CD<sub>2</sub>Cl<sub>2</sub>, 125 MHz): δ 5.2 (OPET<sub>3</sub>, CH<sub>3</sub>), 18.1 (OPET<sub>3</sub>, CH<sub>2</sub>), 18.6 (*o*-CH<sub>3</sub>), 20.9 (*p*-CH<sub>3</sub>), 46.8 (3H, NMe<sub>2</sub>), 121.0 (c, C<sub>6</sub>H<sub>4</sub>), 123.0 (i, C<sub>6</sub>H<sub>4</sub>), 129.9 (C<sub>9</sub>H<sub>11</sub>, *m*-CH), 132.9 (d, C<sub>6</sub>H<sub>4</sub>), 133.1 (e, C<sub>6</sub>H<sub>4</sub>), 134.0 (f, C<sub>9</sub>H<sub>11</sub>), 140.7 (h, C<sub>9</sub>H<sub>11</sub>), 141.3 (b, C<sub>6</sub>H<sub>4</sub>), 143.5 (g, C<sub>9</sub>H<sub>11</sub>), 155.4 (a, C<sub>6</sub>H<sub>4</sub>), 164.7 (q, <sup>1</sup>J<sub>BC</sub> = 49.2 Hz, BAr<sup>Cl</sup><sub>2</sub>)

<sup>11</sup>B NMR (CD<sub>2</sub>Cl<sub>2</sub>, 160 MHz): δ -6.9 (s, B(C<sub>6</sub>H<sub>3</sub>Cl<sub>2</sub>)<sub>4</sub>)

<sup>31</sup>P{<sup>1</sup>H} NMR (CD<sub>2</sub>Cl<sub>2</sub>, 202 MHz): δ 77.8 (s, OPET<sub>3</sub>)

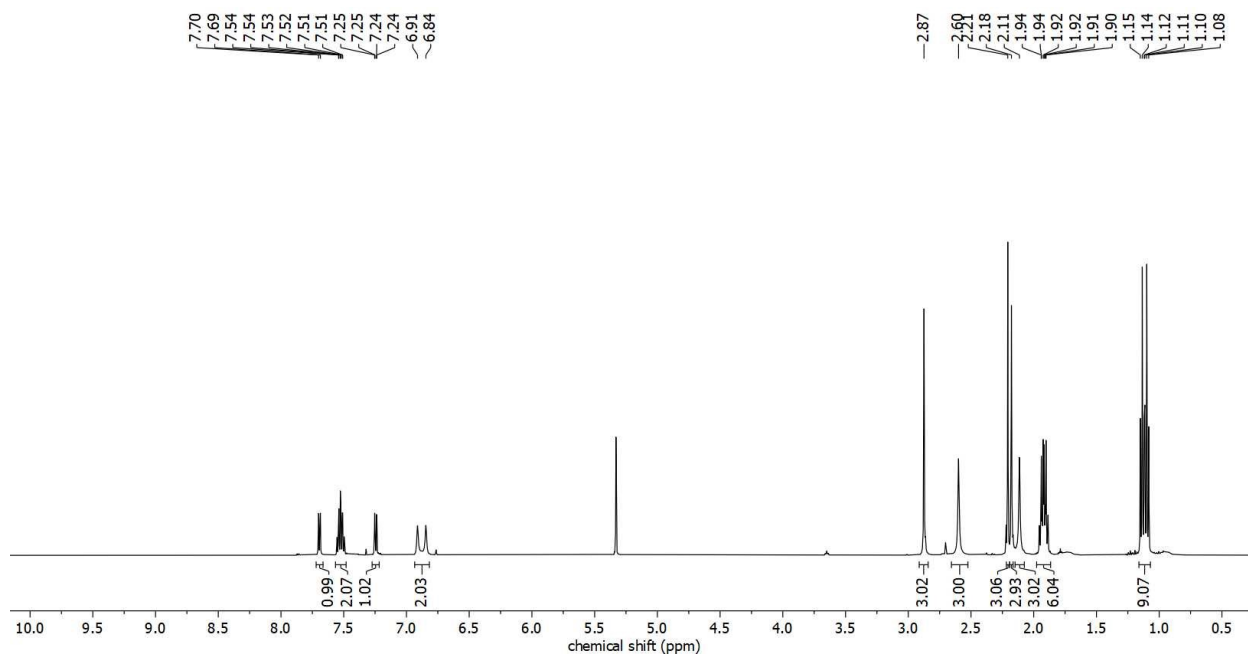

Figure S15:  $^1\text{H}$  NMR spectrum of **2B** recorded in  $\text{CD}_2\text{Cl}_2$ .

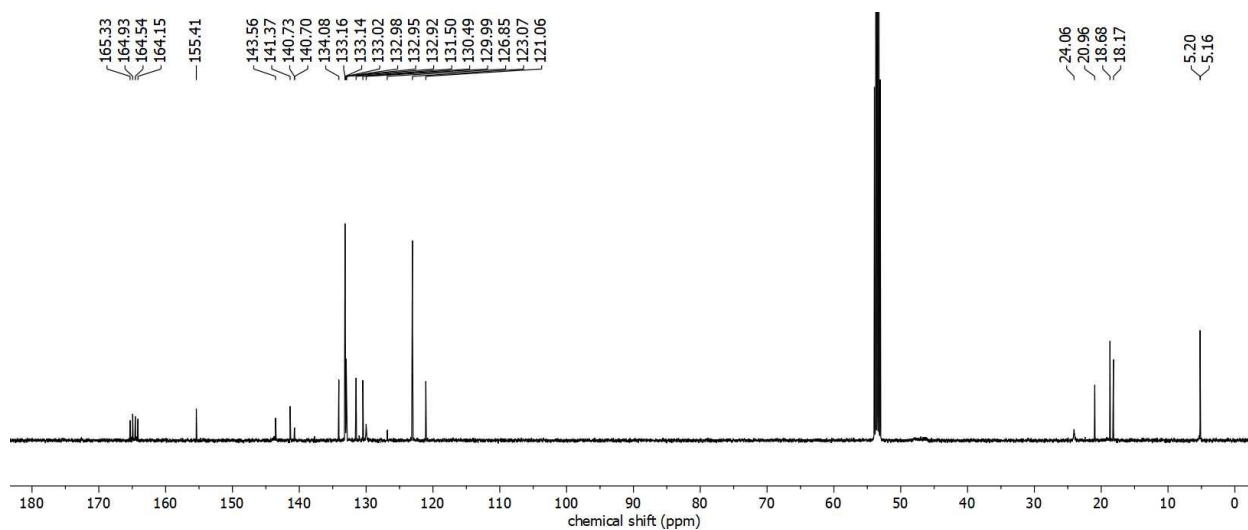

Figure S16:  $^{13}\text{C}\{^1\text{H}\}$  NMR spectrum of **2B** recorded in  $\text{CD}_2\text{Cl}_2$ .



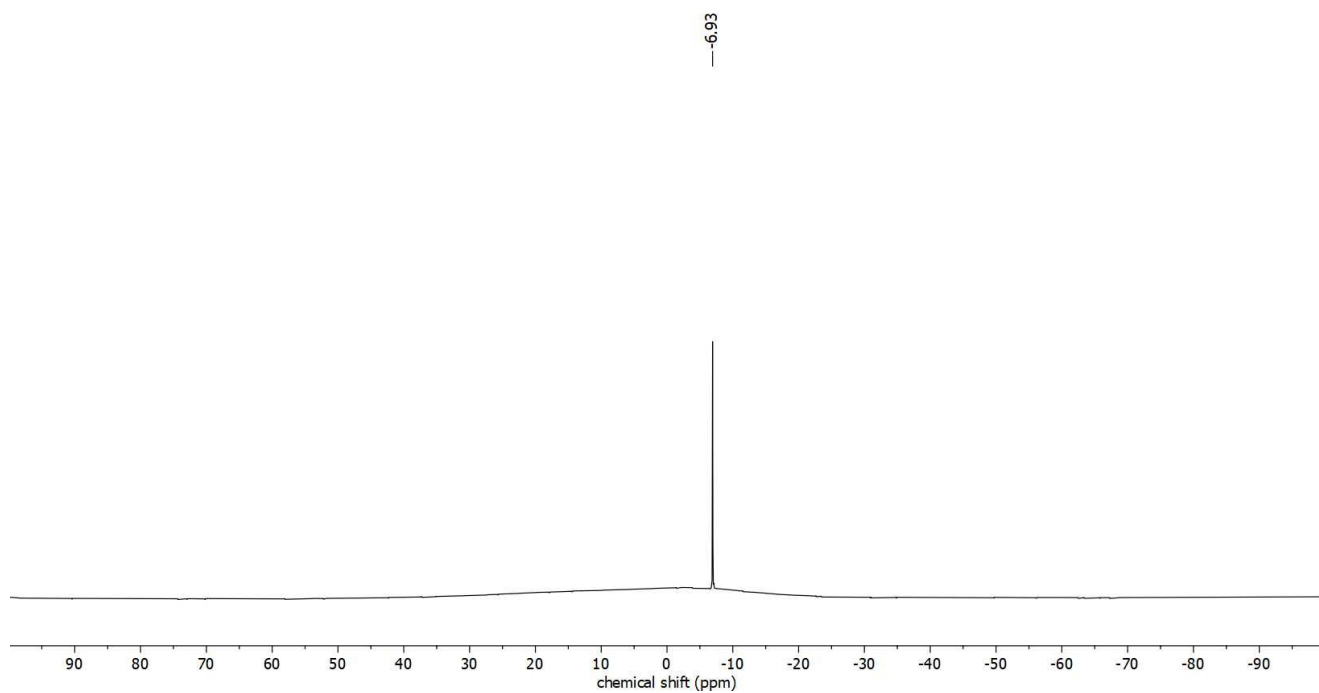

**Figure S17:**  $^{11}\text{B}$  NMR spectrum of **2B** recorded in  $\text{CD}_2\text{Cl}_2$ .

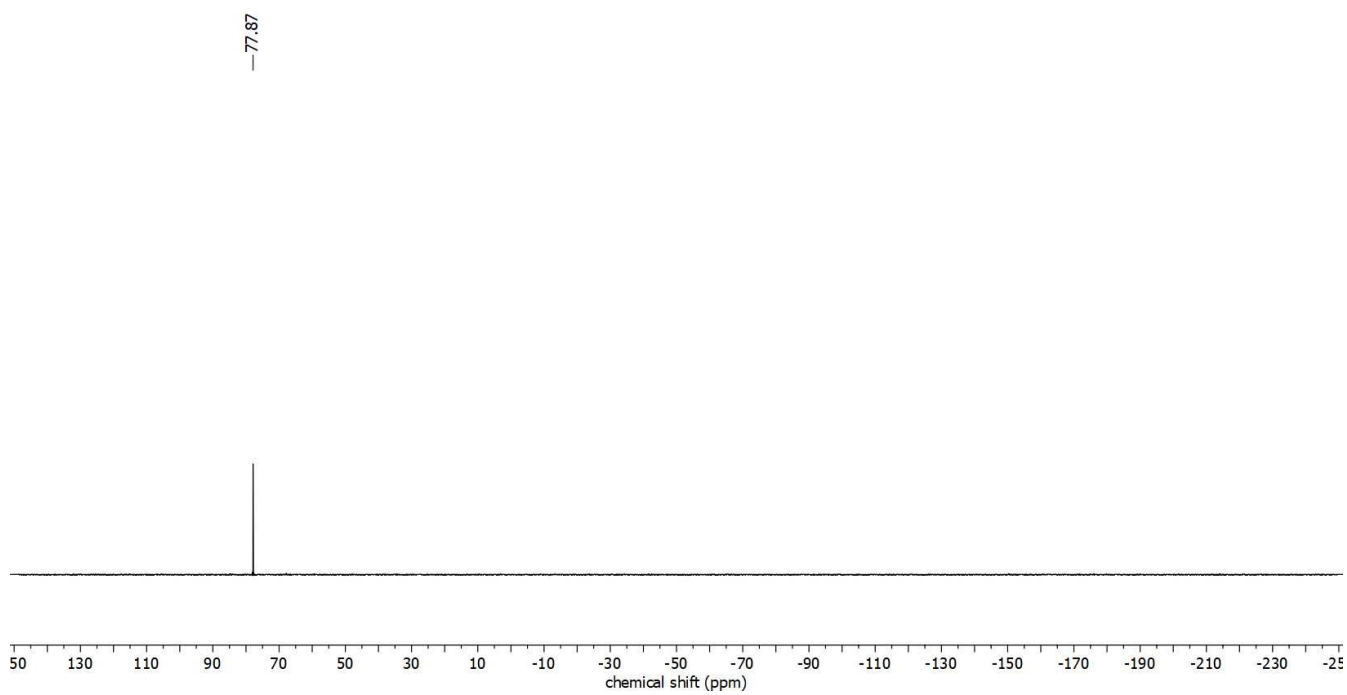

**Figure S18:**  $^{31}\text{P}\{^1\text{H}\}$  NMR spectrum of **2B** recorded in  $\text{CD}_2\text{Cl}_2$ .

### Synthesis and characterization of **3B**:

**1B** (0.100 g, 0.252 mmol), and AgOTf (0.065 g, 0.252 mmol) were loaded into a Schlenk flask. Dichloromethane (5 mL) was condensed on to the mixture at -78 °C. The reaction mixture was allowed to attain room temperature and stirred for 5.5 h. Thereafter, filtration of the reaction mixture gave a colorless solution. The solution was concentrated to 1 mL, layered with *n*-pentane and stored at -30 °C to receive colorless crystals of **3B**.

Yield: 0.1 g, 78%

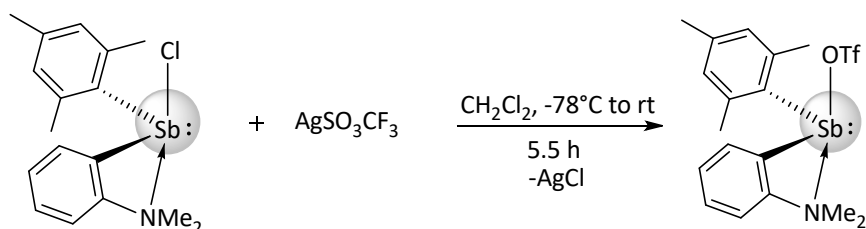

**Scheme S7**

Elemental analysis for C<sub>18</sub>H<sub>21</sub>NO<sub>3</sub>SF<sub>3</sub>Sb: C, 42.38; H, 4.15; N, 2.75. Found: C, 42.41; H, 4.17; N, 2.78

<sup>1</sup>H NMR (CD<sub>2</sub>Cl<sub>2</sub>, 500 MHz): δ 2.12 (s, 3H, *p*-CH<sub>3</sub>), 2.20 (s, 3H, *o*-CH<sub>3</sub>), 2.27 (s, 3H, *o*-CH<sub>3</sub>), 2.61 (s, 3H, NMe<sub>2</sub>), 2.95 (s, 3H, NMe<sub>2</sub>), 6.87 (d, 2H, *m*-H, <sup>3</sup>J<sub>HH</sub> = 22.4 Hz), 7.19 (d, 1H, *m*-C<sub>6</sub>H<sub>4</sub>, <sup>3</sup>J<sub>HH</sub> = 8.4 Hz), 7.52 (m, 2H, *p*-C<sub>6</sub>H<sub>4</sub>, <sup>3</sup>J<sub>HH</sub> = 8 Hz), 7.93 (d, 2H, *m*-C<sub>6</sub>H<sub>4</sub>, <sup>3</sup>J<sub>HH</sub> = 8.3 Hz)

<sup>13</sup>C{<sup>1</sup>H} NMR (CD<sub>2</sub>Cl<sub>2</sub>, 125 MHz): δ 20.8 (*p*-CH<sub>3</sub>), 23.9 (*o*-CH<sub>3</sub>), 47.1 (NMe<sub>2</sub>), 120.3 (c, C<sub>6</sub>H<sub>4</sub>), 129.7 (i, C<sub>6</sub>H<sub>4</sub>), 130.6 (C<sub>9</sub>H<sub>11</sub>, *m*-CH), 131.1 (d, C<sub>6</sub>H<sub>4</sub>), 131.5 (e, C<sub>6</sub>H<sub>4</sub>), 135.3 (f, C<sub>6</sub>H<sub>4</sub>), 140.5 (h, C<sub>9</sub>H<sub>11</sub>), 141.0 (b, C<sub>9</sub>H<sub>11</sub>), 144.3 (g, C<sub>9</sub>H<sub>11</sub>), 155.2 (a, C<sub>6</sub>H<sub>4</sub>)

<sup>19</sup>F NMR (CD<sub>2</sub>Cl<sub>2</sub>, 471 MHz): δ -78.1 (s, OSO<sub>2</sub>CF<sub>3</sub>)

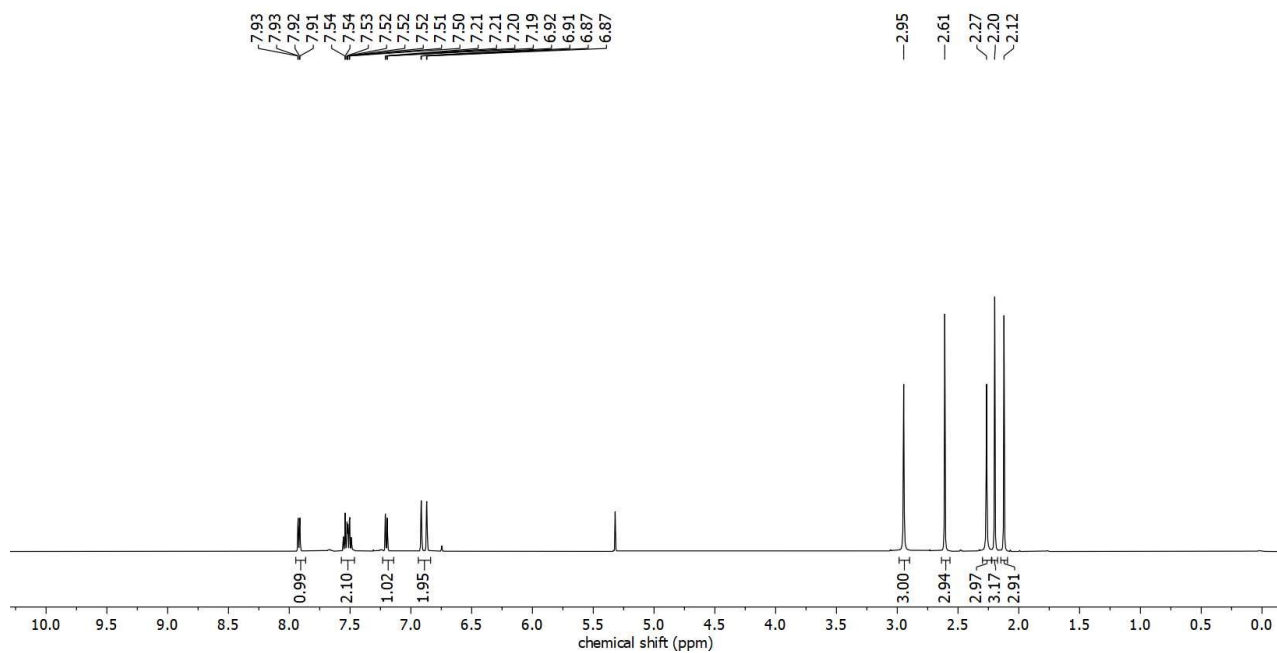

Figure S19:  $^1\text{H}$  NMR spectrum of **3B** recorded in  $\text{CD}_2\text{Cl}_2$ .

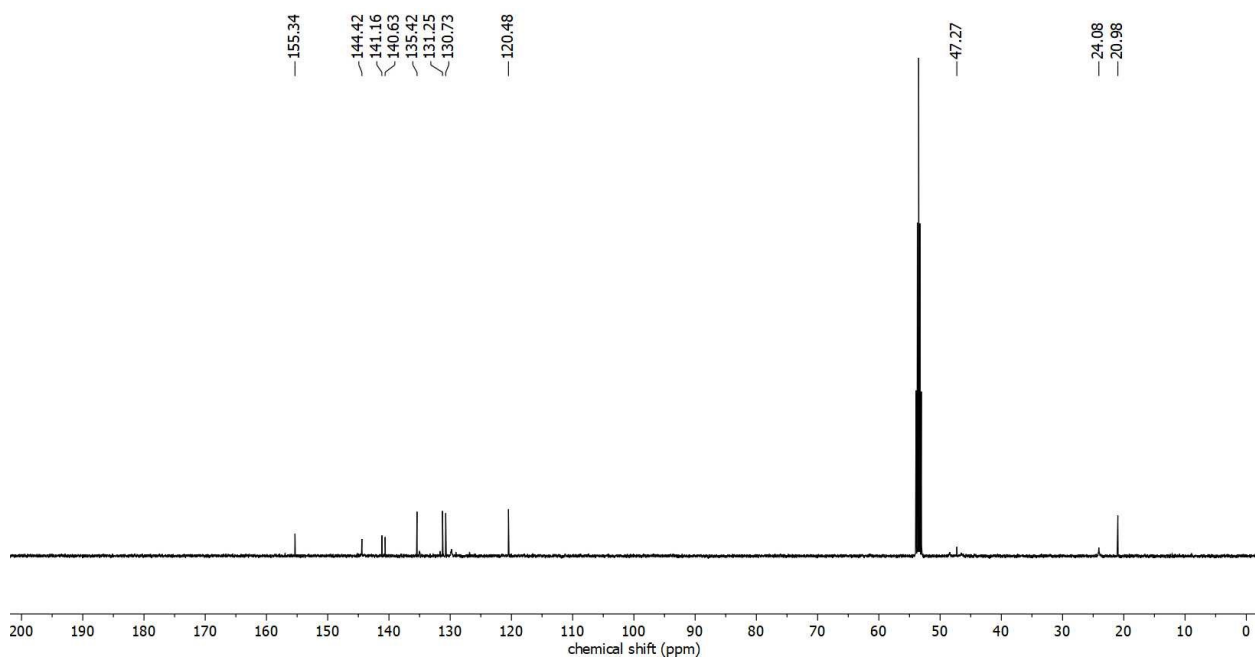

Figure S20:  $^{13}\text{C}\{^1\text{H}\}$  NMR spectrum of **3B** recorded in  $\text{CD}_2\text{Cl}_2$ .

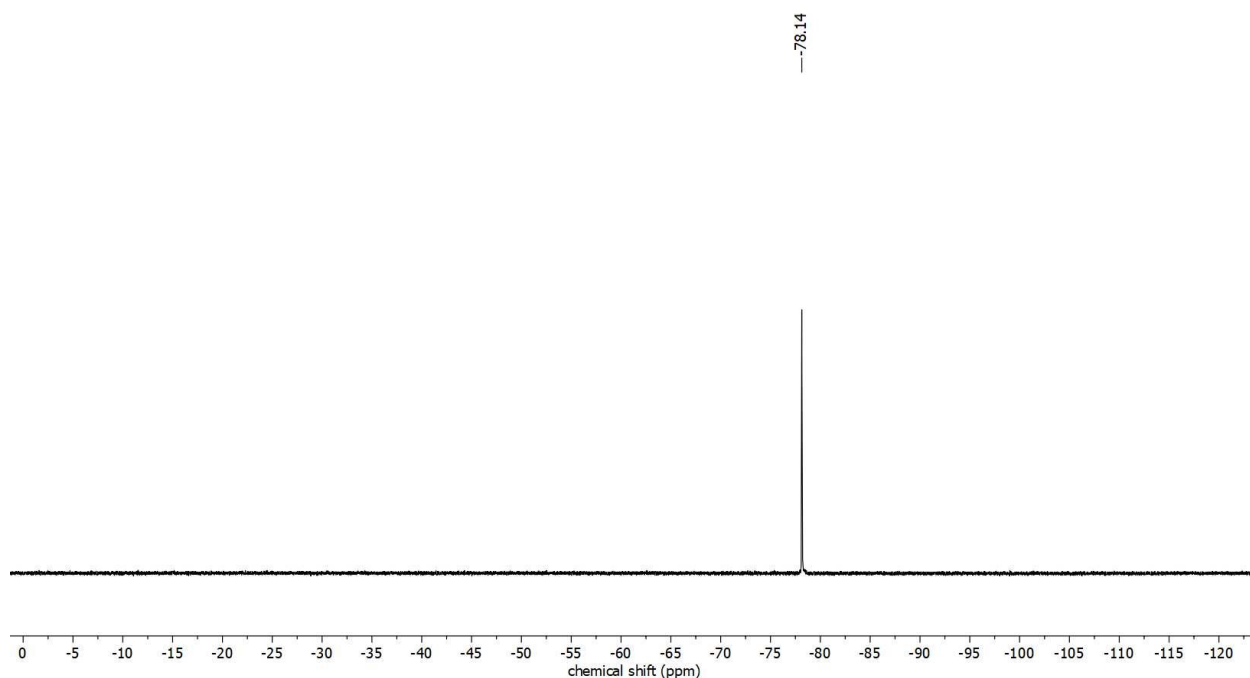

**Figure S21:**  $^{19}\text{F}$  NMR spectrum of **3B** recorded in  $\text{CD}_2\text{Cl}_2$ .

### Synthesis and characterization of **4B**:

**1B** (0.040 g, 0.1 mmol), benzophenone (0.018 g, 0.1 mmol) and  $[\text{Ag}(\text{CH}_2\text{Cl}_2)_2][\text{Al}(\text{OC}(\text{CF}_3)_3)_4]$  (0.126 g, 0.1 mmol) were loaded into a vial inside glovebox. Dichloromethane (3 mL) was added on to the mixture at room temperature. The reaction mixture was stirred for 3 h. Thereafter, filtration of the reaction mixture gave a yellow solution. The solution was concentrated to 1.5 mL, layered with *n*-pentane and stored at  $-30\text{ }^\circ\text{C}$  to obtain yellow crystals of **4B**.

Yield: 0.073 g, 43%

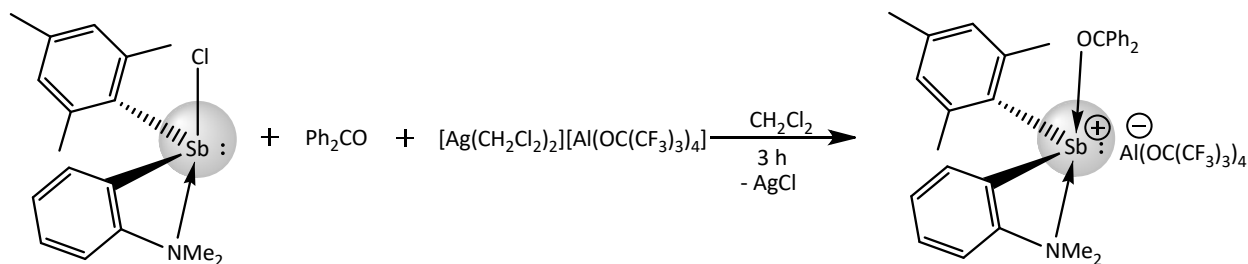

**Scheme S8**

Elemental analysis for  $\text{C}_{46}\text{H}_{31}\text{NO}_5\text{F}_{36}\text{AlSb}$ : C, 36.58; H, 2.07; N, 0.93. Found: C, 36.60; H, 2.12; N, 0.91

$^1\text{H}$  NMR ( $\text{CD}_2\text{Cl}_2$ , 500 MHz):  $\delta$  2.26 (s, 3H, *o*- $\text{CH}_3$ ), 2.32 (s, br, 3H, *p*- $\text{CH}_3$ , 3H, *o*- $\text{CH}_3$ ), 2.47 (s, 3H,  $\text{NMe}_2$ ), 3.04 (s, 3H,  $\text{NMe}_2$ ), 6.94 (s, br, 2H, *m*-H ( $\text{C}_6\text{H}_{11}$ )), 7.30 (d, 1H,  $\text{Ph}_2\text{CO}$ ,  $^3J_{\text{HH}} = 8.8$  Hz), 7.58 (t, 4H, *m*-CH,  $\text{Ph}_2\text{CO}$ ,  $^3J_{\text{HH}} = 7.8$  Hz), 7.68 (t, 4H, *p*-CH,  $\text{Ph}_2\text{CO}$ , 1H, t,  $\text{C}_6\text{H}_4$ ,  $^3J_{\text{HH}} = 7.6$  Hz), 7.74 (t,  $\text{C}_6\text{H}_4$ ,  $^3J_{\text{HH}} = 7.6$  Hz), 7.82 (t, 2H,  $\text{C}_6\text{H}_4$ ,  $^3J_{\text{HH}} = 7.3$  Hz), 8.22 (d, 1H,  $\text{C}_6\text{H}_4$ ,  $^3J_{\text{HH}} = 7.5$  Hz)

$^{13}\text{C}\{^1\text{H}\}$  NMR ( $\text{CD}_2\text{Cl}_2$ , 125 MHz):  $\delta$  20.9 (*p*- $\text{CH}_3$ ), 24.3 (*o*- $\text{CH}_3$ ), 47.4 ( $\text{NMe}_2$ ), 49.2 ( $\text{NMe}_2$ ), 120.9 ( $\text{Al}(\text{OC}(\text{CF}_3)_3)_4$ ,  $J_{\text{CF}} = 292.8$  Hz), 124.8 (c,  $\text{C}_6\text{H}_4$ ), 129.4 ( $\text{Ph}_2\text{CO}$ ), 126.8 (i,  $\text{C}_6\text{H}_4$ ), 130.4 ( $\text{C}_9\text{H}_{11}$ , *m*-CH), 131.4 ( $\text{Ph}_2\text{CO}$ ), 131.8 (d,  $\text{C}_9\text{H}_{11}$ ), 132.2 (e,  $\text{C}_6\text{H}_4$ ), 134.9 ( $\text{Ph}_2\text{CO}$ ), 137.7 (f,  $\text{C}_6\text{H}_4$ ), 138.4 (h,  $\text{C}_9\text{H}_{11}$ ), 142.6 (b,  $\text{C}_6\text{H}_4$ ), 144.3 (g,  $\text{C}_9\text{H}_{11}$ ), 155.6 (a,  $\text{C}_6\text{H}_4$ ), 208.6 ( $\text{Ph}_2\text{CO}$ )

$^{19}\text{F}$  NMR ( $\text{CD}_2\text{Cl}_2$ , 471 MHz):  $\delta$  -75.7 (s,  $\text{Al}(\text{OC}(\text{CF}_3)_3)_4$ )

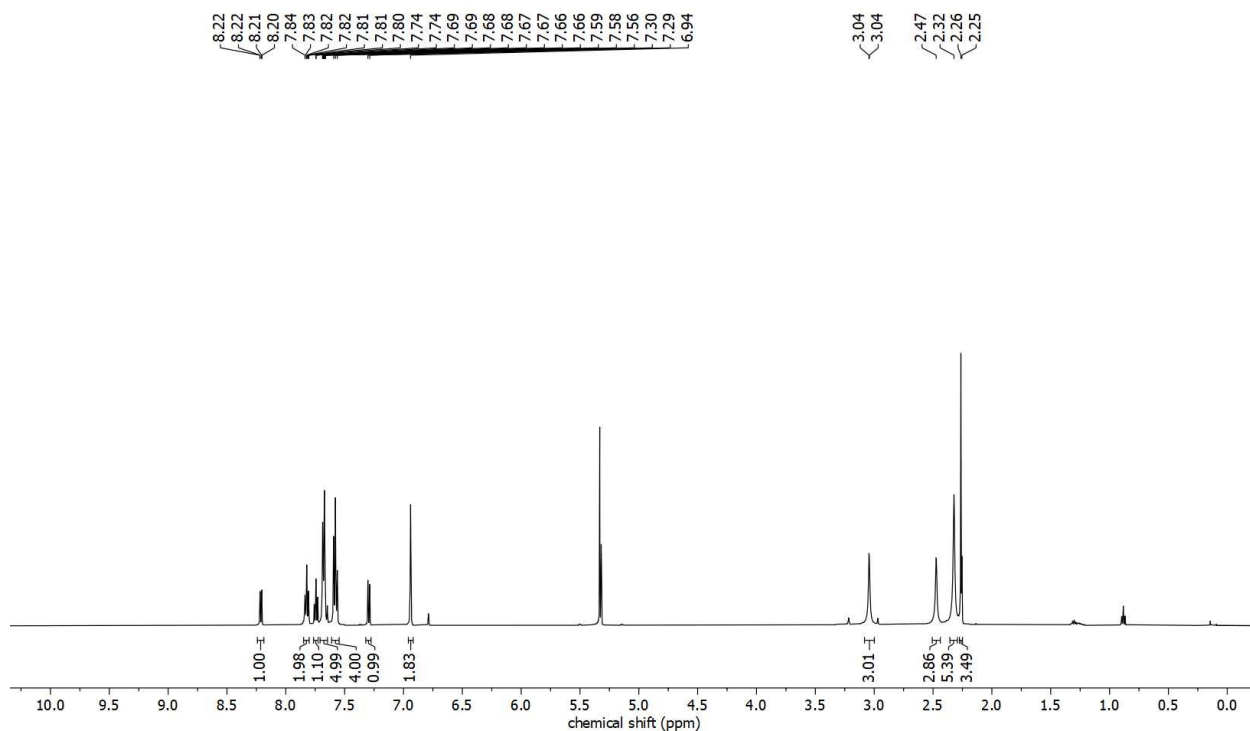

Figure S22:  $^1\text{H}$  NMR spectrum of **4B** recorded in  $\text{CD}_2\text{Cl}_2$ .

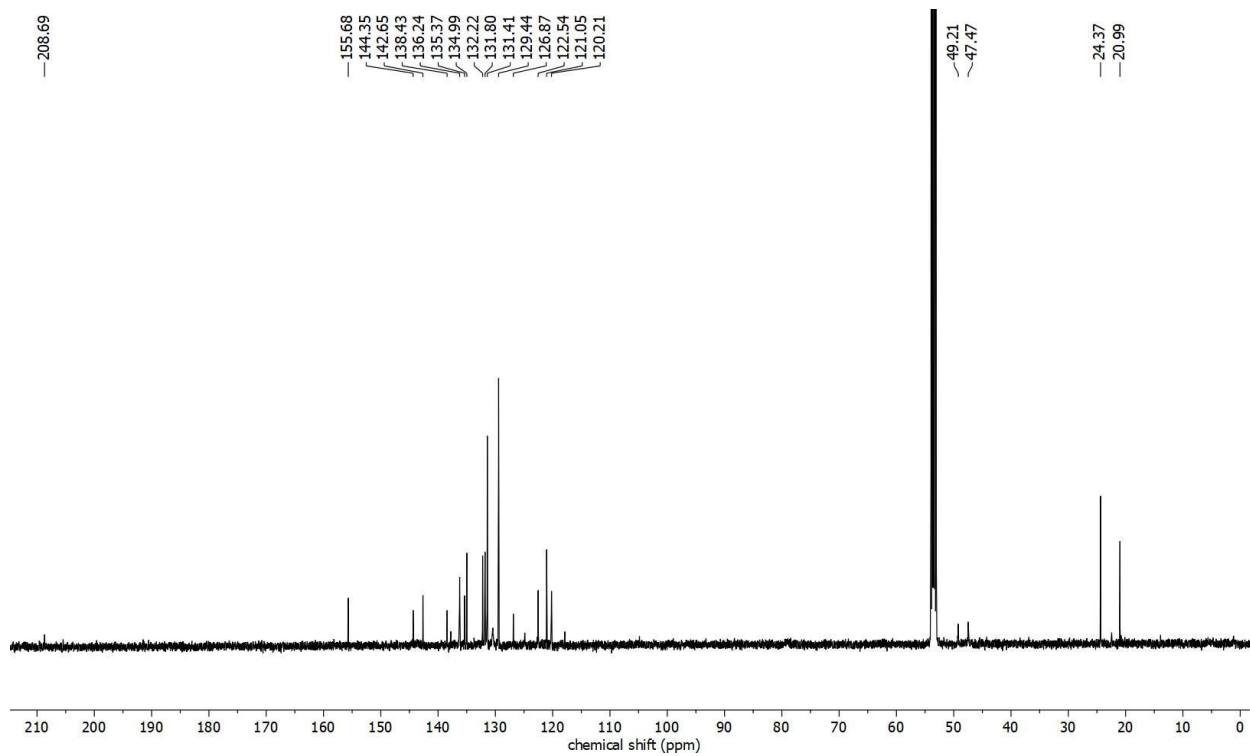

Figure S23:  $^{13}\text{C}\{^1\text{H}\}$  NMR spectrum of **4B** recorded in  $\text{CD}_2\text{Cl}_2$ .

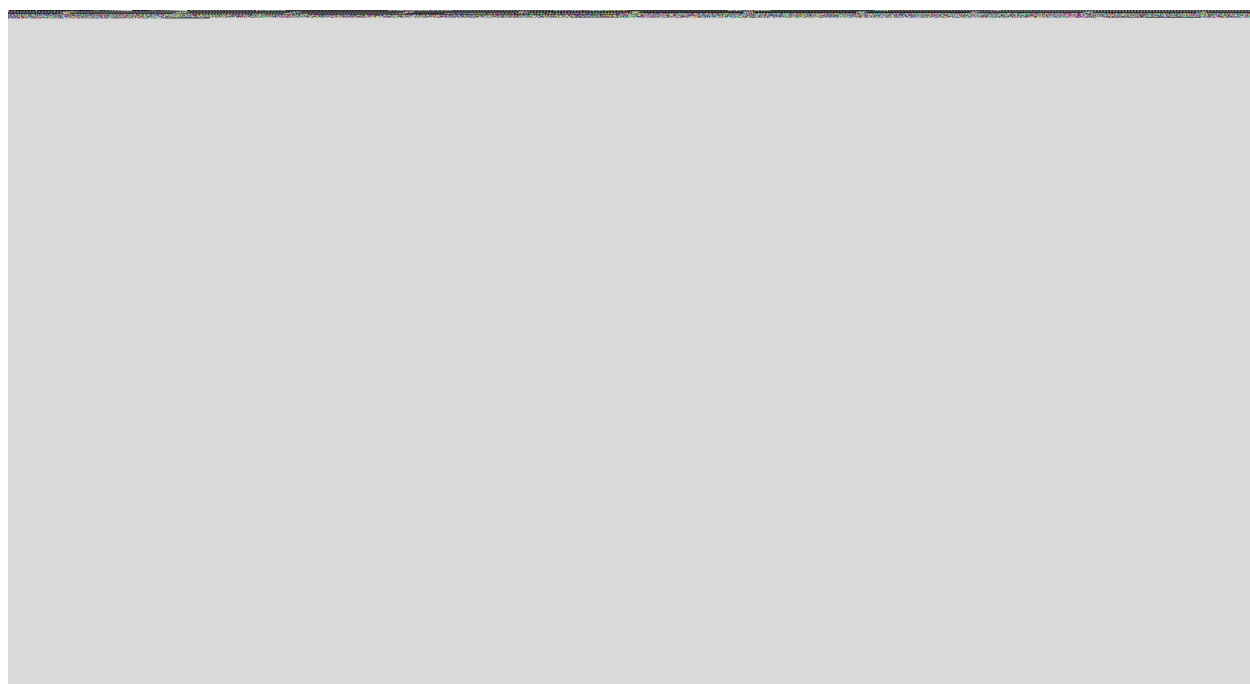

Figure S24:  $^{19}\text{F}$  NMR spectrum of **4B** recorded in  $\text{CD}_2\text{Cl}_2$ .

## 2.2 Solution NMR Studies for Carbonyl Activation

### Experimental Procedure

All the manipulations were carried out in argon atmosphere using Schlenk techniques and glovebox. J Young NMR tubes were oven dried at 200 °C before use. Ph<sub>2</sub>CO and PhCHO were dried before use.

[(NMe<sub>2</sub>CH<sub>2</sub>C<sub>6</sub>H<sub>4</sub>)(mesityl)Sb(PhCHO)][Al{O(CF<sub>3</sub>)<sub>3</sub>}<sub>4</sub>] or [(NMe<sub>2</sub>C<sub>6</sub>H<sub>4</sub>)(mesityl)Sb(PhCHO)][Al{O(CF<sub>3</sub>)<sub>3</sub>}<sub>4</sub>] were generated in situ by reacting equimolar amounts of **1A** or **1B**, PhCHO and [Ag(CH<sub>2</sub>Cl<sub>2</sub>)<sub>2</sub>][Al(OC(CF<sub>3</sub>)<sub>3</sub>)<sub>4</sub>] in 0.6 mL CD<sub>2</sub>Cl<sub>2</sub> in a J Young NMR tube. Reaction completion was monitored via NMR spectroscopy.

Table S1

| Compound                                                                                                                                  | <sup>13</sup> C{ <sup>1</sup> H} NMR chemical shift for CO δ (ppm) |
|-------------------------------------------------------------------------------------------------------------------------------------------|--------------------------------------------------------------------|
| PhCHO                                                                                                                                     | 192.6                                                              |
| SbCl <sub>3</sub> +PhCHO                                                                                                                  | 193.5                                                              |
| B(C <sub>6</sub> F <sub>5</sub> ) <sub>3</sub> +PhCHO                                                                                     | 199.7                                                              |
| [(NMe <sub>2</sub> CH <sub>2</sub> C <sub>6</sub> H <sub>4</sub> )(mesityl)Sb][Al{O(CF <sub>3</sub> ) <sub>3</sub> } <sub>4</sub> ]+PhCHO | 196.3                                                              |
| [(NMe <sub>2</sub> C <sub>6</sub> H <sub>4</sub> )(mesityl)Sb][Al{O(CF <sub>3</sub> ) <sub>3</sub> } <sub>4</sub> ]+ PhCHO                | 199.5                                                              |
| Ph <sub>2</sub> CO                                                                                                                        | 196.4                                                              |
| <b>4A</b>                                                                                                                                 | 202.7                                                              |
| <b>4B</b>                                                                                                                                 | 208.6                                                              |

#### SbCl<sub>3</sub>+PhCHO (1:1):

SbCl<sub>3</sub> (0.01 g, 0.043 mmol), PhCHO (4.46 μL, 0.043 mmol)

<sup>13</sup>C{<sup>1</sup>H} NMR (CD<sub>2</sub>Cl<sub>2</sub>, 125 MHz): δ 129.4 (*m*-C<sub>6</sub>H<sub>5</sub>), 130.2 (*o*-C<sub>6</sub>H<sub>5</sub>), 135.1 (*p*-C<sub>6</sub>H<sub>5</sub>), 136.6 (*i*-C<sub>6</sub>H<sub>5</sub>), 193.48 (CHO)

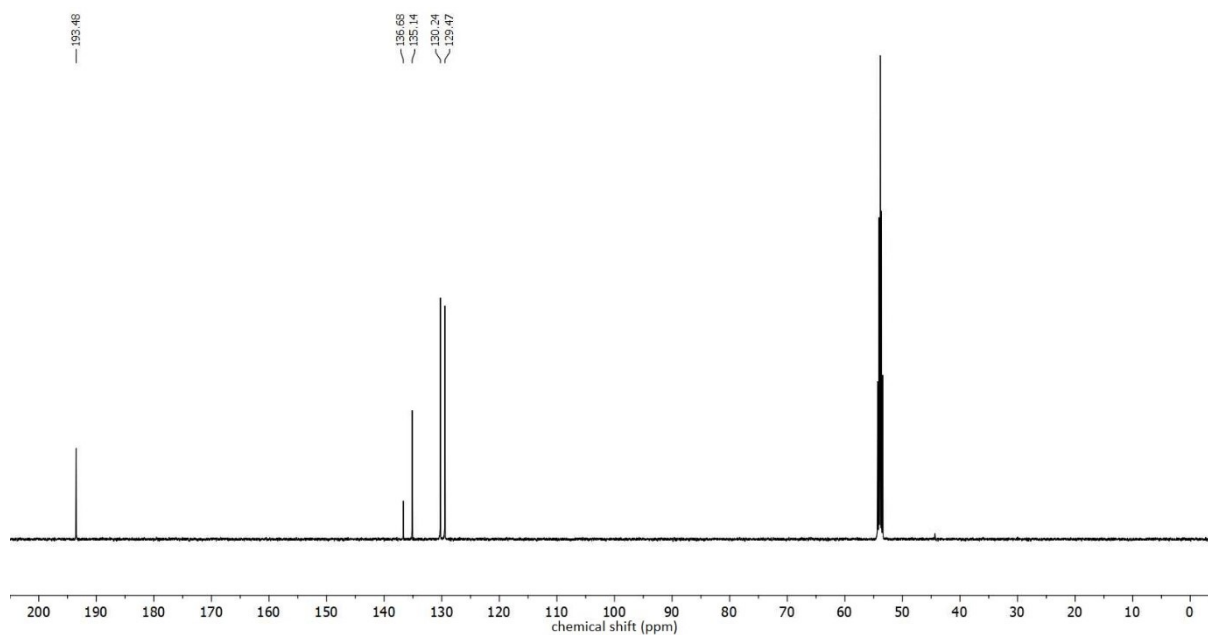

**Figure S25:**  $^{13}\text{C}\{^1\text{H}\}$  NMR spectra of  $\text{SbCl}_3+\text{PhCHO}$  recorded in  $\text{CD}_2\text{Cl}_2$ .

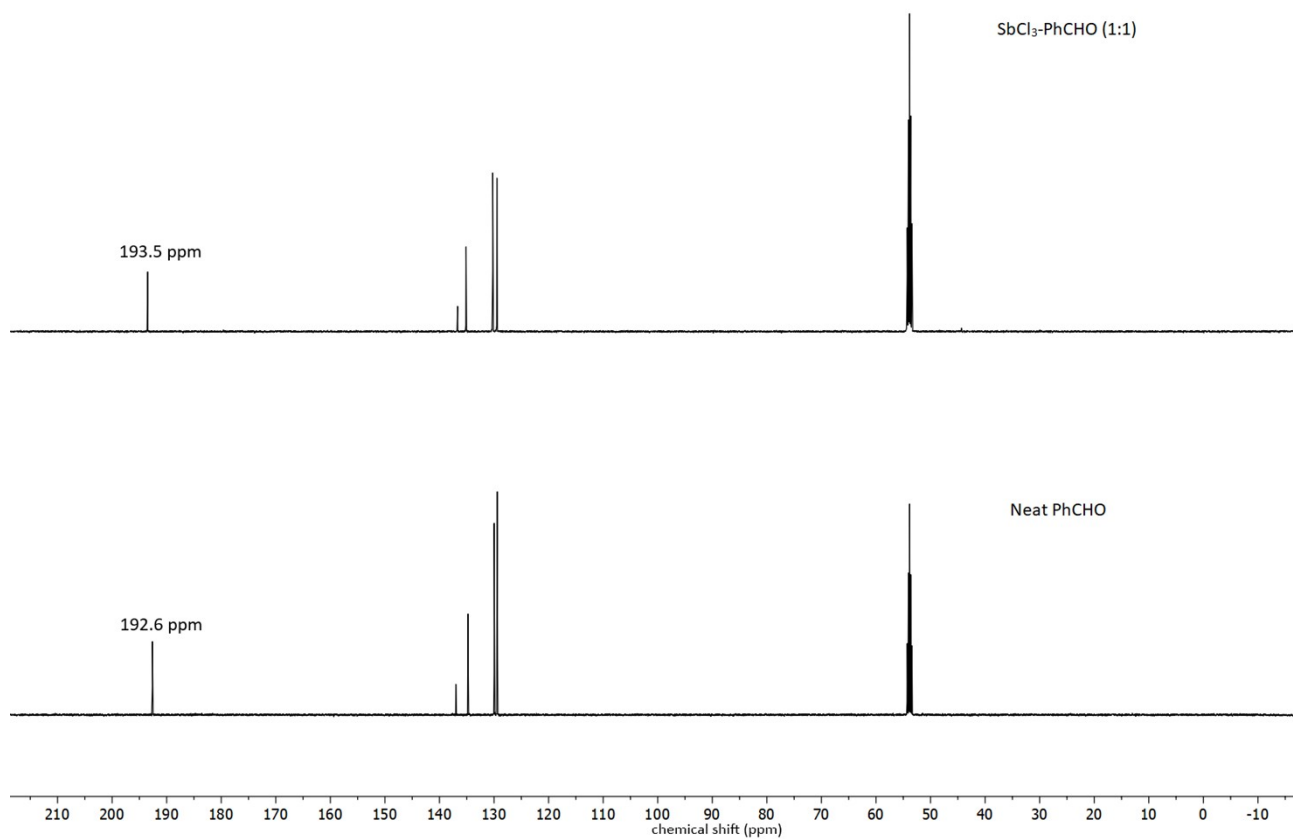

**Figure S26:** Stacked  $^{13}\text{C}\{^1\text{H}\}$  NMR spectra of neat PhCHO vs  $\text{SbCl}_3+\text{PhCHO}$  recorded in  $\text{CD}_2\text{Cl}_2$ .



B(C<sub>6</sub>F<sub>5</sub>)<sub>3</sub>+PhCHO (1:1):

B(C<sub>6</sub>F<sub>5</sub>)<sub>3</sub> (0.05 g, 0.098 mmol), PhCHO (10 μL, 0.098 mmol)

<sup>13</sup>C{<sup>1</sup>H} NMR (CD<sub>2</sub>Cl<sub>2</sub>, 125 MHz): δ 115.9 (*i*-C<sub>6</sub>F<sub>5</sub>), 130.9 (*i*-C<sub>6</sub>H<sub>5</sub>), 131.6 (*p*-C<sub>6</sub>H<sub>5</sub>), 136.8 (*o*-C<sub>6</sub>H<sub>5</sub>), 138.8 (*m*-C<sub>6</sub>F<sub>5</sub>), 142.7 (*m*-C<sub>6</sub>H<sub>5</sub>), 147.6 (*p*-C<sub>6</sub>F<sub>5</sub>), 149.5 (*o*-C<sub>6</sub>F<sub>5</sub>), 200.0 (CHO)

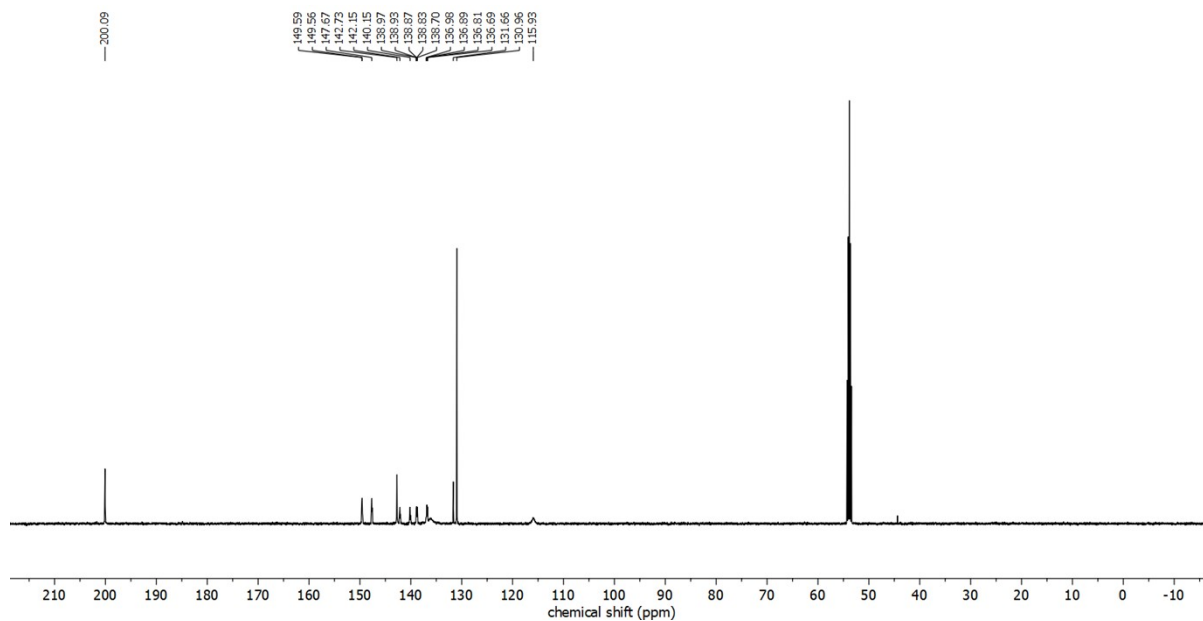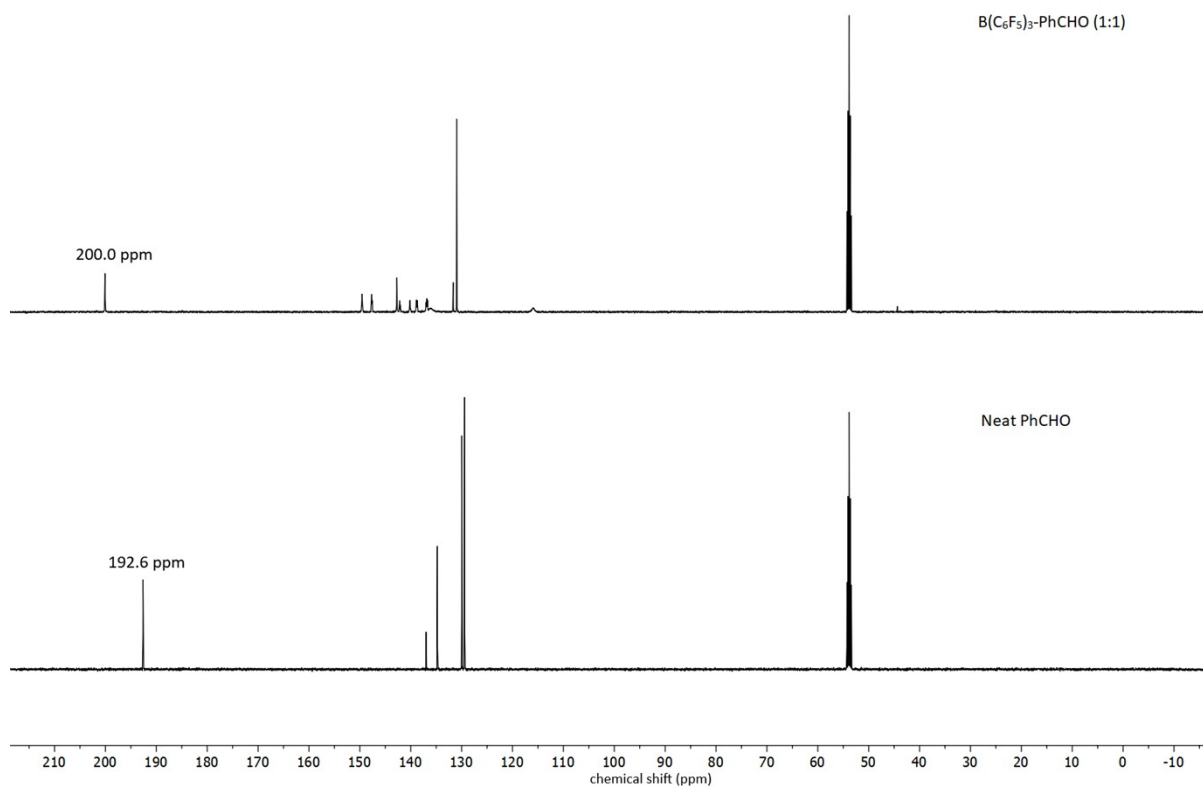

$[(\text{NMe}_2\text{CH}_2\text{C}_6\text{H}_4)(\text{mesityl})\text{Sb}(\text{PhCHO})][\text{Al}\{\text{O}(\text{C}(\text{CF}_3)_3)_4\}]$ :

**1A** (0.004 g, 009 mmol), PhCHO (0.99  $\mu\text{L}$ , 0.009 mmol),  $[\text{Ag}(\text{CH}_2\text{Cl}_2)_2][\text{Al}(\text{OC}(\text{CF}_3)_3)_4]$  (0.012 g, 0.009 mmol)

$^1\text{H}$  NMR ( $\text{CD}_2\text{Cl}_2$ , 500 MHz):  $\delta$  2.29 (s, br, 6H, *o*-CH<sub>3</sub>), 2.33 (s, 3H, *p*-CH<sub>3</sub>), 2.67 (s, 3H, NMe<sub>2</sub>), 2.90 (s, 3H, NMe<sub>2</sub>), AB spin system with A at 4.06, 4.09 (d, 1H, CH<sub>2</sub>,  $^3J_{\text{HH}} = 14.3$  Hz) and B at 4.24, 4.27 (d, 1H, CH<sub>2</sub>,  $^3J_{\text{HH}} = 14.3$  Hz), 7.02 (s, 2H, *m*-H (C<sub>6</sub>H<sub>11</sub>)), 7.51 (t, 4H, *m*-CH, PhCHO,  $^3J_{\text{HH}} = 7.9$  Hz), 7.58 (t, 1H, *p*-CH, PhCHO, 1H, t, C<sub>6</sub>H<sub>4</sub>,  $^3J_{\text{HH}} = 3.4$  Hz), 7.60 (d, 1H, *o*-CH, PhCHO,  $^3J_{\text{HH}} = 7.9$  Hz), 7.77 (t, 2H, C<sub>6</sub>H<sub>4</sub>,  $^3J_{\text{HH}} = 7.7$  Hz), 8.0 (d, 1H, C<sub>6</sub>H<sub>4</sub>), 9.72 (s, 1H, CHO)

$^{13}\text{C}\{^1\text{H}\}$  NMR ( $\text{CD}_2\text{Cl}_2$ , 125 MHz):  $\delta$  20.9 (*p*-CH<sub>3</sub>), 25.1 (*o*-CH<sub>3</sub>), 47.2 (NMe<sub>2</sub>), 48.8 (NMe<sub>2</sub>), 70.7 (CH<sub>2</sub>NMe<sub>2</sub>), 120.1, 122.5 (Al(OC(CF<sub>3</sub>)<sub>3</sub>)<sub>4</sub>,  $J_{\text{CF}} = 292.8$  Hz), 127.0 (c, C<sub>6</sub>H<sub>4</sub>), 129.5 (d, C<sub>6</sub>H<sub>4</sub>), 130.3 (*o*-C<sub>6</sub>H<sub>5</sub> PhCHO), 130.9 (*i*-C<sub>6</sub>H<sub>5</sub> PhCHO), 131.1 (*m*-CH, C<sub>9</sub>H<sub>11</sub>), 131.4 (e, C<sub>6</sub>H<sub>4</sub>), 135.2 (*m*-C<sub>6</sub>H<sub>5</sub> PhCHO), 135.4 (*p*-C<sub>6</sub>H<sub>5</sub> PhCHO), 136.7 (g, C<sub>9</sub>H<sub>11</sub>), 138.4 (i, C<sub>6</sub>H<sub>11</sub>), 142.8 (b, C<sub>6</sub>H<sub>4</sub>), 143.4 (f), 145.4 (h, C<sub>9</sub>H<sub>11</sub>), 146.0 (a, C<sub>6</sub>H<sub>4</sub>), 196.3 (CHO)

$^{19}\text{F}$  NMR ( $\text{CD}_2\text{Cl}_2$ , 471 MHz):  $\delta$  -75.7 (s, Al(OC(CF<sub>3</sub>)<sub>3</sub>)<sub>4</sub>)

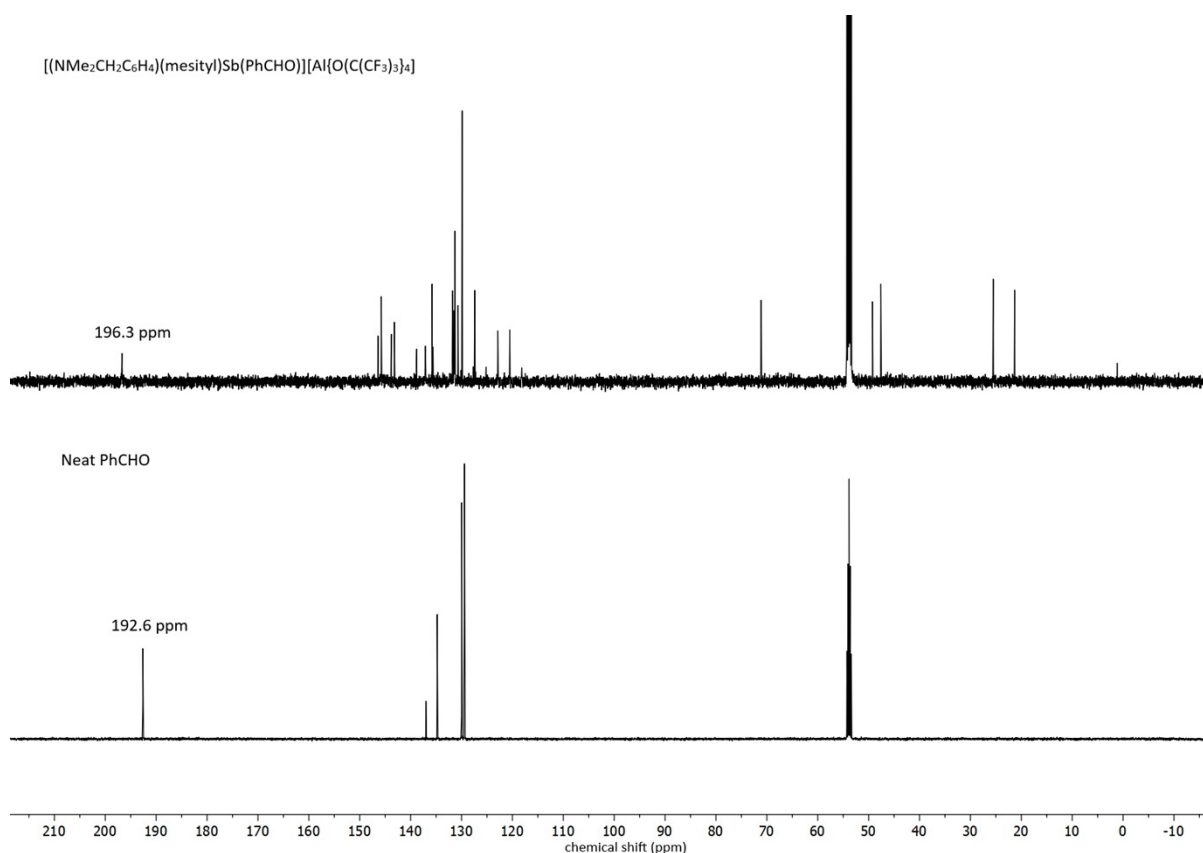

**Figure S29:** Stacked  $^{13}\text{C}\{^1\text{H}\}$  NMR spectra of neat PhCHO vs  $[(\text{NMe}_2\text{CH}_2\text{C}_6\text{H}_4)(\text{mesityl})\text{Sb}(\text{PhCHO})][\text{Al}\{\text{O}(\text{C}(\text{CF}_3)_3)_4\}]$  recorded in  $\text{CD}_2\text{Cl}_2$ .

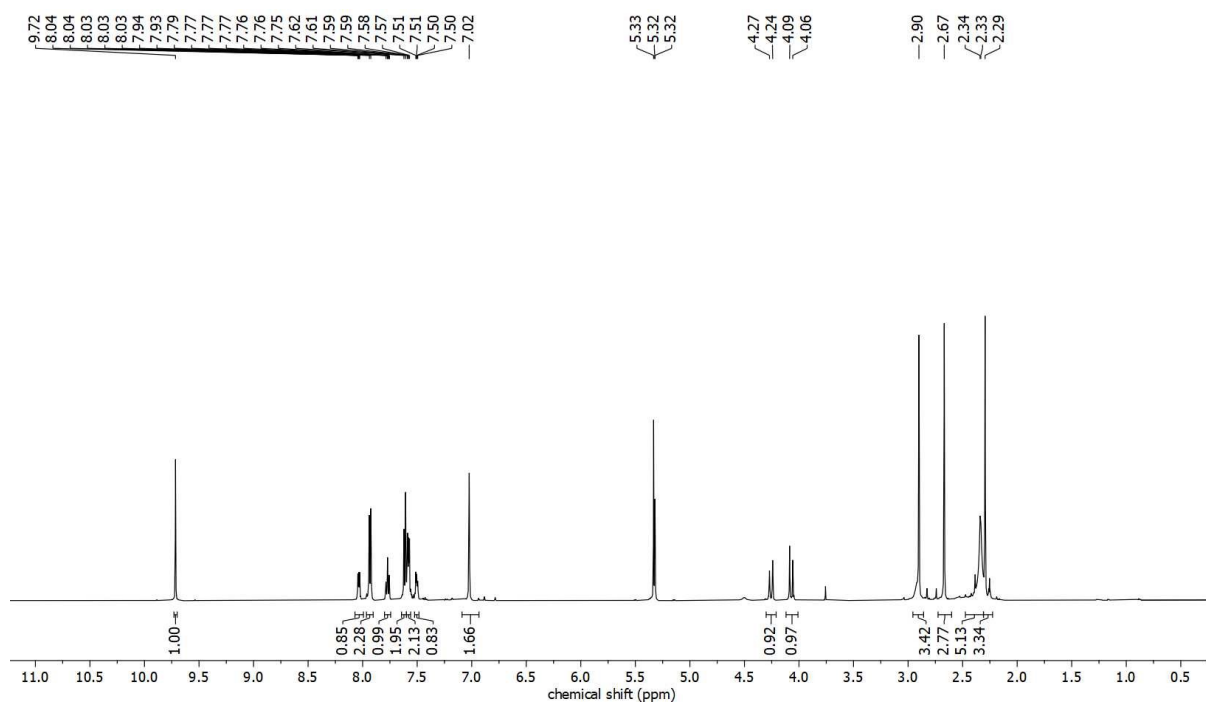

**Figure S30:**  $^1\text{H}$  NMR spectrum of  $[(\text{NMe}_2\text{CH}_2\text{C}_6\text{H}_4)(\text{mesityl})\text{Sb}(\text{PhCHO})][\text{Al}\{\text{O}(\text{CF}_3)_3\}_4]$  recorded in  $\text{CD}_2\text{Cl}_2$ .

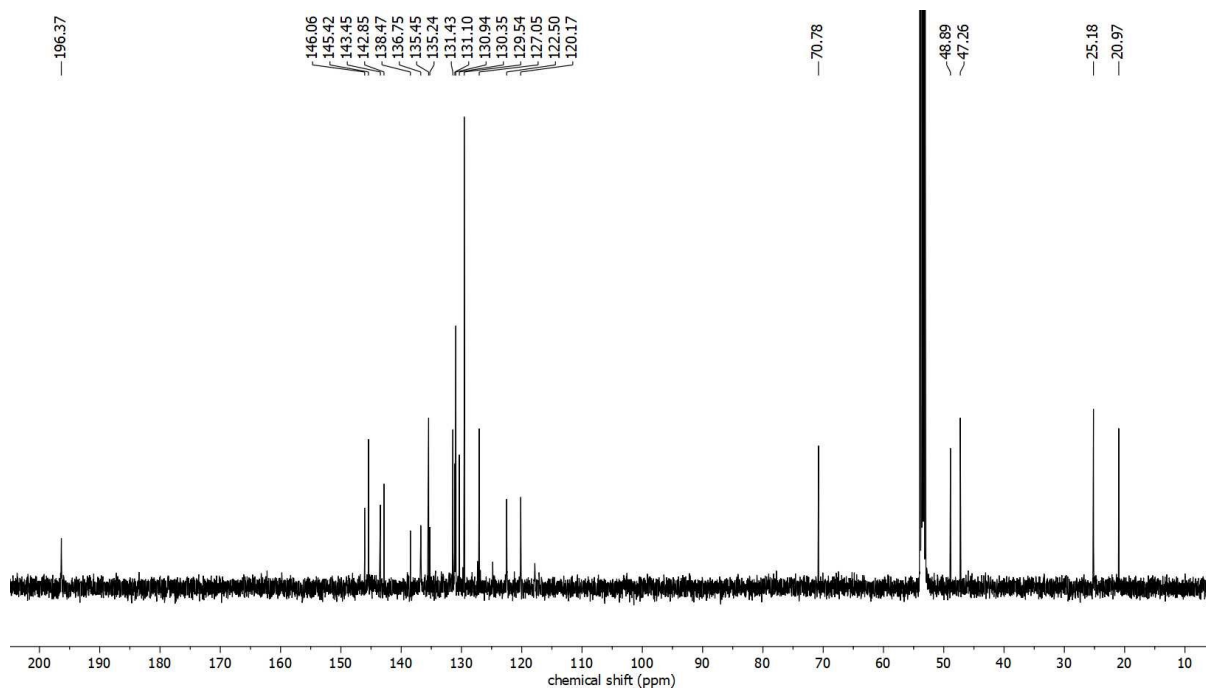

**Figure S31:**  $^{13}\text{C}\{^1\text{H}\}$  NMR spectrum of  $[(\text{NMe}_2\text{CH}_2\text{C}_6\text{H}_4)(\text{mesityl})\text{Sb}(\text{PhCHO})][\text{Al}\{\text{O}(\text{CF}_3)_3\}_4]$  recorded in  $\text{CD}_2\text{Cl}_2$ .

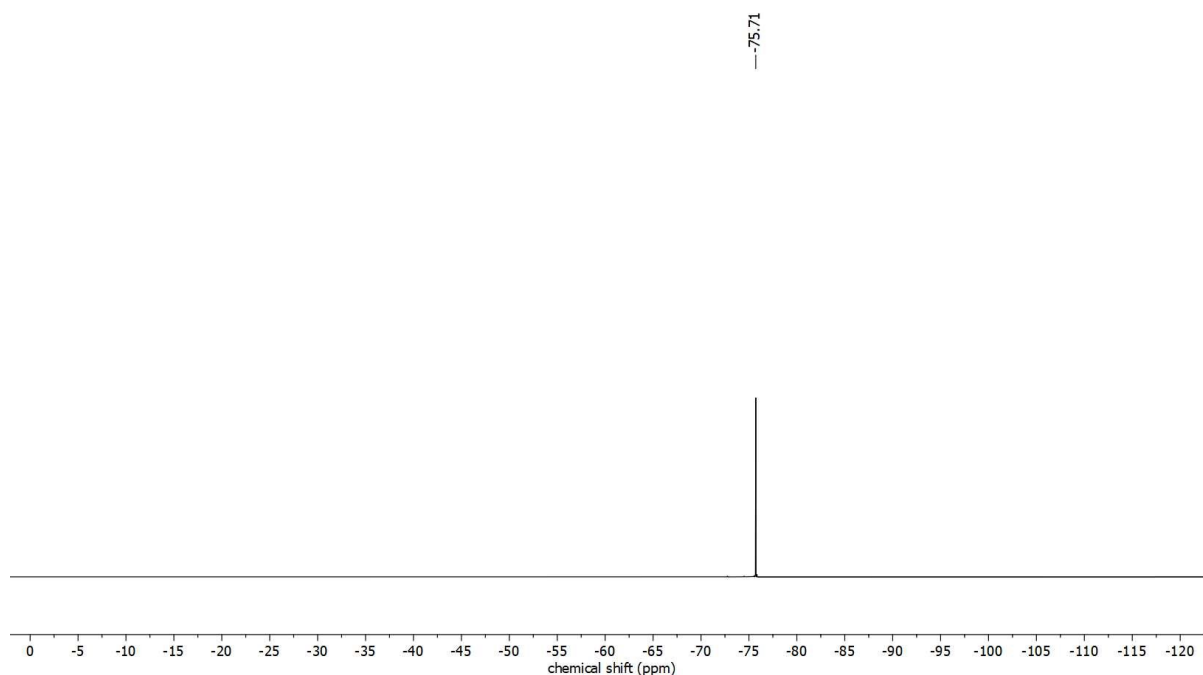

**Figure S32:**  $^{19}\text{F}$  NMR spectrum of  $[(\text{NMe}_2\text{CH}_2\text{C}_6\text{H}_4)(\text{mesityl})\text{Sb}(\text{PhCHO})][\text{Al}\{\text{O}(\text{C}(\text{CF}_3)_3)_4\}]$  recorded in  $\text{CD}_2\text{Cl}_2$ .

$[(\text{NMe}_2\text{C}_6\text{H}_4)(\text{mesityl})\text{Sb}(\text{PhCHO})][\text{Al}\{\text{O}(\text{C}(\text{CF}_3)_3)_4\}]$ :

**1B** (0.004 g, 0.01 mmol), PhCHO (1.03  $\mu\text{L}$ , 0.01 mmol),  $[\text{Ag}(\text{CH}_2\text{Cl}_2)_2][\text{Al}(\text{OC}(\text{CF}_3)_3)_4]$  (0.012 g, 0.01 mmol)

$^1\text{H}$  NMR ( $\text{CD}_2\text{Cl}_2$ , 500 MHz):  $\delta$  2.27 (s, 3H, *p*- $\text{CH}_3$ ), 2.36 (s, 3H, *o*- $\text{CH}_3$ ), 2.43 (s, 3H, *o*- $\text{CH}_3$ ) 2.78 (s, 3H,  $\text{NMe}_2$ ), 3.21 (s, 3H,  $\text{NMe}_2$ ), 6.99 (s, 2H, *m*-H ( $\text{C}_6\text{H}_{11}$ )), 7.31 (t, 1H, t,  $\text{C}_6\text{H}_4$ ,  $^3J_{\text{HH}} = 6.4$  Hz), 7.62 (m, 4H, *o*-CH, PhCHO,  $^3J_{\text{HH}} = 7.8$  Hz), 7.79 (t, 2H,  $\text{C}_6\text{H}_4$ ,  $^3J_{\text{HH}} = 6.9$  Hz), 7.96 (m, 1H,  $\text{C}_6\text{H}_4$ , 1H, *p*-CH, PhCHO,  $^3J_{\text{HH}} = 7.5$  Hz), 9.87 (s, 1H, CHO)

$^{13}\text{C}\{^1\text{H}\}$  NMR ( $\text{CD}_2\text{Cl}_2$ , 125 MHz):  $\delta$  21.0 (*p*- $\text{CH}_3$ ), 23.9 (*o*- $\text{CH}_3$ ), 46.6 ( $\text{NMe}_2$ ), 120.1, 122.9 ( $\text{Al}(\text{OC}(\text{CF}_3)_3)_4$ ,  $J_{\text{CF}} = 292.8$  Hz), 122.4 (c,  $\text{C}_6\text{H}_4$ ), 126.8 (d,  $\text{C}_6\text{H}_4$ ), 129.9 (*o*- $\text{C}_6\text{H}_5$  PhCHO), 131.8 (*i*- $\text{C}_6\text{H}_5$  PhCHO), 132.2 (*m*-CH,  $\text{C}_9\text{H}_{11}$ ), 132.3 (e,  $\text{C}_6\text{H}_4$ ), 134.6 (*m*- $\text{C}_6\text{H}_5$  PhCHO), 134.3 (*p*- $\text{C}_6\text{H}_5$  PhCHO), 134.6 (g,  $\text{C}_9\text{H}_{11}$ ), 137.5 (i,  $\text{C}_6\text{H}_{11}$ ), 138.6 (b,  $\text{C}_6\text{H}_4$ ), 142.9 (f,  $\text{C}_9\text{H}_{11}$ ), 143.0 (h,  $\text{C}_9\text{H}_{11}$ ), 155.4 (a,  $\text{C}_6\text{H}_4$ ), 199.5 (CHO)

$^{19}\text{F}$  NMR ( $\text{CD}_2\text{Cl}_2$ , 471 MHz):  $\delta$  -75.9 (s,  $\text{Al}(\text{OC}(\text{CF}_3)_3)_4$ )

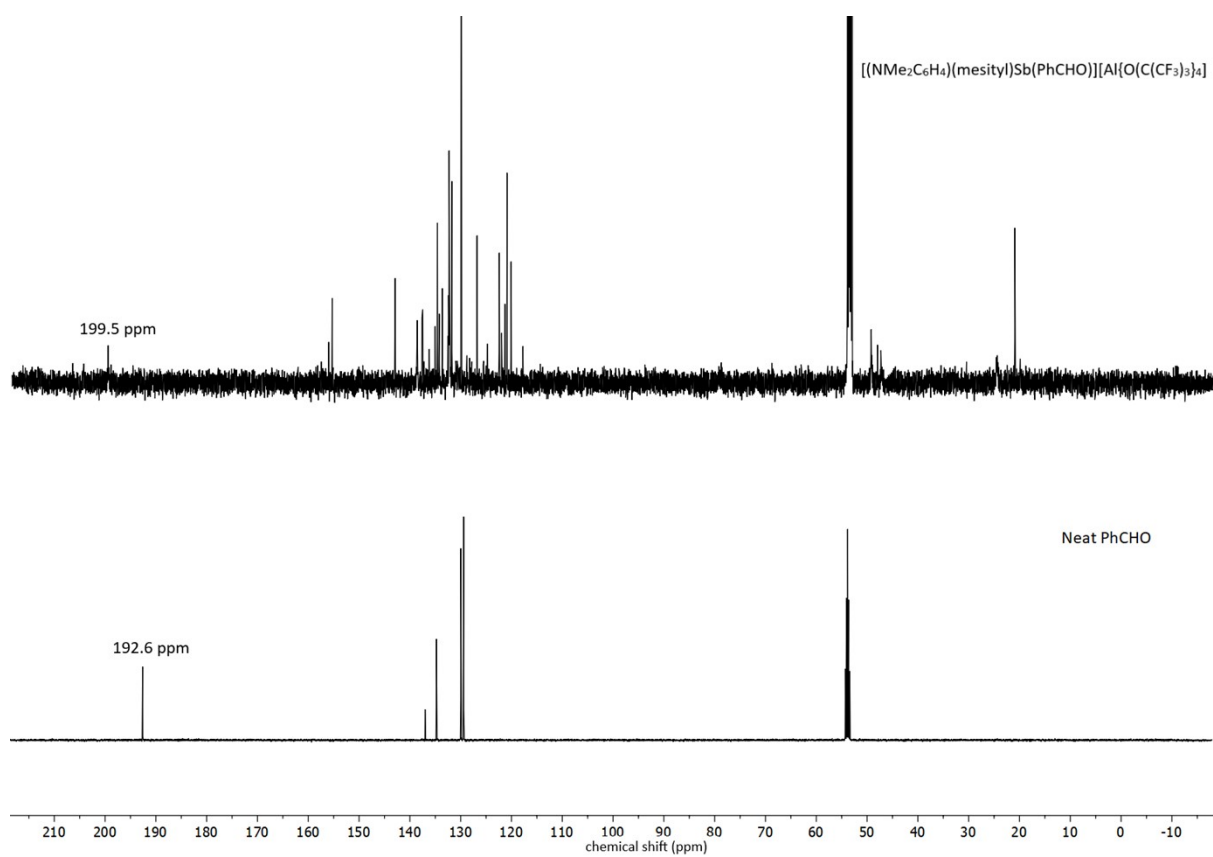

**Figure S33:** Stacked  $^{13}\text{C}\{^1\text{H}\}$  NMR spectra of Neat PhCHO vs  $[(\text{NMe}_2\text{C}_6\text{H}_4)(\text{mesityl})\text{Sb}(\text{PhCHO})][\text{Al}\{\text{O}(\text{CF}_3)_3\}_4]$  recorded in  $\text{CD}_2\text{Cl}_2$ .

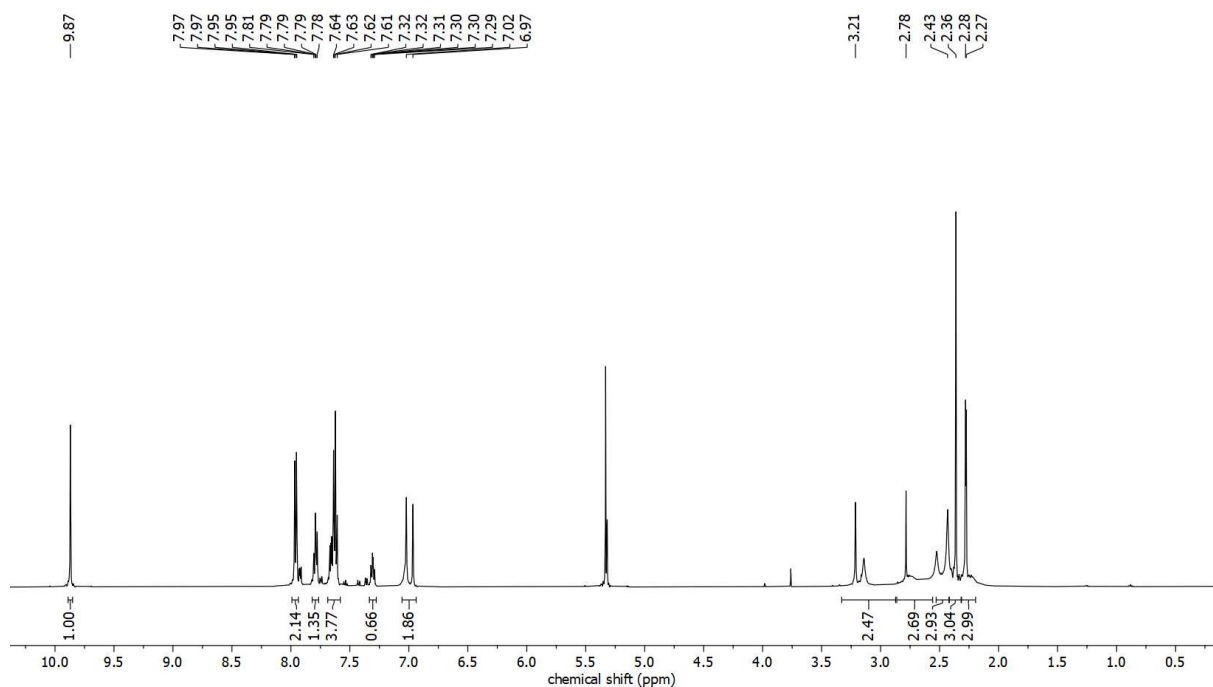

**Figure S34:**  $^1\text{H}$  NMR spectrum of  $[(\text{NMe}_2\text{C}_6\text{H}_4)(\text{mesityl})\text{Sb}(\text{PhCHO})][\text{Al}\{\text{O}(\text{CF}_3)_3\}_4]$  recorded in  $\text{CD}_2\text{Cl}_2$ .

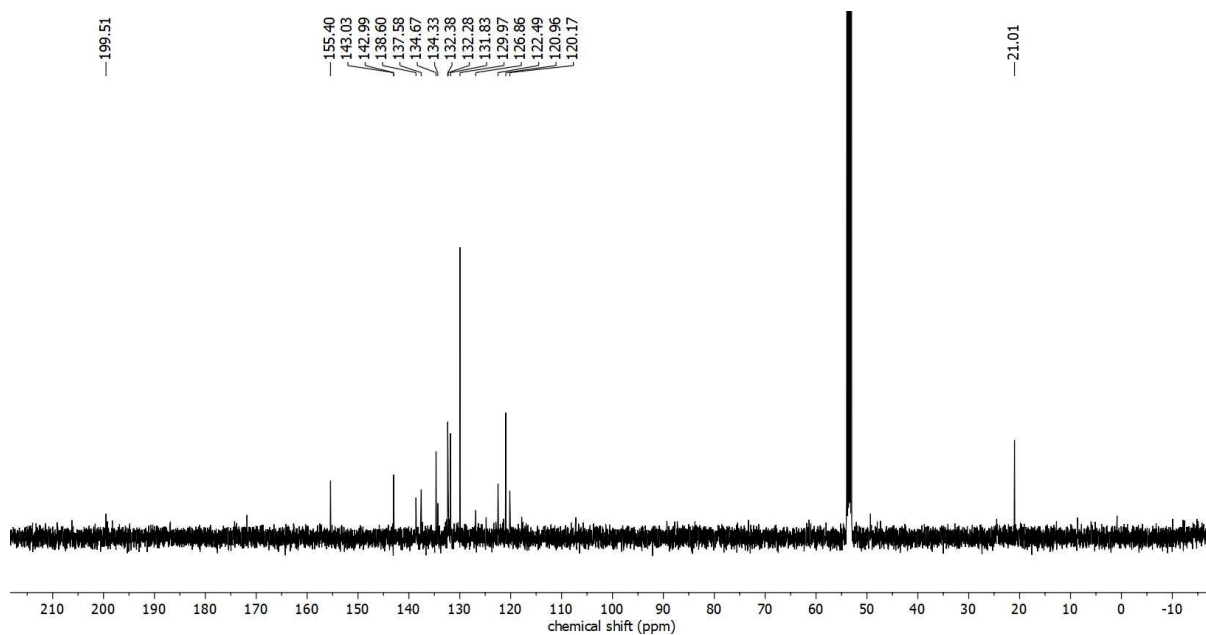

**Figure S35:**  $^{13}\text{C}\{^1\text{H}\}$  NMR spectrum of  $[(\text{NMe}_2\text{C}_6\text{H}_4)(\text{mesityl})\text{Sb}(\text{PhCHO})][\text{Al}\{\text{O}(\text{C}(\text{CF}_3)_3)_4\}]$  recorded in  $\text{CD}_2\text{Cl}_2$ .

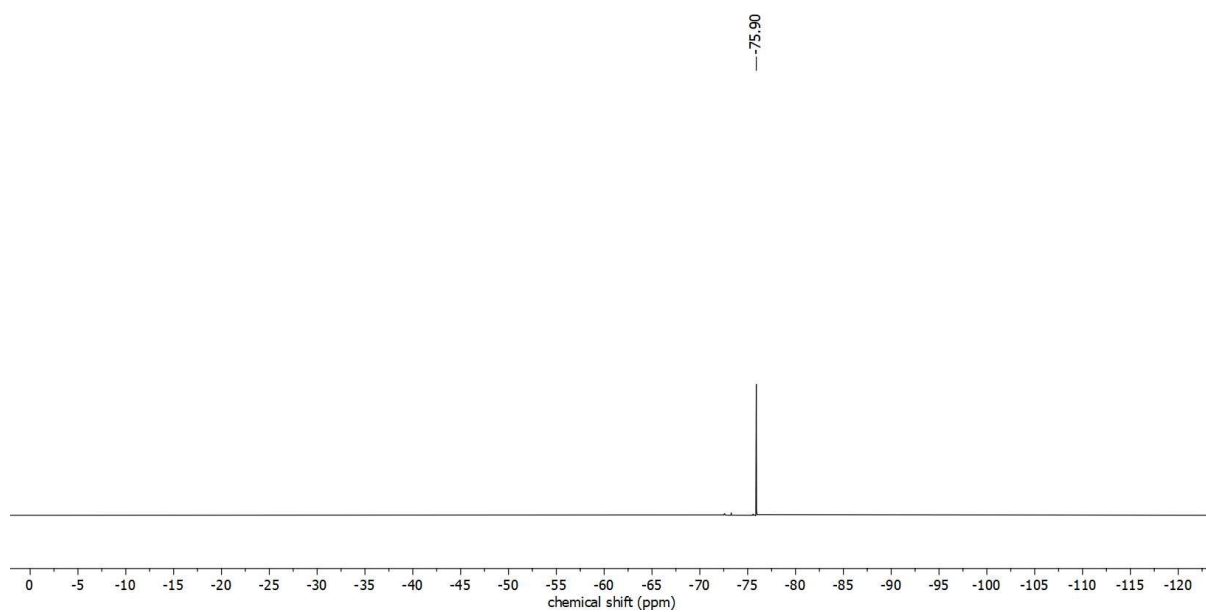

**Figure S36:**  $^{19}\text{F}$  NMR spectrum of  $[(\text{NMe}_2\text{C}_6\text{H}_4)(\text{mesityl})\text{Sb}(\text{PhCHO})][\text{Al}\{\text{O}(\text{C}(\text{CF}_3)_3)_4\}]$  recorded in  $\text{CD}_2\text{Cl}_2$ .

**4A:**

**1A** (0.1 g, 0.243 mmol),  $\text{Ph}_2\text{CO}$  (0.044 g, 0.085 mmol) and  $[\text{Ag}(\text{CH}_2\text{Cl}_2)_2][\text{Al}(\text{OC}(\text{CF}_3)_3)_4]$  (0.303 g, 0.243 mmol)

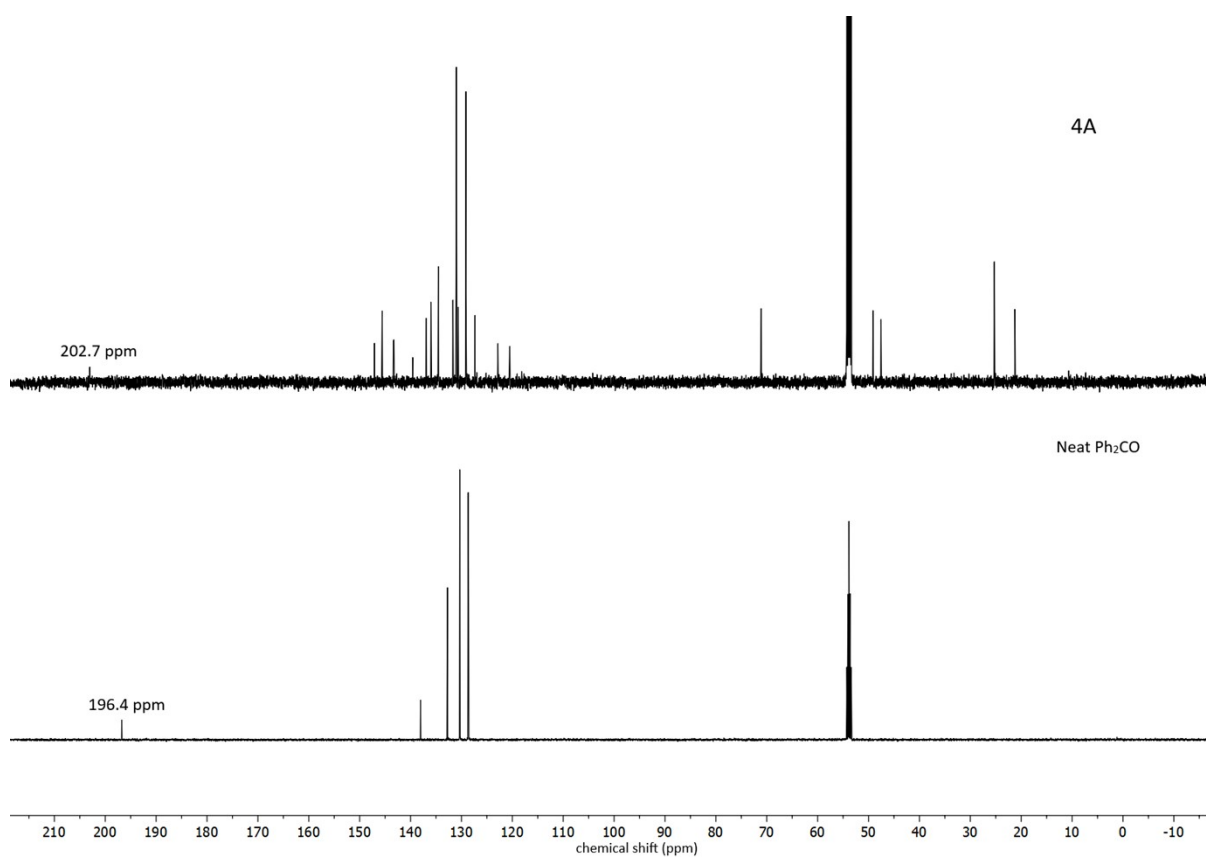

**Figure S37:** Stacked  $^{13}\text{C}\{^1\text{H}\}$  NMR spectra of Neat Ph<sub>2</sub>CO vs **4A** recorded in CD<sub>2</sub>Cl<sub>2</sub>.

**4B:**

**1B** (0.040 g, 0.1 mmol), Ph<sub>2</sub>CO (0.018 g, 0.1 mmol), [Ag(CH<sub>2</sub>Cl<sub>2</sub>)<sub>2</sub>][Al(OC(CF<sub>3</sub>)<sub>3</sub>)<sub>4</sub>] (0.126 g, 0.1 mmol)

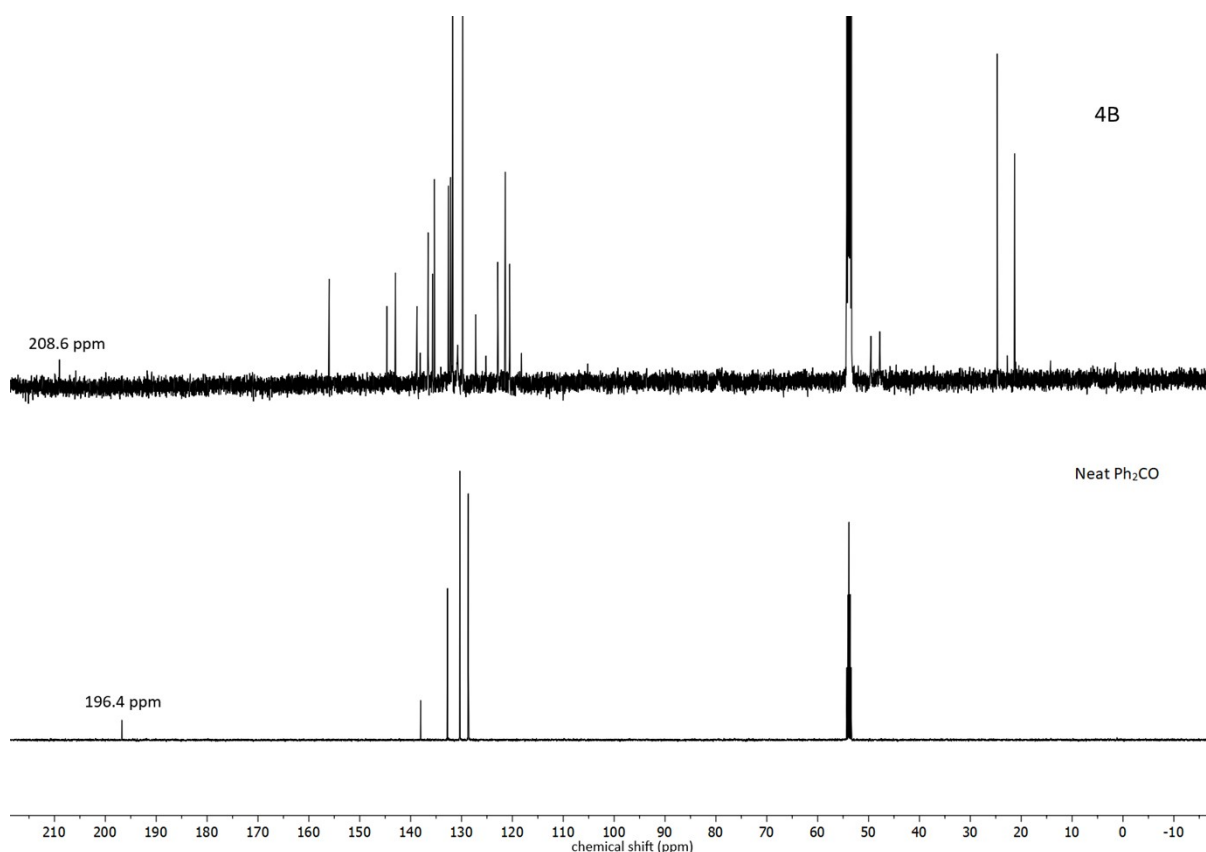

**Figure S38:** Stacked  $^{13}\text{C}\{^1\text{H}\}$  NMR spectra of neat Ph<sub>2</sub>CO vs **4B** recorded in CD<sub>2</sub>Cl<sub>2</sub>.

## 2.3 Reactivities Studies

### Catalytic Hydrosilylation of Benzaldehyde

#### Experimental Procedure

All the manipulations were carried out in argon atmosphere using Schlenk techniques and glovebox. J Young NMR tubes were oven dried at 200 °C before use. Ph<sub>2</sub>CO, PhCHO and Et<sub>3</sub>SiH were dried before use.

1 mol % of  $[(\text{NMe}_2\text{CH}_2\text{C}_6\text{H}_4)(\text{mesityl})\text{Sb}(\text{PhCHO})][\text{Al}\{\text{O}(\text{C}(\text{CF}_3)_3)_4\}]$  or  $[(\text{NMe}_2\text{C}_6\text{H}_4)(\text{mesityl})\text{Sb}(\text{PhCHO})][\text{Al}\{\text{O}(\text{C}(\text{CF}_3)_3)_4\}]$  was generated in situ with **1A** or **1B** in presence of PhCHO using  $[\text{Ag}(\text{CH}_2\text{Cl}_2)_2][\text{Al}(\text{OC}(\text{CF}_3)_3)_4]$  in 0.6 mL CD<sub>2</sub>Cl<sub>2</sub> in a J Young NMR tube. Reaction completion was monitored via NMR spectroscopy. AgCl was removed from the solution by filtration to another J Young NMR tube after 2 h. PhCHO was then loaded into NMR tube and 0.9 equivalent of Et<sub>3</sub>SiH with respect to PhCHO was added to the reaction mixture inside glovebox. NMR tube was then sealed and reaction was monitored by  $^1\text{H}$  NMR until the hydrosilylation reaction reached completion.

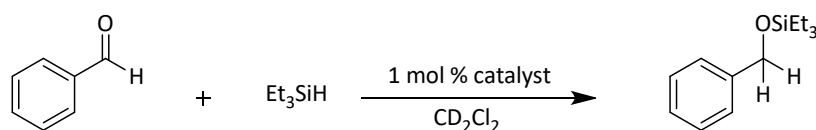

**Scheme S9**



Using 1A:

PhCHO (24.85  $\mu$ L, 0.243 mmol), **1A** (0.001 g, 0.002 mmol),  $[\text{Ag}(\text{CH}_2\text{Cl}_2)_2][\text{Al}(\text{OC}(\text{CF}_3)_3)_4]$  (0.003 g, 0.002 mmol),  $\text{Et}_3\text{SiH}$  (35.01  $\mu$ L, 0.219 mmol)

$^1\text{H}$  NMR ( $\text{CD}_2\text{Cl}_2$ , 500 MHz):  $\delta$  0.6 (q, 6H,  $\text{OSiCH}_2\text{CH}_3$ ), 0.99 (t, 9H,  $\text{OSiCH}_2\text{CH}_3$ ), 4.59 (s, 2H,  $\text{OCH}_2\text{SiEt}_3$ ), 7.33 (m, 1H, p- $\text{C}_6\text{H}_4$ ), 7.40 (m, 4H, o, m- $\text{C}_6\text{H}_4$ )

$^{13}\text{C}\{^1\text{H}\}$  NMR ( $\text{CD}_2\text{Cl}_2$ , 126 MHz):  $\delta$  4.5 (s,  $\text{OSiCH}_2\text{CH}_3$ ), 6.7 (s,  $\text{OSiCH}_2\text{CH}_3$ ), 64.7 (s,  $\text{OCH}_2$ ), 127.1 (s, o- $\text{C}_6\text{H}_5$ ), 128.2 (p- $\text{C}_6\text{H}_5$ ), 129.1 (s, m- $\text{C}_6\text{H}_5$ ), 138.6 (s, i- $\text{C}_6\text{H}_5$ )

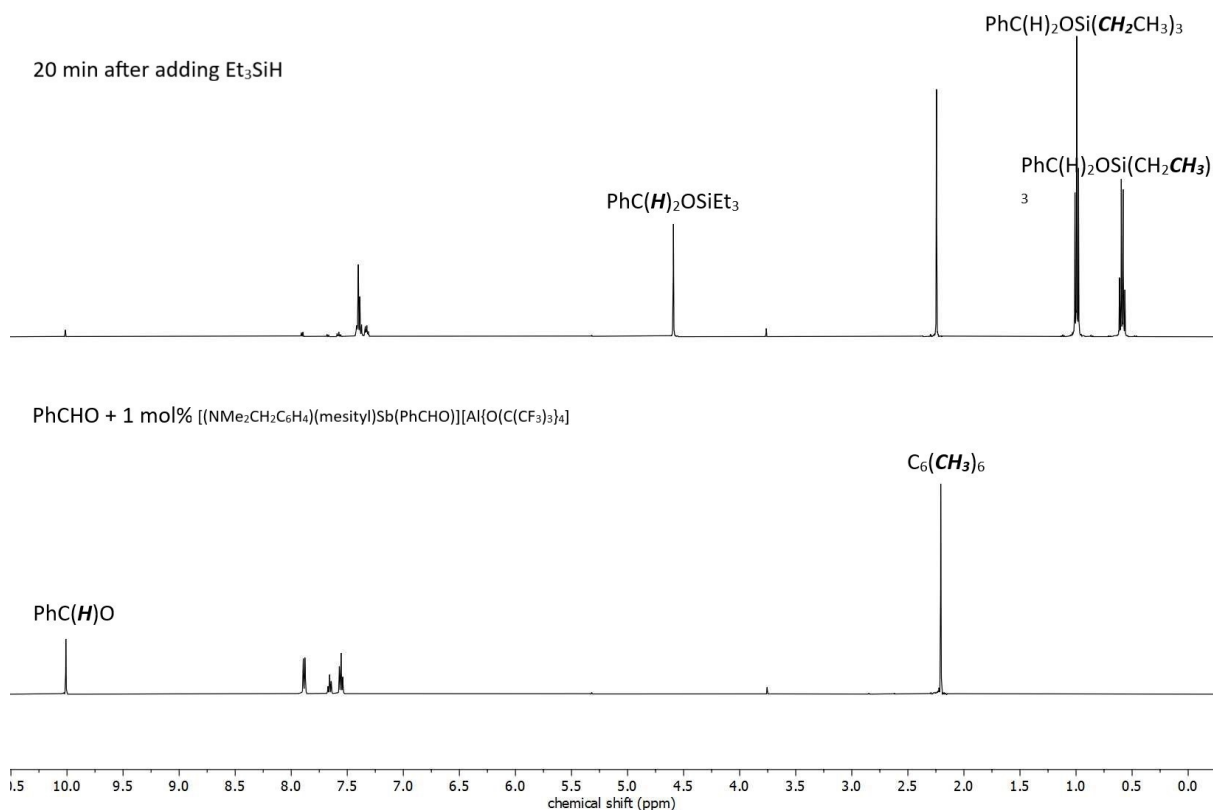

**Figure S39:** Stacked  $^1\text{H}$  NMR spectra for hydrosilylation of PhCHO using 1 mol %  $[(\text{NMe}_2\text{CH}_2\text{C}_6\text{H}_4)(\text{mesityl})\text{Sb}(\text{PhCHO})][\text{Al}\{\text{O}(\text{C}(\text{CF}_3)_3)_4\}]$  recorded in  $\text{CD}_2\text{Cl}_2$ . Complete consumption of  $\text{Et}_3\text{SiH}$  resulted in >98% conversion to  $\text{PhC}(\text{H})_2\text{OSiEt}_3$ . Hexamethylbenzene was used as internal reference.

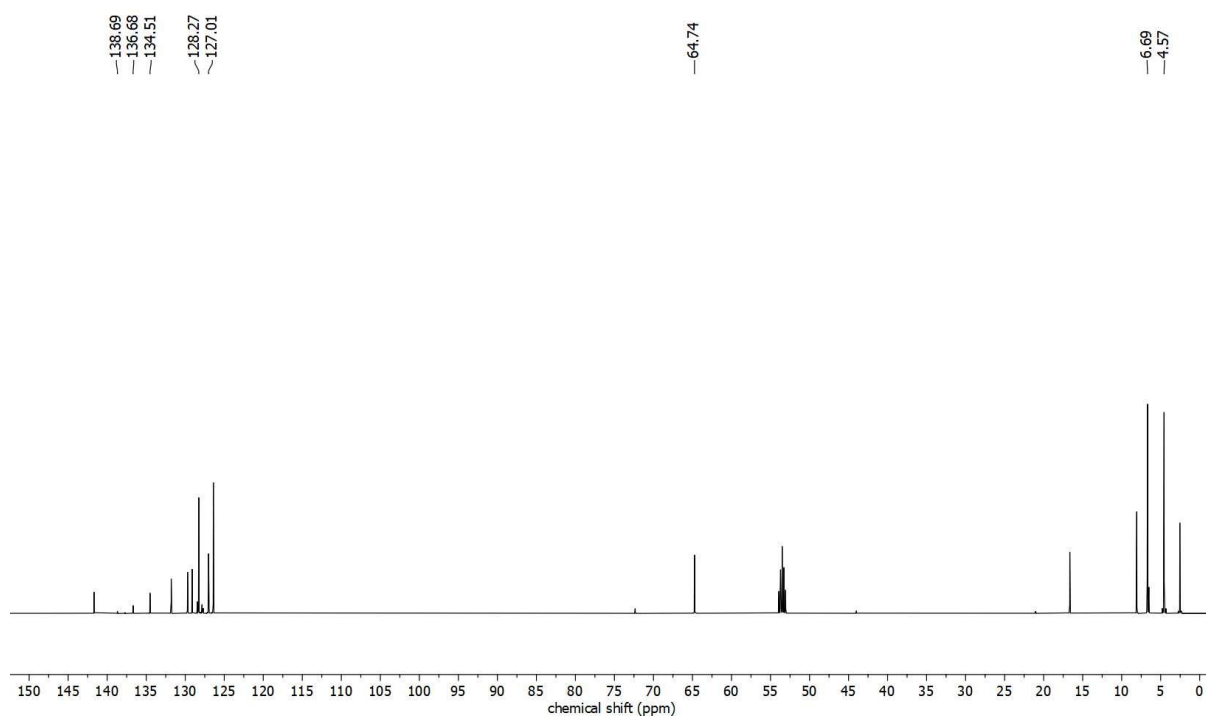

**Figure S40:**  $^{13}\text{C}\{^1\text{H}\}$  NMR spectra for hydrosilylation of PhCHO using 1 mol %  $[(\text{NMe}_2\text{CH}_2\text{C}_6\text{H}_4)(\text{mesityl})\text{Sb}(\text{PhCHO})][\text{Al}\{\text{O}(\text{C}(\text{CF}_3)_3\}_4]$  recorded in  $\text{CD}_2\text{Cl}_2$ .

**Using 1B:**

PhCHO (25.73  $\mu\text{L}$ , 0.252 mmol), **1A** (0.001 g, 0.002 mmol),  $[\text{Ag}(\text{CH}_2\text{Cl}_2)_2][\text{Al}(\text{OC}(\text{CF}_3)_3)_4]$  (0.003 g, 0.002 mmol),  $\text{Et}_3\text{SiH}$  (36.25  $\mu\text{L}$ , 0.226 mmol)

$^1\text{H}$  NMR ( $\text{CD}_2\text{Cl}_2$ , 500 MHz):  $\delta$  0.6 (q, 6H,  $\text{OSiCH}_2\text{CH}_3$ ), 0.99 (t, 9H,  $\text{OSiCH}_2\text{CH}_3$ ), 4.59 (s, 2H,  $\text{OCH}_2\text{SiEt}_3$ ), 7.33 (m, 1H, p- $\text{C}_6\text{H}_4$ ), 7.40 (m, 4H, o, m- $\text{C}_6\text{H}_4$ )

$^{13}\text{C}\{^1\text{H}\}$  NMR ( $\text{CD}_2\text{Cl}_2$ , 126 MHz):  $\delta$  5.3 (s,  $\text{OSiCH}_2\text{CH}_3$ ), 7.4 (s,  $\text{OSiCH}_2\text{CH}_3$ ), 65.4 (s,  $\text{OCH}_2$ ), 127.1 (s, o- $\text{C}_6\text{H}_5$ ), 128.5 (p- $\text{C}_6\text{H}_5$ ), 129.1 (s, m- $\text{C}_6\text{H}_5$ ), 138.4 (s, i- $\text{C}_6\text{H}_5$ )

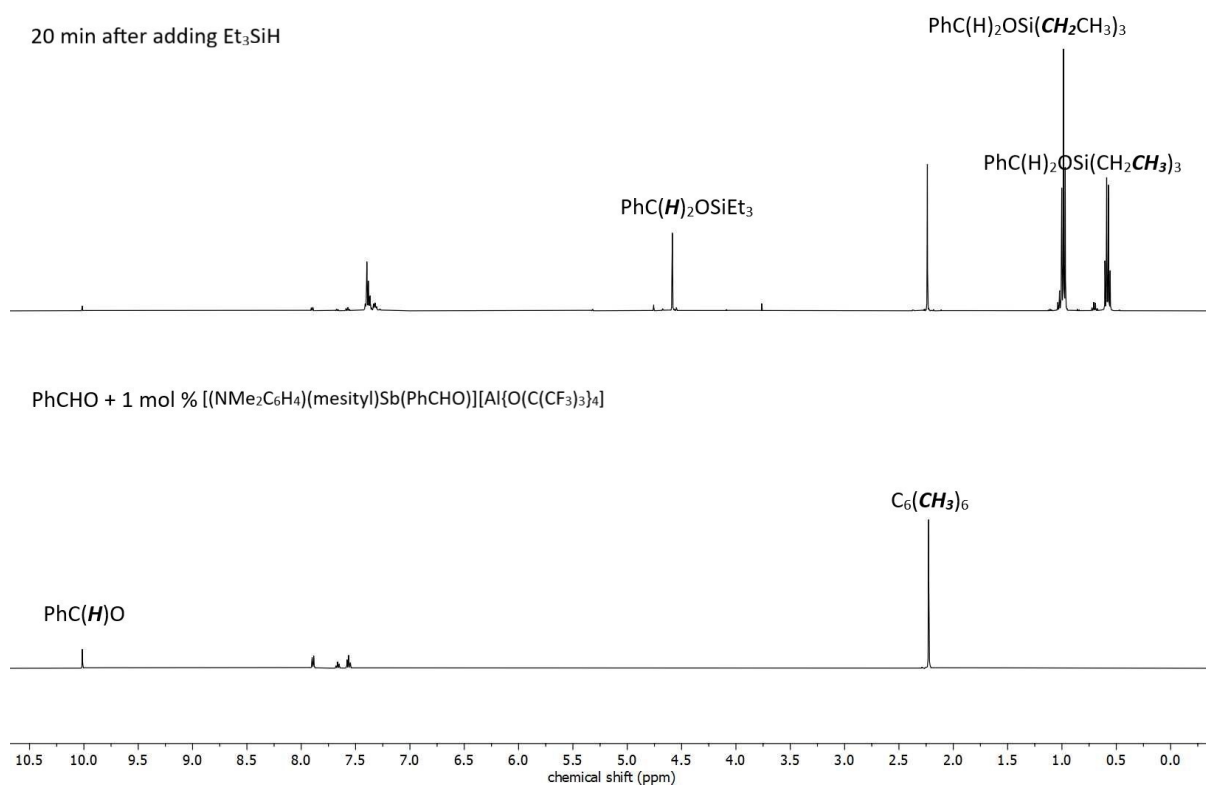

**Figure S41:** Stacked <sup>1</sup>H NMR spectra for hydrosilylation of PhCHO using 1 mol % [(NMe<sub>2</sub>C<sub>6</sub>H<sub>4</sub>)(mesityl)Sb(PhCHO)][Al{O(CF<sub>3</sub>)<sub>3</sub>}<sub>4</sub>] recorded in CD<sub>2</sub>Cl<sub>2</sub>. Complete consumption of Et<sub>3</sub>SiH resulted in >98% conversion to PhC(H)<sub>2</sub>OSiEt<sub>3</sub>. Hexamethylbenzene was used as internal reference.

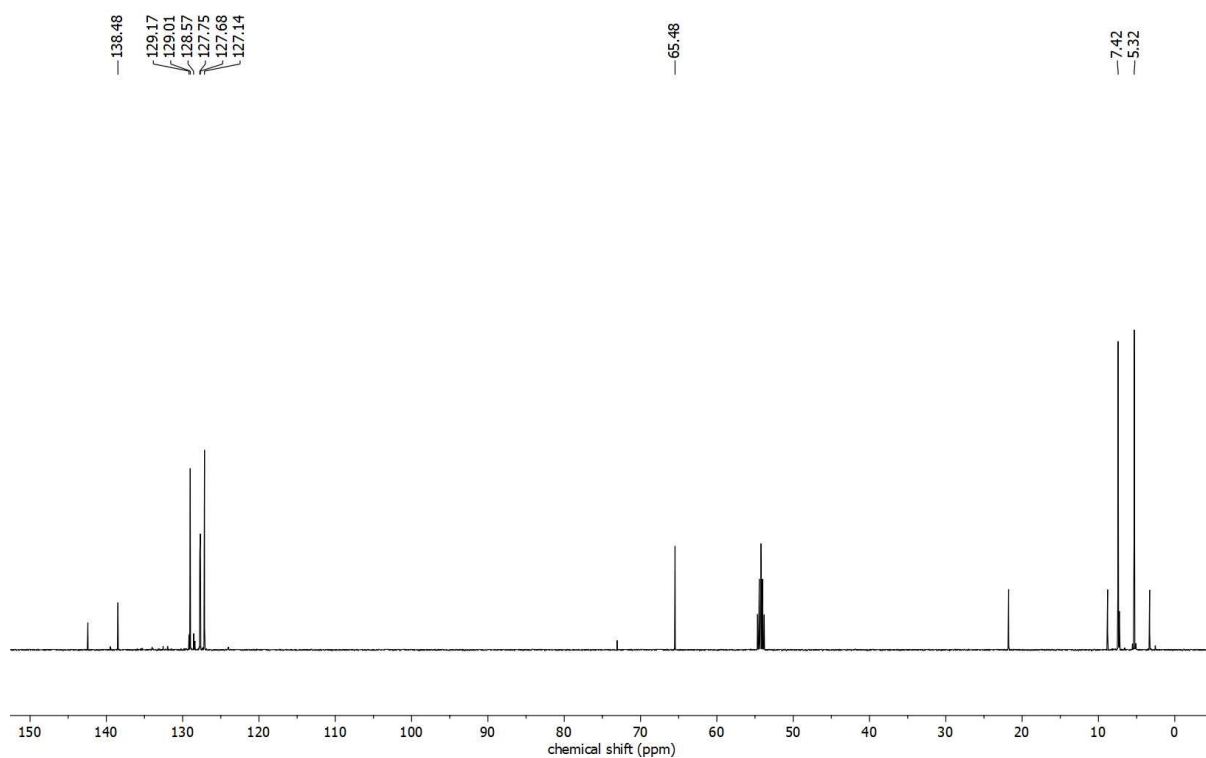

**Figure S42:** <sup>13</sup>C{<sup>1</sup>H} NMR spectrum for hydrosilylation of PhCHO using 1 mol % [(NMe<sub>2</sub>C<sub>6</sub>H<sub>4</sub>)(mesityl)Sb(PhCHO)][Al{O(CF<sub>3</sub>)<sub>3</sub>}<sub>4</sub>] recorded in CD<sub>2</sub>Cl<sub>2</sub>.

## Catalytic Deoxygenation of Benzophenone

### Experimental procedure

1 mol % of **4A** or **4B** and Ph<sub>2</sub>CO were loaded into J Young NMR tube. 0.5 mL CD<sub>2</sub>Cl<sub>2</sub> was condensed over the reaction mixture. 0.9 equivalent of Et<sub>3</sub>SiH with respect to Ph<sub>2</sub>CO was added to the reaction mixture inside glovebox. NMR tube was then sealed and reaction was monitored by <sup>1</sup>H NMR until the reaction reached completion.

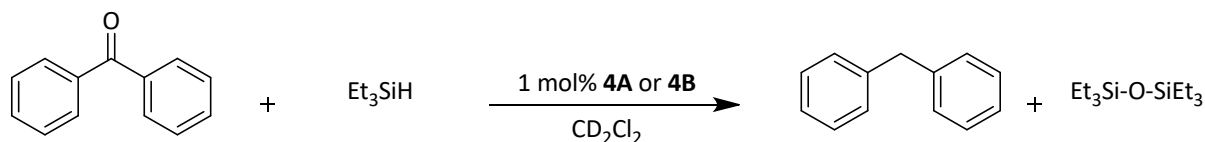

**Scheme S10**

### Using **4A**:

Ph<sub>2</sub>CO (0.012 g, 0.065 mmol), **4A** (0.001 g, 0.0006 mmol), Et<sub>3</sub>SiH (9.42 μL, 0.059 mmol)

<sup>1</sup>H NMR (CD<sub>2</sub>Cl<sub>2</sub>, 500 MHz): δ 4.01 (s, 2H, Ph<sub>2</sub>CH<sub>2</sub>), 7.23 (m, 6H, o,p-C<sub>6</sub>H<sub>5</sub>), 7.32 (m, 4H, m-C<sub>6</sub>H<sub>4</sub>)

<sup>13</sup>C{<sup>1</sup>H} NMR (CD<sub>2</sub>Cl<sub>2</sub>, 125 MHz): δ 42.0 (Ph<sub>2</sub>CH<sub>2</sub>), 126.1 (*p*-C<sub>6</sub>H<sub>5</sub>), 128.5 (*o*-C<sub>6</sub>H<sub>5</sub>), 128.9 (*m*-C<sub>6</sub>H<sub>5</sub>), 141.5 (*i*-C<sub>6</sub>H<sub>5</sub>)

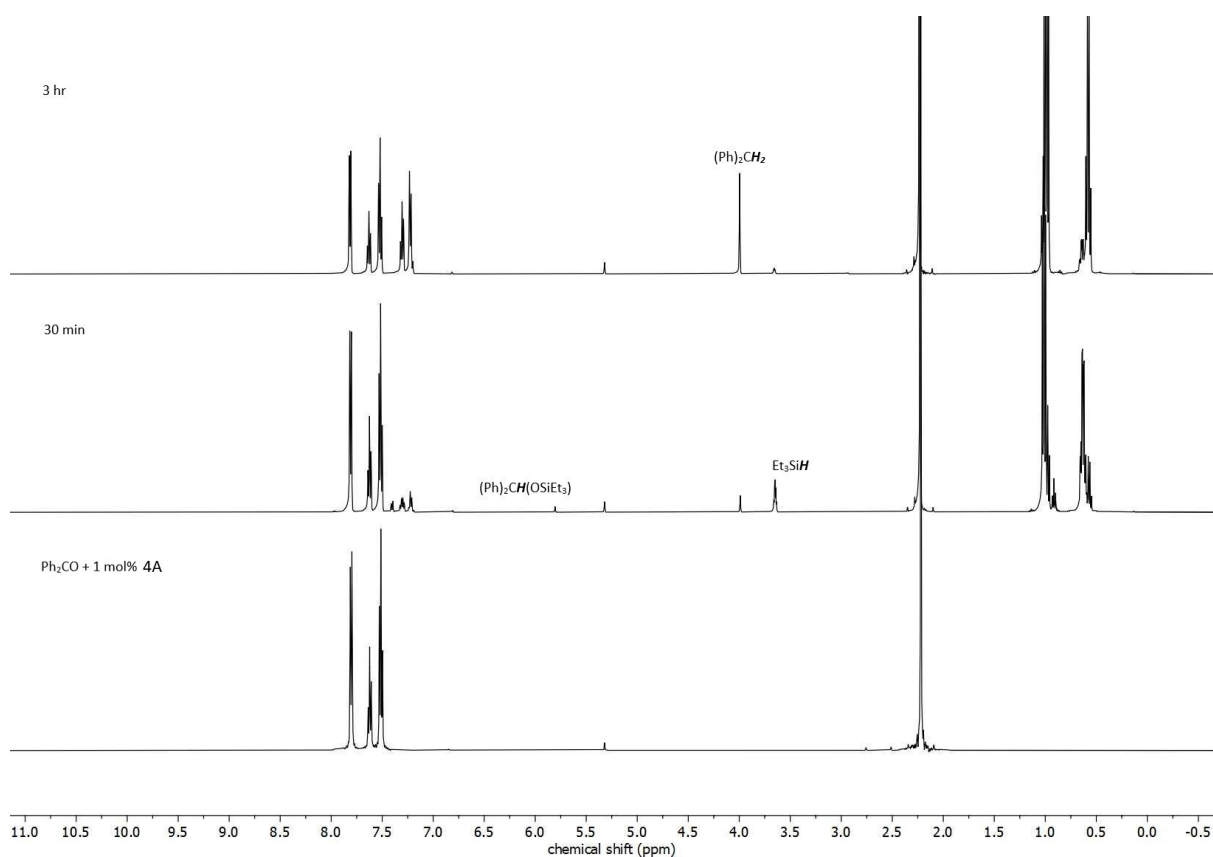

**Figure S43:** Stacked <sup>1</sup>H NMR spectra for deoxygenation of Ph<sub>2</sub>CO using 1 mol % **4A** recorded in CD<sub>2</sub>Cl<sub>2</sub>. Complete consumption of Et<sub>3</sub>SiH resulted in >99% conversion to (Ph)<sub>2</sub>CH<sub>2</sub> (yield w.r.t Et<sub>3</sub>SiH). Hexamethylbenzene was used as an internal standard.

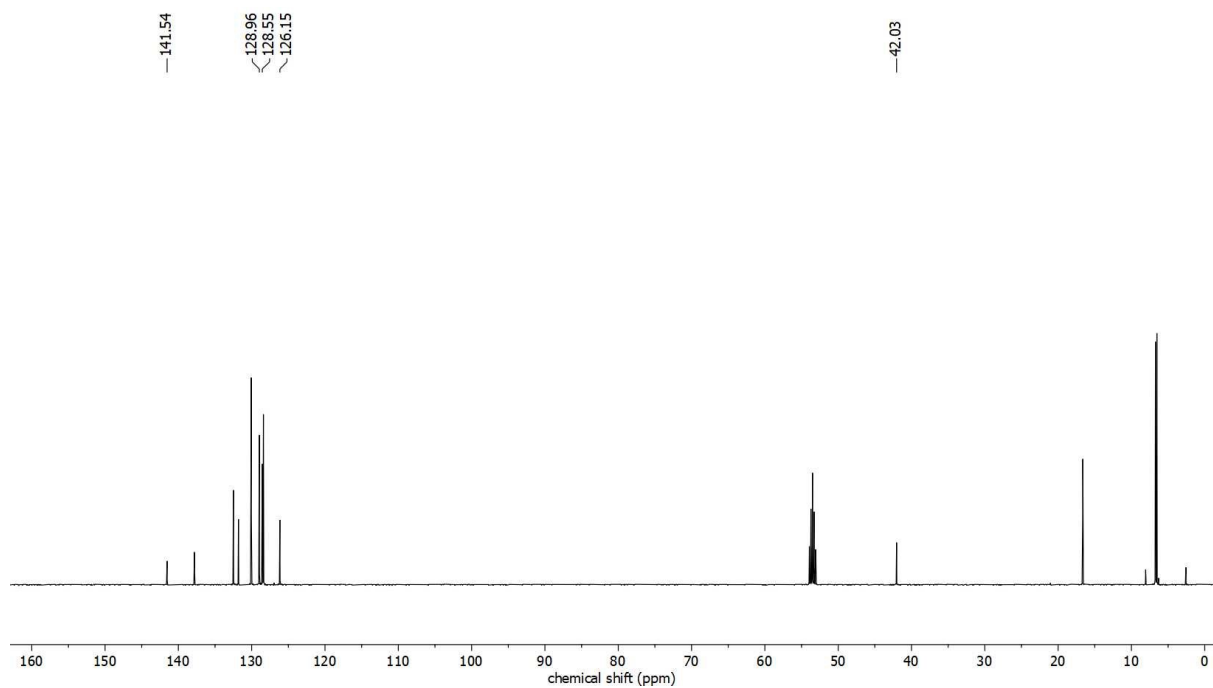

**Figure S44:** <sup>13</sup>C{<sup>1</sup>H} NMR spectrum for deoxygenation of Ph<sub>2</sub>CO using 1 mol % **4A** recorded in CD<sub>2</sub>Cl<sub>2</sub>. Complete consumption of Et<sub>3</sub>SiH resulted in >99% conversion to (Ph)<sub>2</sub>CH<sub>2</sub> (yield w.r.t Et<sub>3</sub>SiH).

**Using 4B:**

Ph<sub>2</sub>CO (0.012 g, 0.066 mmol), **4B** (0.001 g, 0.0006 mmol), Et<sub>3</sub>SiH (9.51 μL, 0.060 mmol)

<sup>1</sup>H NMR (CD<sub>2</sub>Cl<sub>2</sub>, 500 MHz): δ 4.02 (s, 2H, Ph<sub>2</sub>CH<sub>2</sub>), 7.22 (m, 6H, o,p-C<sub>6</sub>H<sub>5</sub>), 7.33 (m, 4H, m-C<sub>6</sub>H<sub>4</sub>)

<sup>13</sup>C{<sup>1</sup>H} NMR (CD<sub>2</sub>Cl<sub>2</sub>, 125 MHz): δ 41.9 (Ph<sub>2</sub>CH<sub>2</sub>), 126.0 (*p*-C<sub>6</sub>H<sub>5</sub>), 128.4 (*o*-C<sub>6</sub>H<sub>5</sub>), 128.8 (*m*-C<sub>6</sub>H<sub>5</sub>), 141.4 (*i*-C<sub>6</sub>H<sub>5</sub>)

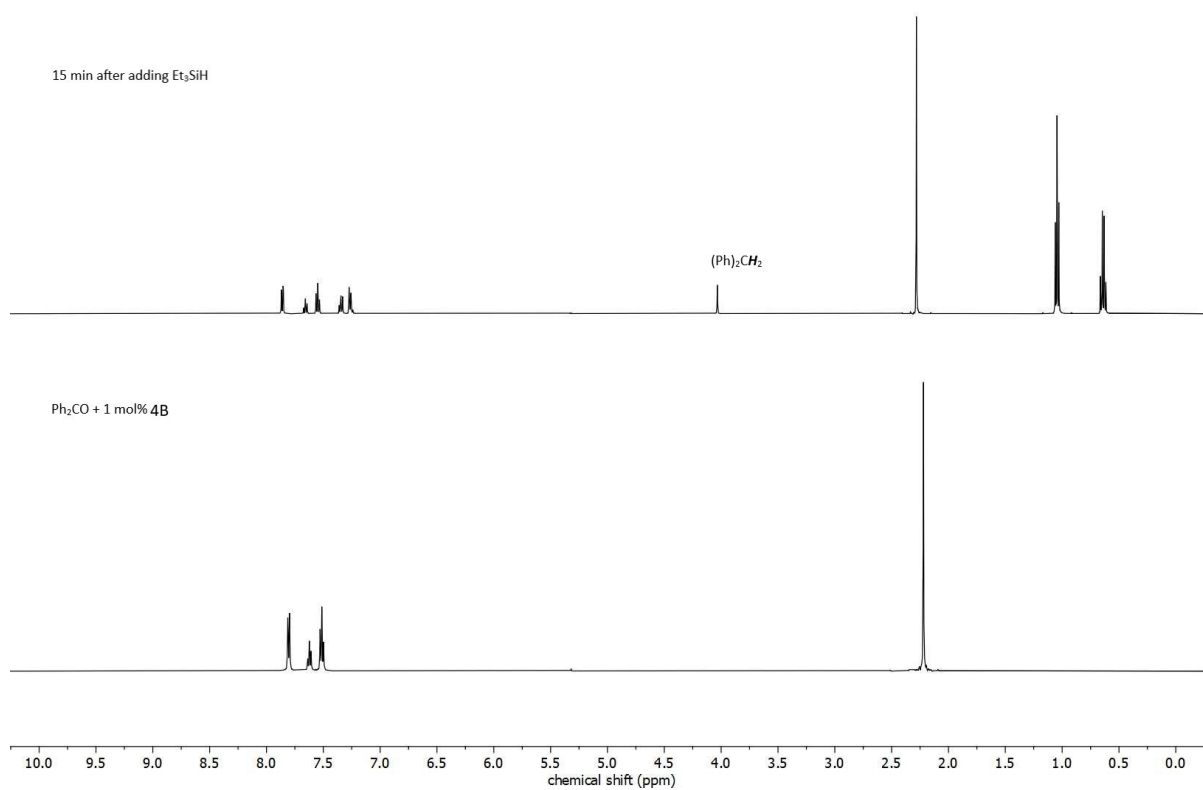

**Figure S45:** Stacked <sup>1</sup>H NMR spectra for deoxygenation of Ph<sub>2</sub>CO using 1 mol % **4B** recorded in CD<sub>2</sub>Cl<sub>2</sub>. Complete consumption of Et<sub>3</sub>SiH resulted in >99% conversion to (Ph)<sub>2</sub>CH<sub>2</sub> (yield w.r.t Et<sub>3</sub>SiH)

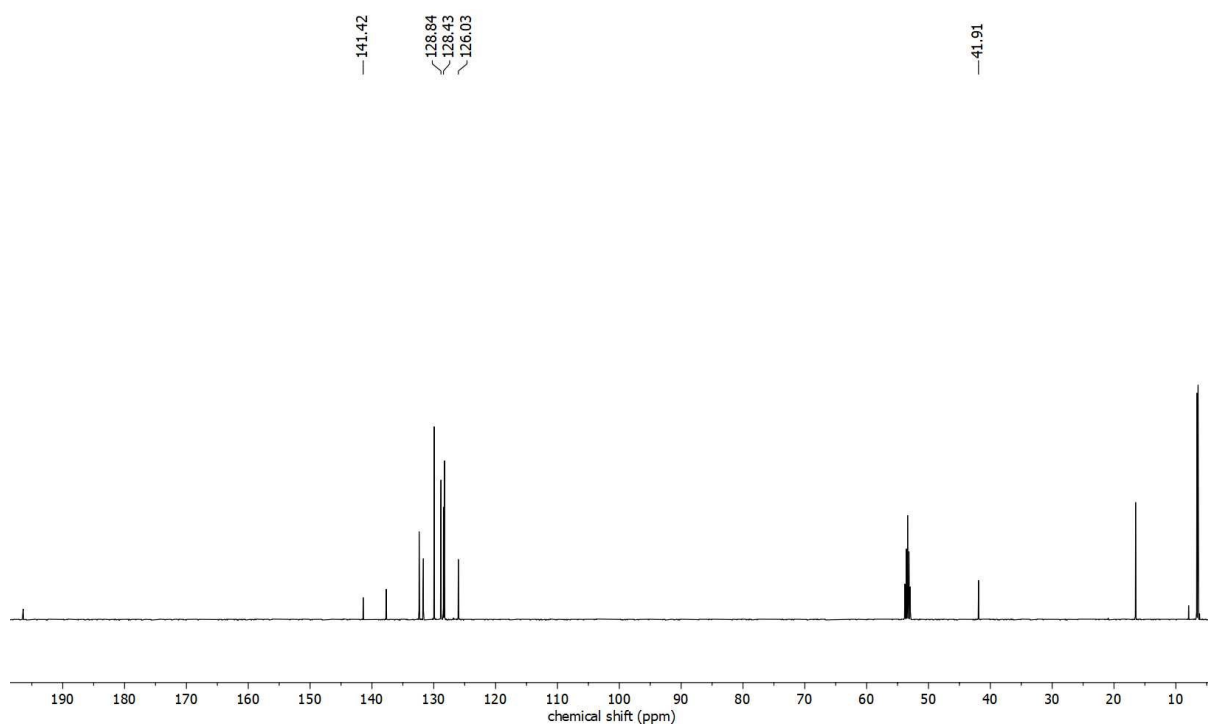

**Figure S46:**  $^{13}\text{C}\{^1\text{H}\}$  NMR spectrum for deoxygenation of  $\text{Ph}_2\text{CO}$  using 1 mol % 4A recorded in  $\text{CD}_2\text{Cl}_2$ . Complete consumption of  $\text{Et}_3\text{SiH}$  resulted in >99% conversion to  $(\text{Ph})_2\text{CH}_2$  (yield w.r.t  $\text{Et}_3\text{SiH}$ ).

## Carbonyl olefin Metatheses

### Ring Opening Carbonyl Olefin Metathesis (ROCOM)

#### Experimental procedure

10 mol %  $[\text{NMe}_2\text{C}_6\text{H}_4(\text{mesityl})\text{Sb}(\text{PhCHO})][\text{Al}(\text{OC}(\text{CF}_3)_3)_4]/[\text{NMe}_2\text{CH}_2\text{C}_6\text{H}_4(\text{mesityl})\text{Sb}(\text{PhCHO})][\text{Al}(\text{OC}(\text{CF}_3)_3)_4]$  was generated in situ with **1A/1B**,  $[\text{Ag}(\text{CH}_2\text{Cl}_2)_2][\text{Al}(\text{OC}(\text{CF}_3)_3)_4]$  and PhCHO in  $\text{C}_6\text{D}_5\text{-Br}$  (0.6 mL) in a J Young NMR tube. The solution was filtered to another J Young NMR tube to give a pale-yellow solution. To this, 1-methylcyclopentene was added to the solution giving instant light pink color to the solution. NMR tube was then sealed and reaction was monitored for 24 h at room temperature. Thereafter, the reaction was quenched by passing through a silica plug and eluted using dichloromethane. The volatiles were removed under reduced pressure and the metathesis product was isolated from the crude mixture by flash column (9:1 hexanes/EtOAc) to give **g** as yellow oil.

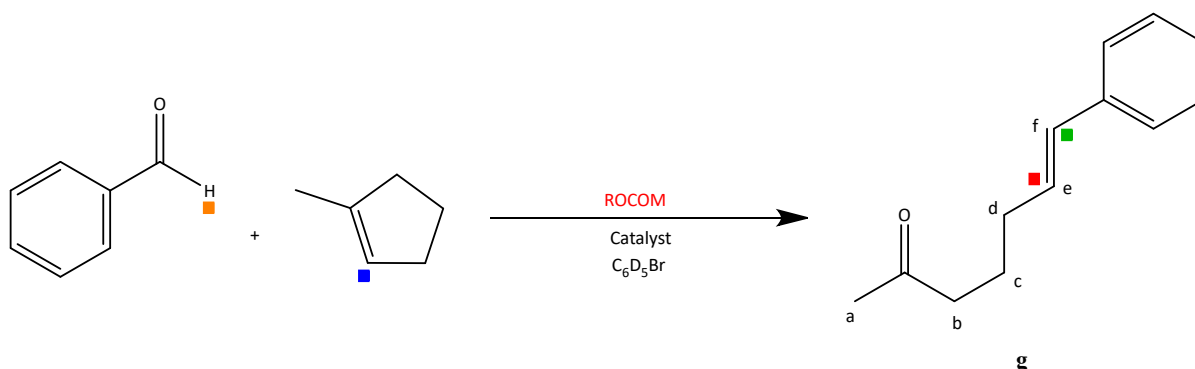

Scheme S11

Using 10 mol % of  $[\text{NMe}_2\text{CH}_2\text{C}_6\text{H}_4(\text{mesityl})\text{Sb}(\text{PhCHO})][\text{Al}(\text{OC}(\text{CF}_3)_3)_4]$

**1A** (0.003 g, 0.007 mmol),  $[\text{Ag}(\text{CH}_2\text{Cl}_2)_2][\text{Al}(\text{OC}(\text{CF}_3)_3)_4]$  (0.009 g, 0.007 mmol), PhCHO (7.71  $\mu\text{l}$ , 0.0756 mmol), 1-methylcyclopentene (7.96  $\mu\text{l}$ , 0.0756 mmol)



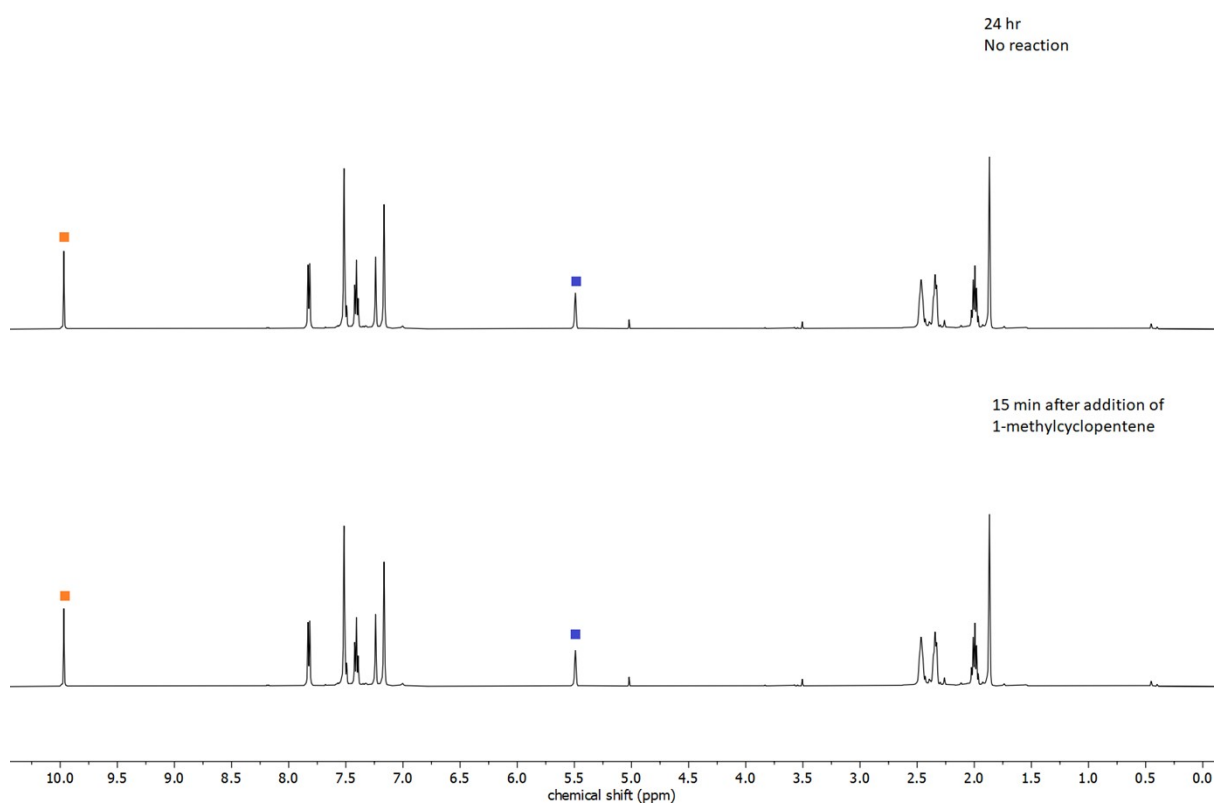

**Figure S47:** Stacked  $^1\text{H}$  NMR spectra of ROCOM using 10 mol %  $[\text{NMe}_2\text{CH}_2\text{C}_6\text{H}_4(\text{mesityl})\text{Sb}(\text{PhCHO})][\text{Al}(\text{OC}(\text{CF}_3)_3)_4]$ : Neat vs reaction after 24 h recorded in  $\text{C}_6\text{D}_5\text{-Br}$ .

Using 10 mol % of  $[\text{NMe}_2\text{C}_6\text{H}_4(\text{mesityl})\text{Sb}(\text{PhCHO})][\text{Al}(\text{OC}(\text{CF}_3)_3)_4]$

**1B** (0.003 g, 0.007 mmol),  $[\text{Ag}(\text{CH}_2\text{Cl}_2)_2][\text{Al}(\text{OC}(\text{CF}_3)_3)_4]$  (0.009 g, 0.007 mmol), PhCHO (7.71  $\mu\text{l}$ , 0.0756 mmol), 1-methylcyclopentene (7.96  $\mu\text{l}$ , 0.0756 mmol)

Yield of **g** = 0.005 g (35%).

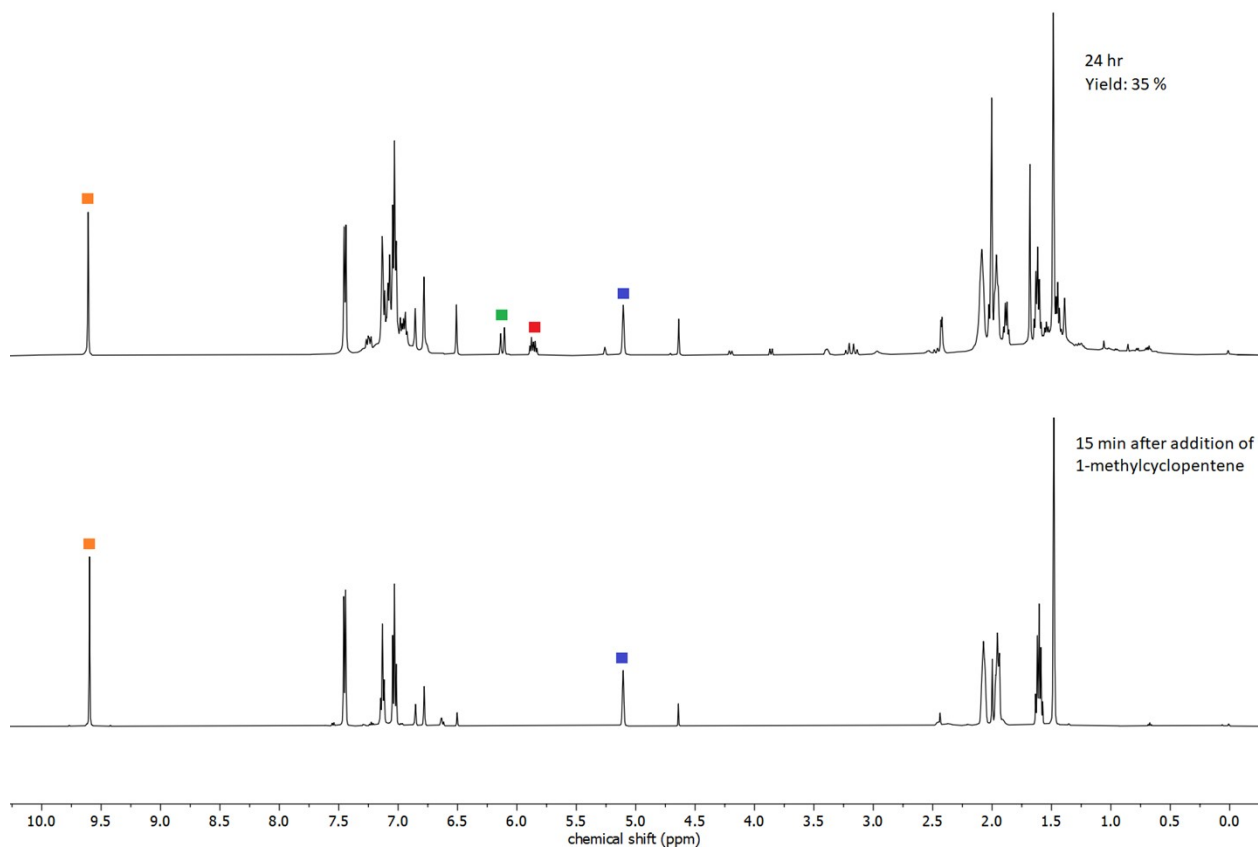

**Figure S48:** Stacked  $^1\text{H}$  NMR spectra of ROCOM using 10 mol %  $[\text{NMe}_2\text{C}_6\text{H}_4(\text{mesityl})\text{Sb}(\text{PhCHO})][\text{Al}(\text{OC}(\text{CF}_3)_3)_4]$ : Neat vs reaction after 24 h recorded in  $\text{C}_6\text{D}_5\text{-Br}$ .

**Isolated metathesis product **g****

$^1\text{H}$  NMR ( $\text{CD}_2\text{Cl}_2$ , 500 MHz):  $\delta$  1.71-1.77 (m, 2H, c- $\text{CH}_2$ ), 2.10 (s, 3H, a- $\text{CH}_3$ ), 2.20-2.25 (m, 2H, d- $\text{CH}_2$ ), 2.47 (t, 2H, b- $\text{CH}_2$ ), 6.18-6.24 (dt, 1H, e-CH), 6.40 (d, 1H, f-CH), 7.20 (t, 1H, *p*- $\text{C}_6\text{H}_5$ ), 7.29 (t, 2H, *m*- $\text{C}_6\text{H}_5$ ), 7.35 (d, 2H, *o*- $\text{C}_6\text{H}_5$ )

$^{13}\text{C}\{^1\text{H}\}$  NMR ( $\text{CD}_2\text{Cl}_2$ , 125 MHz):  $\delta$  23.7 (c- $\text{CH}_2$ ), 30.1 (a- $\text{CH}_3$ ), 32.7 (d- $\text{CH}_2$ ), 43.1 (b- $\text{CH}_2$ ), 126.3 (*p*- $\text{C}_6\text{H}_4$ ), 127.3 (*m*- $\text{C}_6\text{H}_4$ ), 128.9 (*o*- $\text{C}_6\text{H}_4$ ), 130.5 (*i*- $\text{C}_6\text{H}_4$ ), 130.8 (e-CH), 138.1 (f-CH), 208.7 (CO)

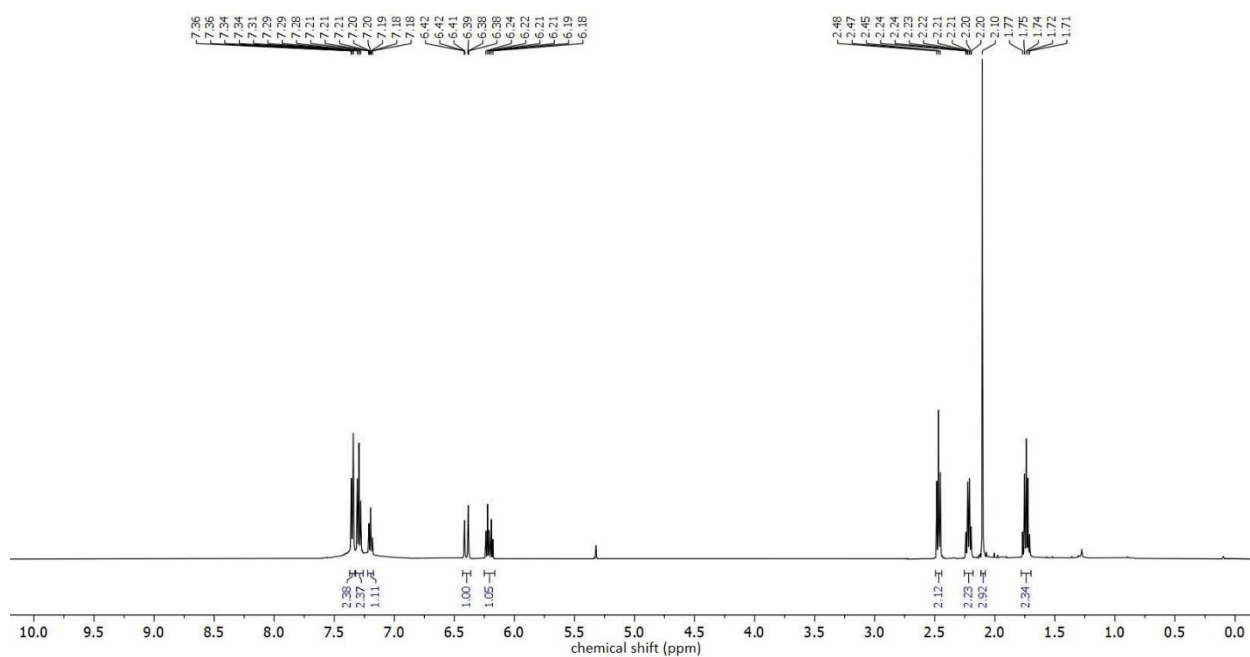

Figure S49:  $^1\text{H}$  NMR spectrum of **g** recorded in  $\text{CD}_2\text{Cl}_2$ .

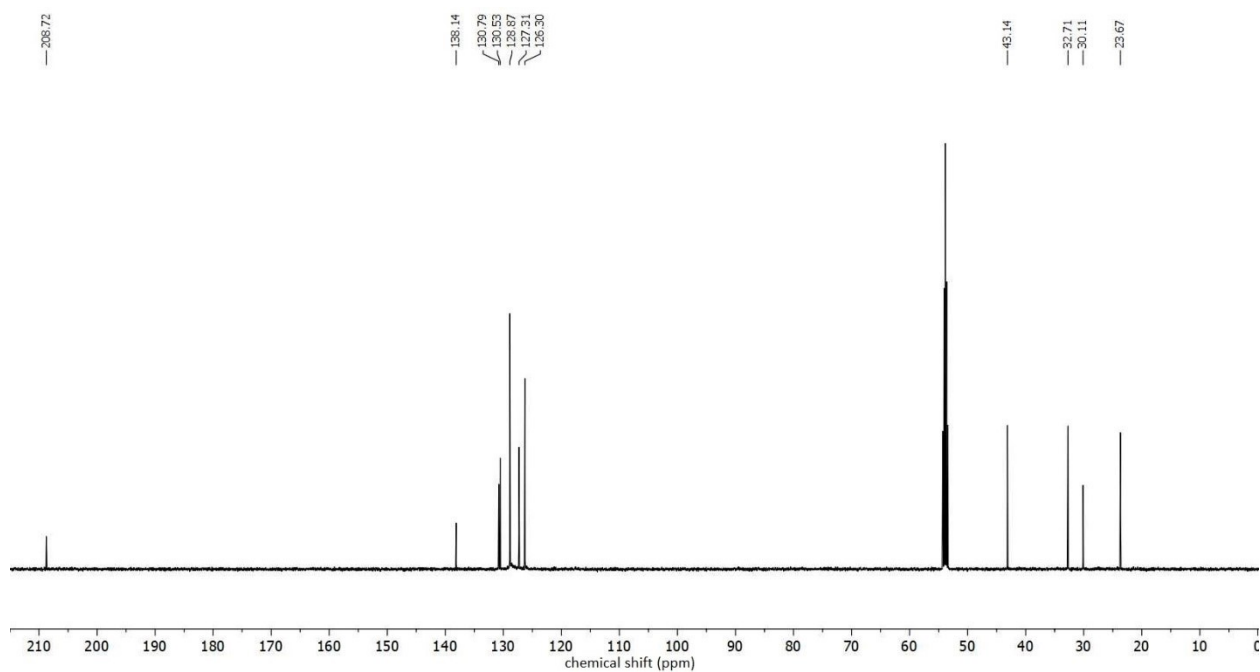

Figure S50:  $^{13}\text{C}\{^1\text{H}\}$  NMR spectrum of **g** recorded in  $\text{CD}_2\text{Cl}_2$ .

Using 5 mol % of  $[\text{NMe}_2\text{C}_6\text{H}_4(\text{mesityl})\text{Sb}(\text{PhCHO})][\text{Al}(\text{OC}(\text{CF}_3)_3)_4]$

**1B** (0.002 g, 0.005 mmol),  $[\text{Ag}(\text{CH}_2\text{Cl}_2)_2][\text{Al}[\text{O}\{\text{C}(\text{CF}_3)_3\}_4]$  (0.006 g, 0.00), PhCHO (14.7  $\mu\text{L}$ , 0.1 mmol), 1-methylcyclopentene (10.63  $\mu\text{L}$ , 0.1 mmol)

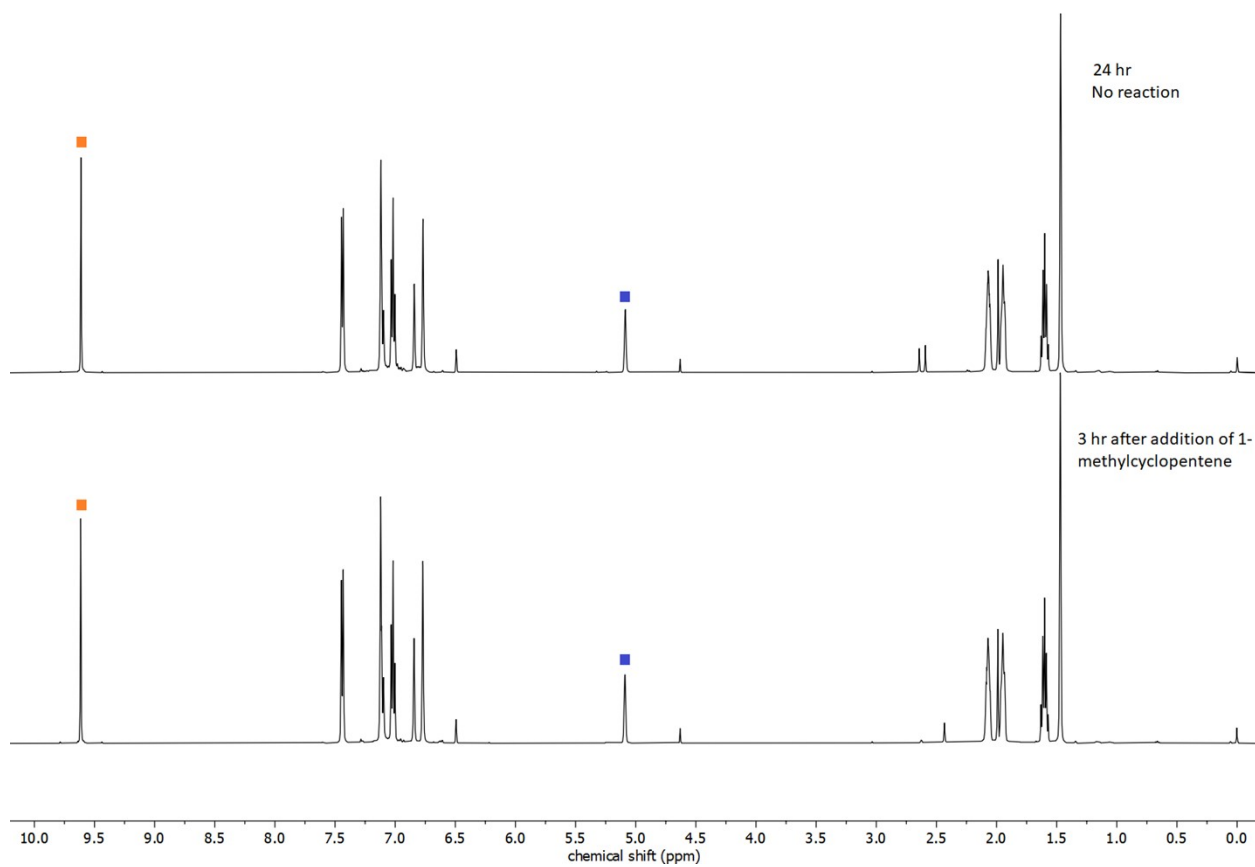

**Figure S51:** Stacked  $^1\text{H}$  NMR spectra of ROCOM using 5 mol %  $[\text{NMe}_2\text{C}_6\text{H}_4(\text{mesityl})\text{Sb}(\text{PhCHO})][\text{Al}(\text{OC}(\text{CF}_3)_3)_4]$  : Neat vs reaction after 24 h recorded in  $\text{C}_6\text{D}_5\text{-Br}$ .

Using 20 mol %  $[\text{NMe}_2\text{C}_6\text{H}_4(\text{mesityl})\text{Sb}(\text{PhCHO})][\text{Al}(\text{OC}(\text{CF}_3)_3)_4]$

**1B** (0.002 g, 0.005 mmol),  $[\text{Ag}(\text{CH}_2\text{Cl}_2)_2][\text{Al}[\text{O}\{\text{C}(\text{CF}_3)_3\}_4]$  (0.006 g, 0.005), PhCHO (2.71  $\mu\text{L}$ , 0.0252 mmol), 1-methylcyclopentene (2.65  $\mu\text{L}$ , 0.0252 mmol)

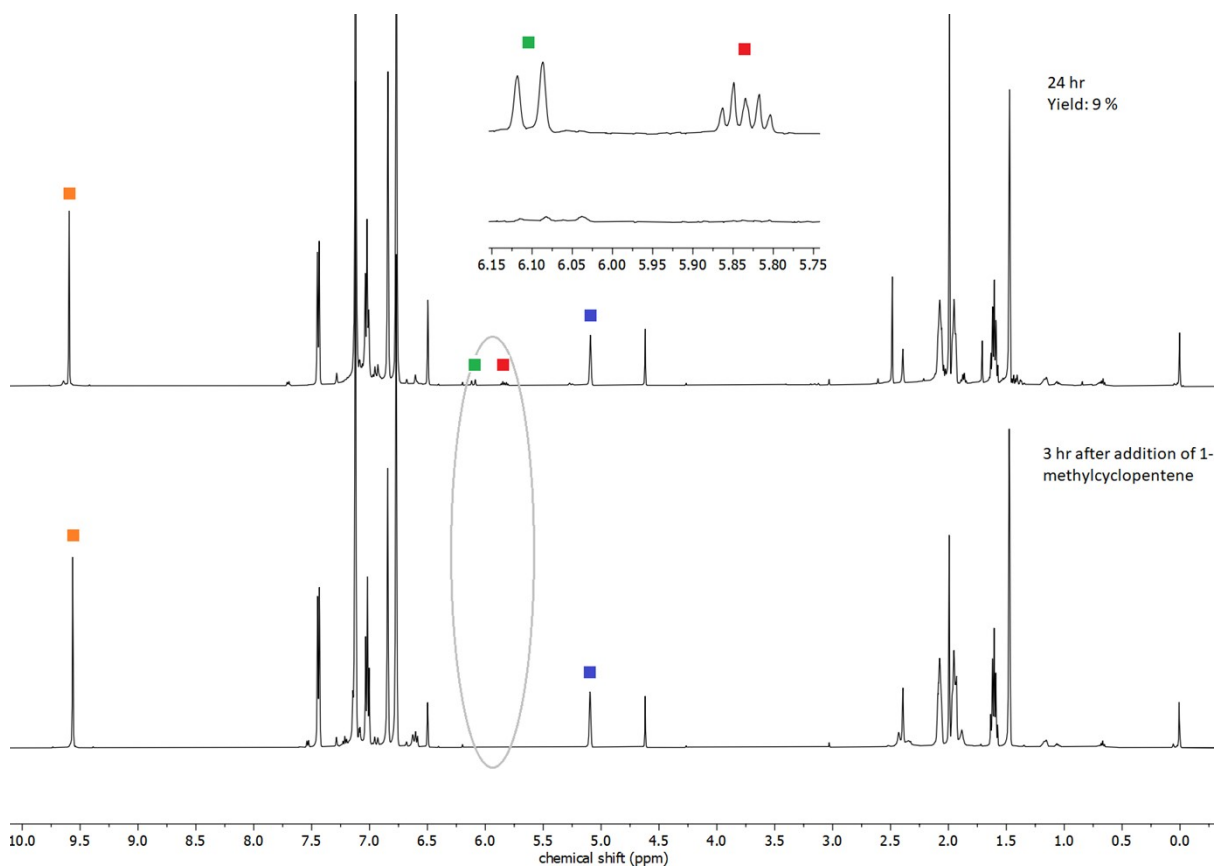

**Figure S52:** Stacked  $^1\text{H}$  NMR spectra of ROCOM using 20 mol %  $[\text{NMe}_2\text{C}_6\text{H}_4(\text{mesityl})\text{Sb}(\text{PhCHO})][\text{Al}(\text{OC}(\text{CF}_3)_3)_4]$ : Neat vs reaction after 24 h recorded in  $\text{C}_6\text{D}_5\text{-Br}$ .

Using 10 mol % SbCl<sub>3</sub>:

SbCl<sub>3</sub> (0.002 g, 0.008 mmol), PhCHO (8.94 μL, 0.087 mmol) and 1-methylcyclopentene (9.25 μL, 0.087 mmol)

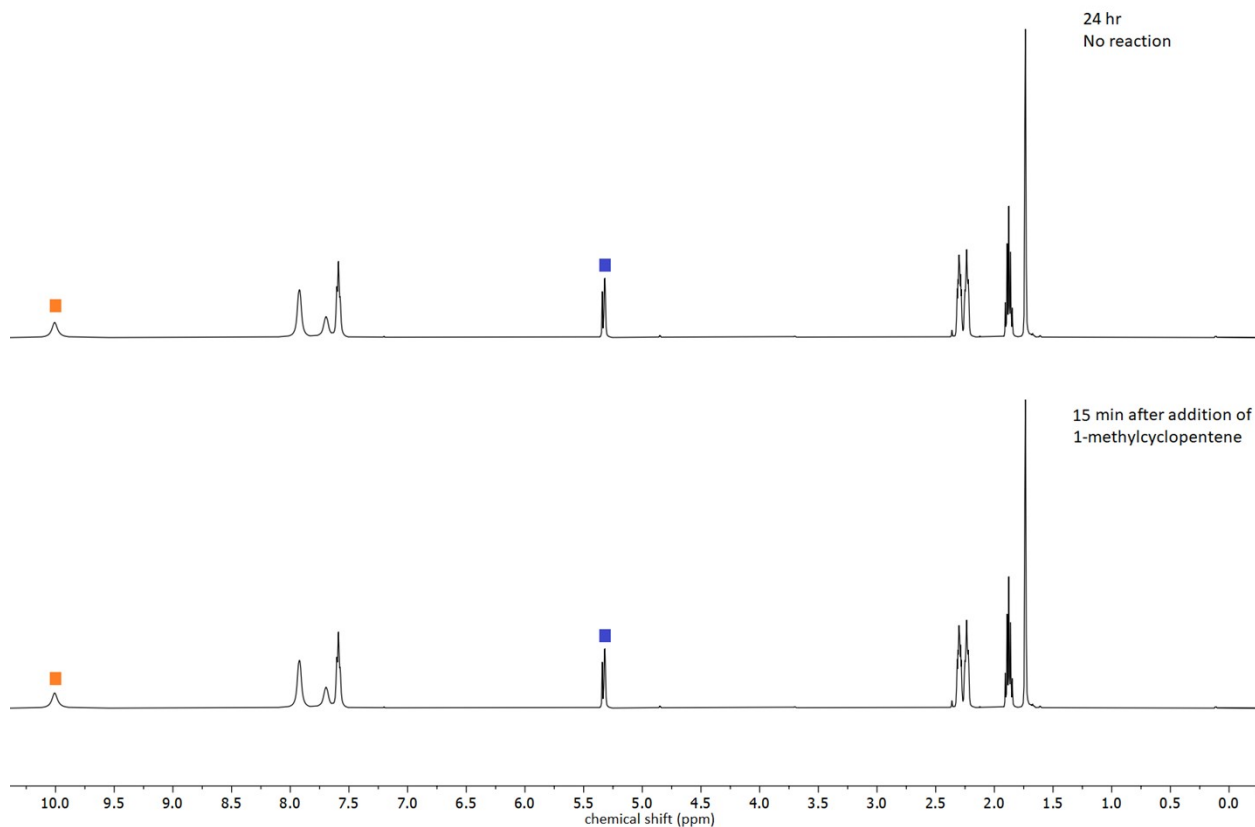

**Figure S53:** Stacked <sup>1</sup>H NMR spectra of ROCOM using 10 mol % SbCl<sub>3</sub>: Neat vs reaction after 24 h recorded in CD<sub>2</sub>Cl<sub>2</sub>.

Using 10 mol % B(C<sub>6</sub>F<sub>5</sub>)<sub>3</sub>:

B(C<sub>6</sub>F<sub>5</sub>)<sub>3</sub> (0.002 g, 0.0039 mmol), PhCHO (3.94 μL, 0.039 mmol), 1-methylcyclopentene (4.1 μL, 0.039 mmol)

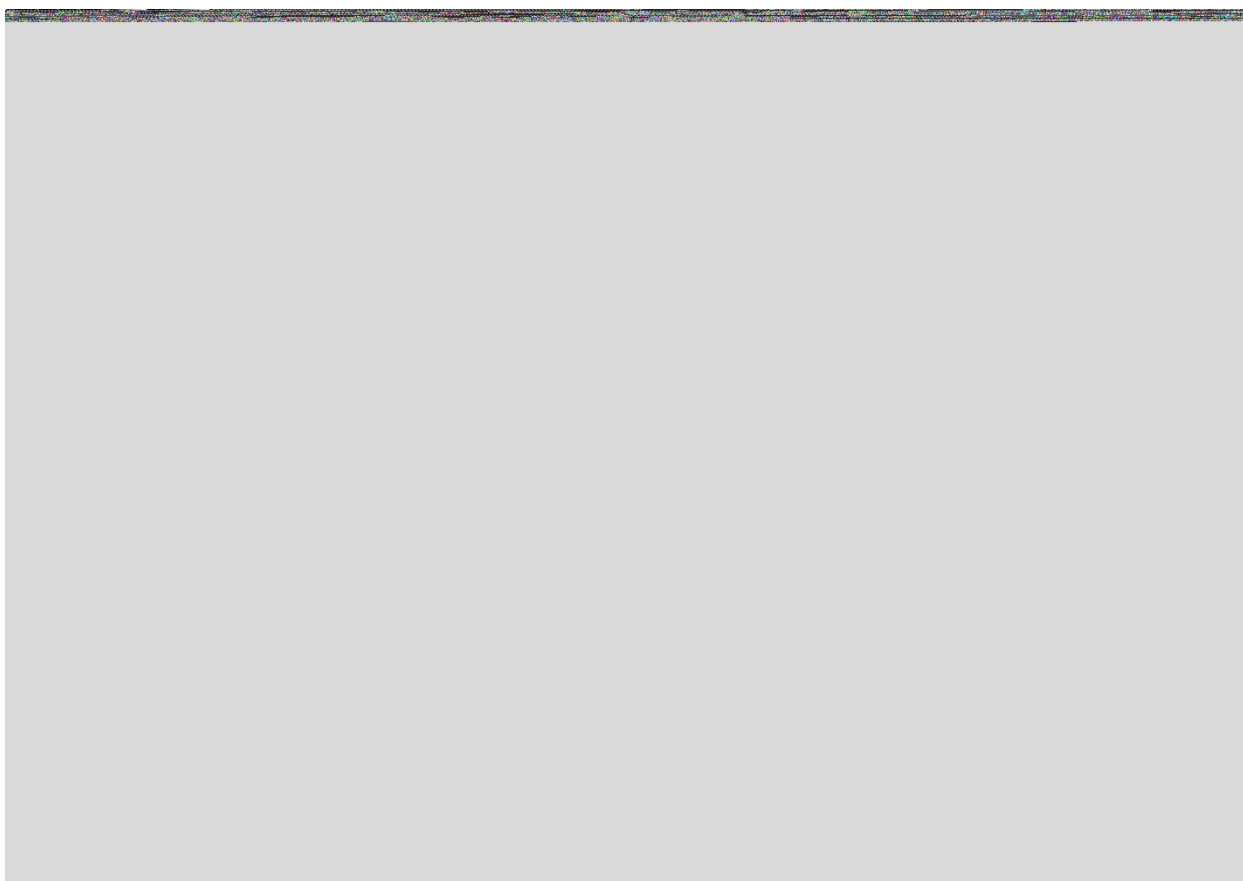

**Figure S54:** Stacked  $^1\text{H}$  NMR spectra of ROCOM using 10 mol %  $\text{B}(\text{C}_6\text{F}_5)_3$ : Neat vs reaction after 24 h recorded in  $\text{CD}_2\text{Cl}_2$ .

Using 10 mol %  $[\text{Ag}(\text{CH}_2\text{Cl}_2)_2][\text{Al}[\text{O}\{\text{C}(\text{CF}_3)_3\}_4]$

$[\text{Ag}(\text{CH}_2\text{Cl}_2)_2][\text{Al}[\text{O}\{\text{C}(\text{CF}_3)_3\}_4]$  (0.002 g, 0.0039 mmol), PhCHO (3.94  $\mu\text{L}$ , 0.039 mmol), 1-methylcyclopentene (4.1  $\mu\text{L}$ , 0.039 mmol)

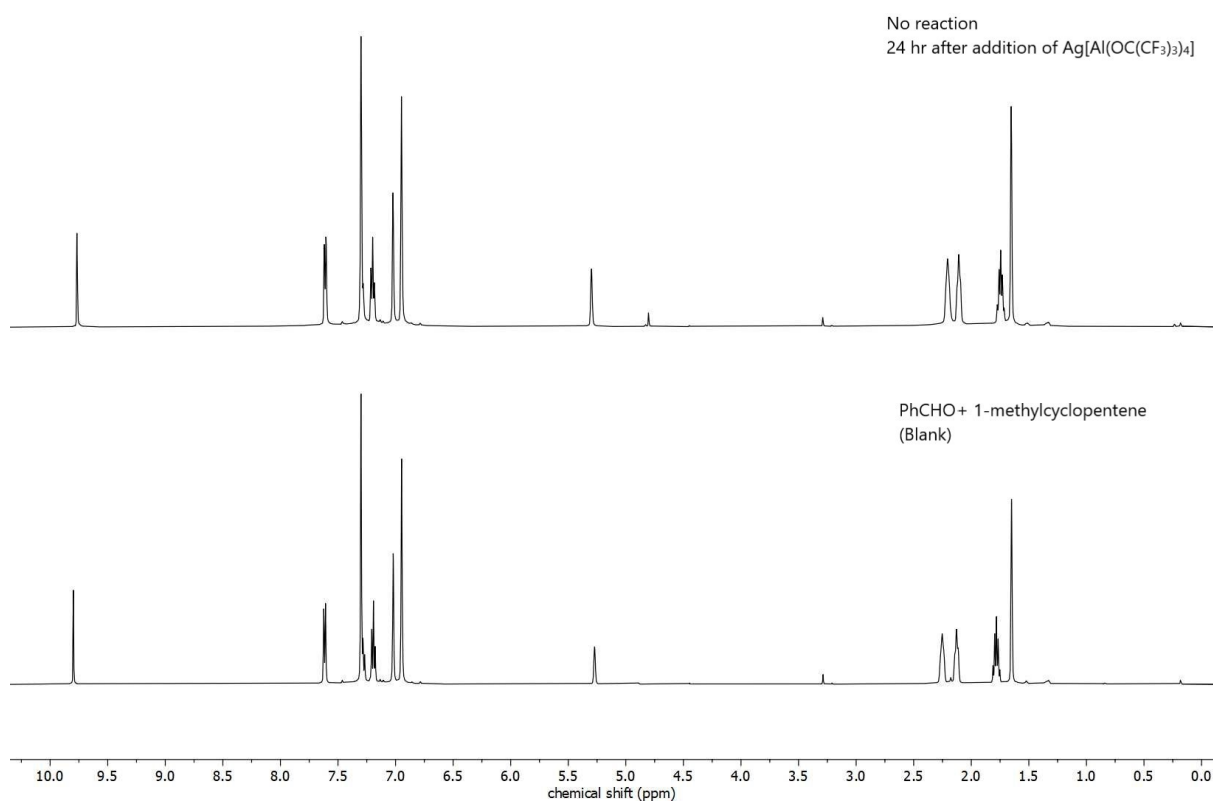

**Figure S55:** Stacked  $^1\text{H}$  NMR spectra of ROCOM using 10 mol %  $[\text{Ag}(\text{CH}_2\text{Cl}_2)_2][\text{Al}[\text{O}\{\text{C}(\text{CF}_3)_3\}_4]$ : Neat vs reaction after 24 h recorded in  $\text{CD}_2\text{Cl}_2$ .

**Table S2**

| Catalyst (mol%)                                                                                                                     | Product     | Time (h) | Yield (%) |
|-------------------------------------------------------------------------------------------------------------------------------------|-------------|----------|-----------|
| $[\text{NMe}_2\text{CH}_2\text{C}_6\text{H}_4(\text{mesityl})\text{Sb}(\text{PhCHO})][\text{Al}(\text{OC}(\text{CF}_3)_3)_4]$ (10%) | No reaction | 24       | -         |
| $[\text{NMe}_2\text{C}_6\text{H}_4(\text{mesityl})\text{Sb}(\text{PhCHO})][\text{Al}(\text{OC}(\text{CF}_3)_3)_4]$ (5%)             | No reaction | 24       | -         |
| $[\text{NMe}_2\text{C}_6\text{H}_4(\text{mesityl})\text{Sb}(\text{PhCHO})][\text{Al}(\text{OC}(\text{CF}_3)_3)_4]$ (10%)            | <b>g</b>    | 24       | 35        |
| $[\text{NMe}_2\text{C}_6\text{H}_4(\text{mesityl})\text{Sb}(\text{PhCHO})][\text{Al}(\text{OC}(\text{CF}_3)_3)_4]$ (20%)            | <b>g</b>    | 24       | 9         |
| $\text{SbCl}_3$ (10%)                                                                                                               | No reaction | 24       | -         |
| $\text{B}(\text{C}_6\text{F}_5)_3$ (10%)                                                                                            | No reaction | 24       | -         |
| $[\text{Ag}(\text{CH}_2\text{Cl}_2)_2][\text{Al}[\text{O}\{\text{C}(\text{CF}_3)_3\}_4]$ (10%)                                      | No reaction | 24       | -         |

#### Hydrosilylation of metathesis product **g** using $\text{Et}_3\text{SiH}$

**1B** (0.002 g, 0.005 mmol), **g** (0.019 g, 0.1 mmol) and  $[\text{Ag}(\text{CH}_2\text{Cl}_2)_2][\text{Al}[\text{O}\{\text{C}(\text{CF}_3)_3\}_4]$  (0.006 g, 0.005 mmol) were loaded into a J Young NMR tube with 0.6 mL  $\text{CD}_2\text{Cl}_2$ . The reaction mixture was filtered into another J Young NMR tube.  $\text{Et}_3\text{SiH}$  (14.49  $\mu\text{L}$ , 0.09 mmol) was added to the



solution. NMR tube was then sealed and reaction was monitored by  $^1\text{H}$  NMR until the reaction reached completion.

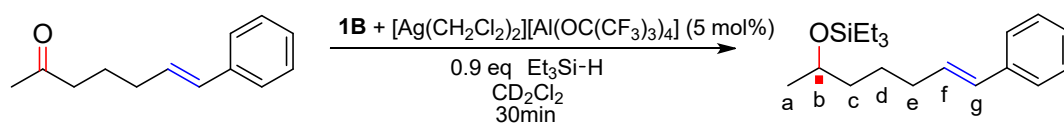

**Scheme S12**

$^1\text{H}$  NMR ( $\text{CD}_2\text{Cl}_2$ , 500 MHz):  $\delta$  0.58-0.69 (m, 9H,  $\text{OSiCH}_2\text{CH}_3$ ), 0.96-1.04 (q, 6H,  $\text{OSiCH}_2\text{CH}_3$ ), 1.15 (d, 3H, a- $\text{CH}_3$ ), 1.41-1.59 (m, 4H, c, d- $\text{CH}_2$ ), 1.72-1.74 (q, 2H, e- $\text{CH}_2$ ), 3.82-3.84 (q, 1H, b-CH), 6.21-6.24 (m, 1H, f-CH), 6.38, 6.40 (d, 1H, g-CH), 7.18, 7.20 (d, 2H, *o*- $\text{C}_6\text{H}_5$ ), 7.23-7.38 (m, 3H, *m*, *p*- $\text{C}_6\text{H}_5$ )

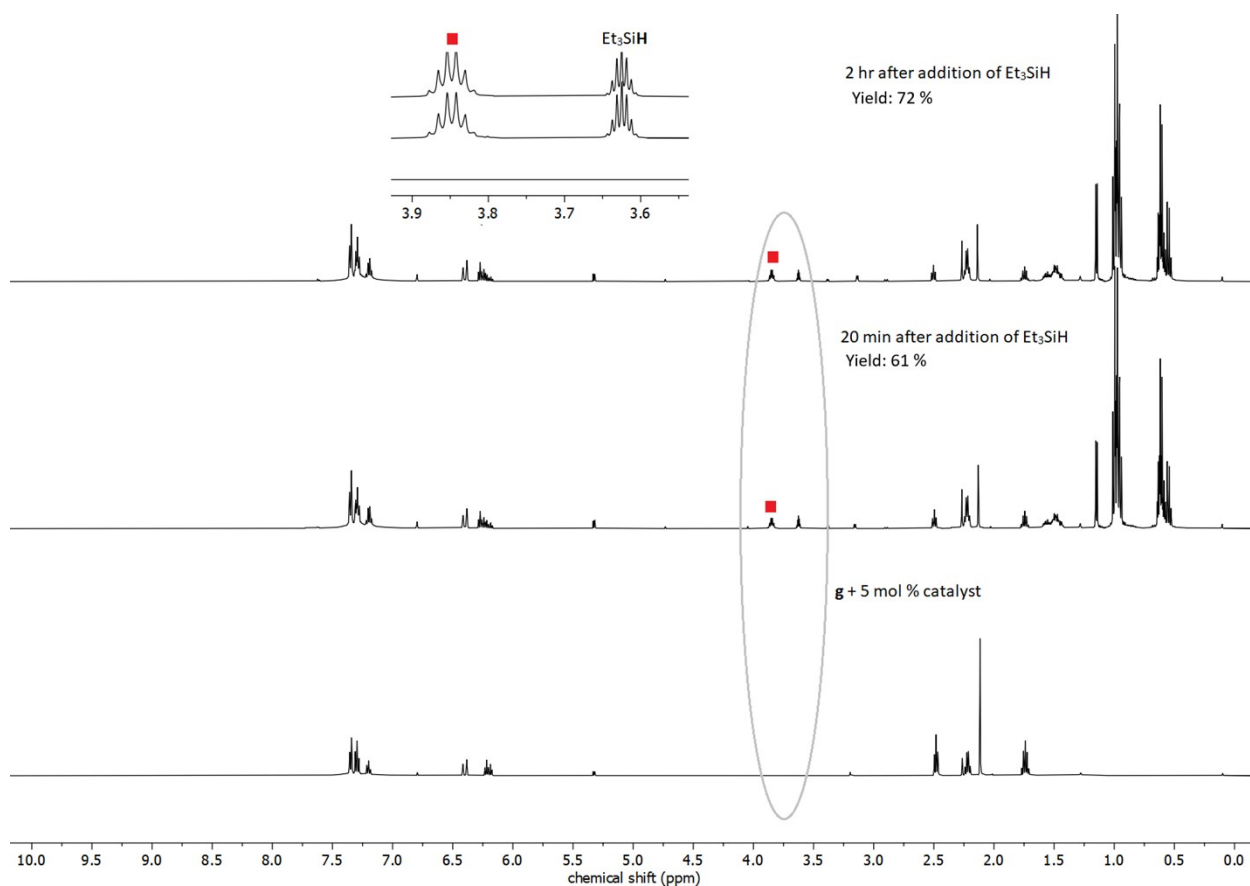

**Figure S56:** Stacked  $^1\text{H}$  NMR spectra of hydro-silylation of **g** using 5 mol % **4B**: Neat (**g** + 5 mol% catalyst) vs reaction 2 h after adding  $\text{Et}_3\text{SiH}$  recorded in  $\text{CD}_2\text{Cl}_2$ .

## Ring Closing Carbonyl Olefin Metathesis (RCCOM)

### Experimental Procedure:

Substrate **d** was synthesized according to literature procedure.<sup>[8]</sup> **1A/1B** and **d** were loaded in 0.6 mL C<sub>6</sub>D<sub>5</sub>-Br in a J Young NMR tube. [Ag(CH<sub>2</sub>Cl<sub>2</sub>)<sub>2</sub>][Al(OC(CF<sub>3</sub>)<sub>3</sub>)<sub>4</sub>] was added to the reaction mixture. The precipitated AgCl was removed from the solution by filtration to another J Young NMR tube within five minutes. NMR tube was then sealed and the reaction was monitored by <sup>1</sup>H NMR until the reaction reached completion.

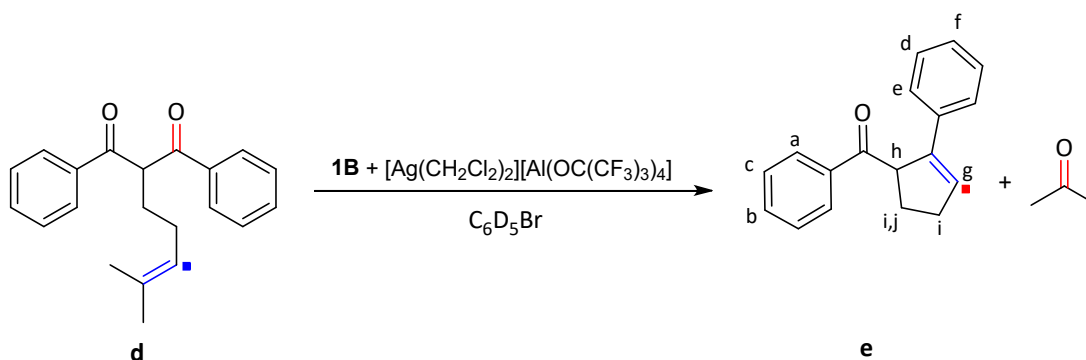

### Using **1A**

**1A** (0.004 g, 0.01 mmol), **d** (0.003 g, 0.01 mmol), [Ag(CH<sub>2</sub>Cl<sub>2</sub>)<sub>2</sub>][Al(OC(CF<sub>3</sub>)<sub>3</sub>)<sub>4</sub>] (0.012 g, 0.01 mmol)

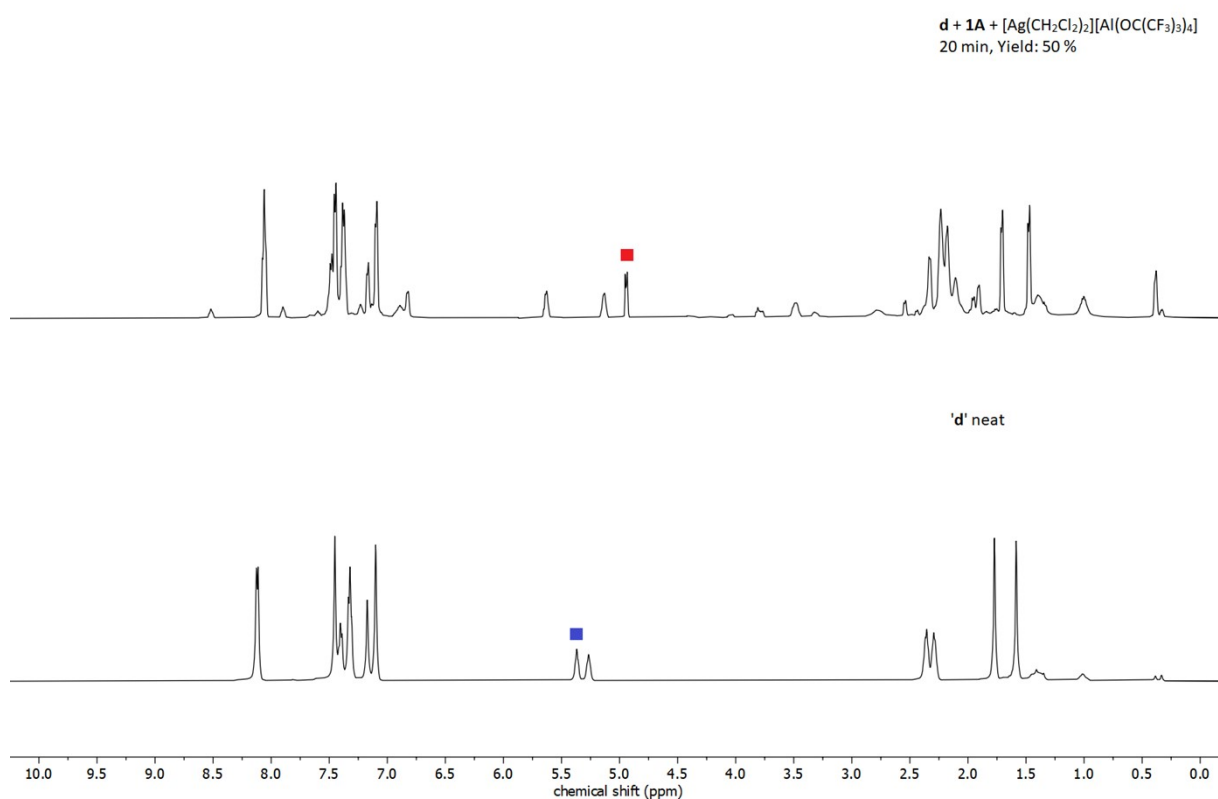

**Figure S57:** Stacked <sup>1</sup>H NMR spectra of RCCOM: Neat **d** vs reaction using **1A** after 20 min recorded in C<sub>6</sub>D<sub>5</sub>-Br.

### Using **1B**

**1B** (0.004 g, 0.01 mmol), **d** (0.003 g, 0.01 mmol),  $[\text{Ag}(\text{CH}_2\text{Cl}_2)_2][\text{Al}(\text{OC}(\text{CF}_3)_3)_4]$  (0.012 g, 0.01 mmol)

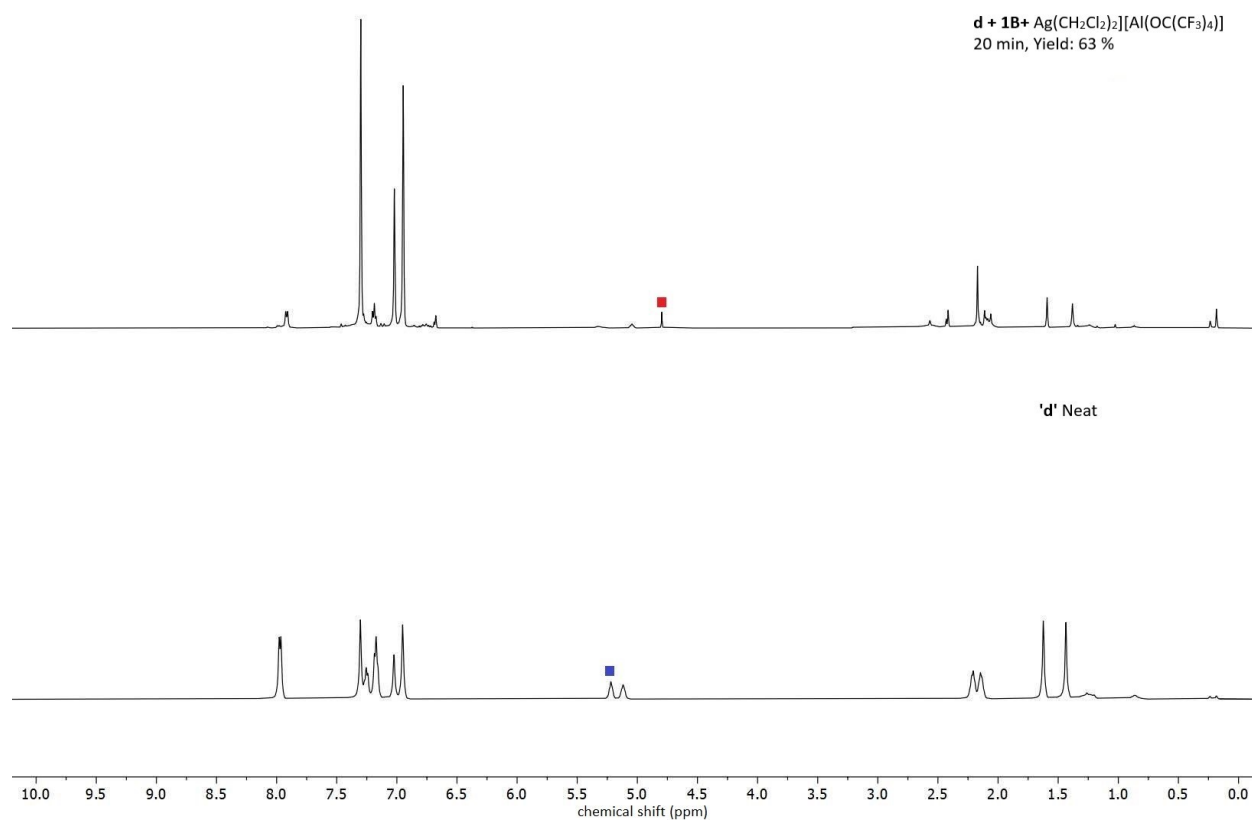

**Figure S58:** Stacked  $^1\text{H}$  NMR spectra of RCCOM: Neat **d** vs reaction after 20 min recorded in  $\text{C}_6\text{D}_5\text{-Br}$ .

#### Metathesis Product (e)

$^1\text{H}$  NMR ( $\text{CD}_2\text{Cl}_2$ , 500 MHz):  $\delta$  2.26 (m, 1H, j-CH<sub>2</sub>), 2.58 (m, 3H, i-CH<sub>2</sub>), 4.95 (ddd, 1H, h-CH), 6.83 (m, 1H, g-CH), 6.94 (m, 1H, f-C<sub>6</sub>H<sub>5</sub>), 7.33-7.38 (m, 9H, a,b,c,d,e-C<sub>6</sub>H<sub>4</sub>)

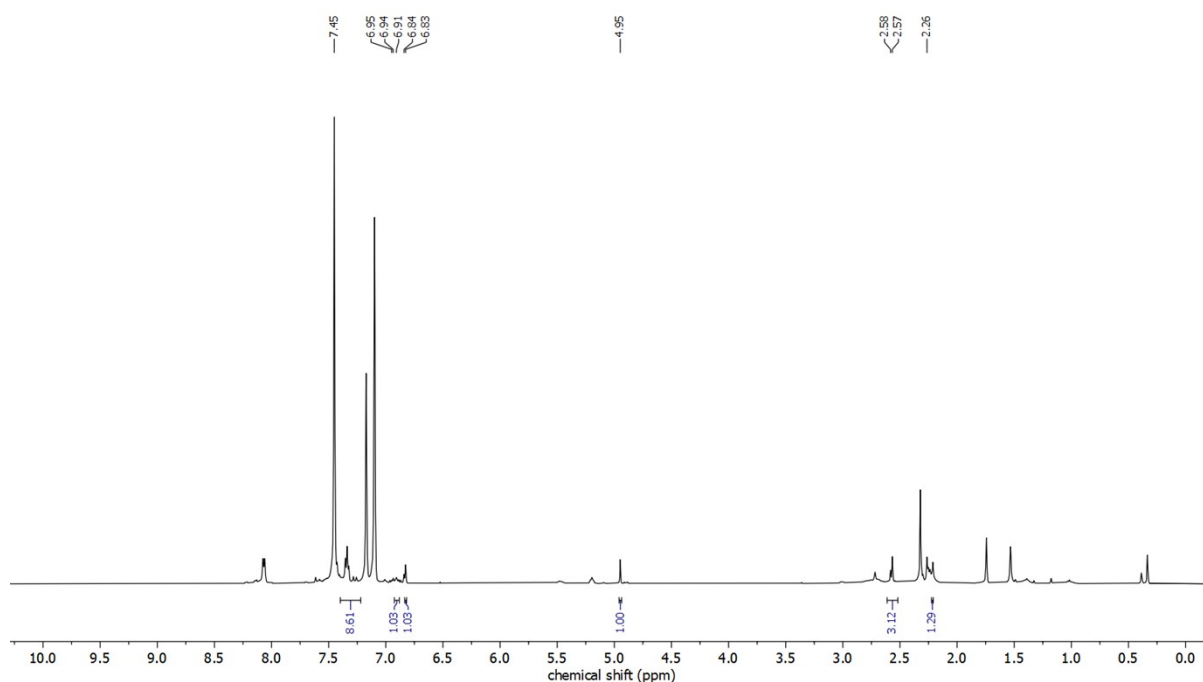

**Figure S59:** Stacked  $^1\text{H}$  NMR spectra of RCCOM reaction using **1B** after 20 min recorded in  $\text{C}_6\text{D}_5\text{-Br}$ .

### Cross Carbonyl Olefin Metathesis (CCOM)

#### Experimental procedure:

**1A/1B** and PhCHO were loaded into a J Young NMR tube. 0.6 mL  $\text{C}_6\text{D}_5\text{-Br}$  was condensed over the mixture.  $[\text{Ag}(\text{CH}_2\text{Cl}_2)_2][\text{Al}(\text{OC}(\text{CF}_3)_3)_4]$  was added to the reaction mixture. Thereafter, the precipitated AgCl was removed from the solution by filtration to another J Young NMR tube after 1 h. To this pale-yellow solution, **b** was added. NMR tube was then sealed and the reaction was kept at  $60\text{ }^\circ\text{C}$  in an oil bath. Reaction was monitored by  $^1\text{H}$  NMR for 12 h.

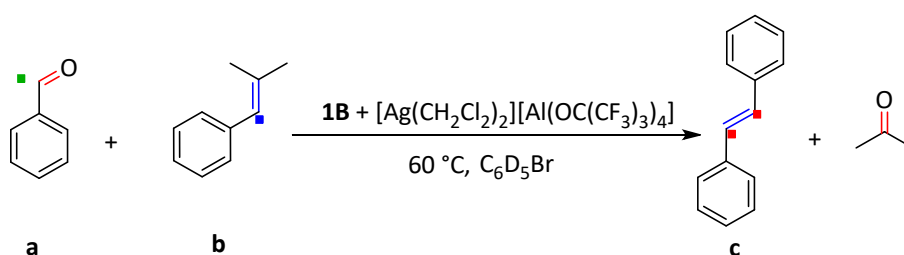

**Scheme S14**

#### Using **1A**

**1A** (0.004 g, 0.01 mmol), PhCHO (1.47  $\mu\text{L}$ , 0.01 mmol),  $[\text{Ag}(\text{CH}_2\text{Cl}_2)_2][\text{Al}(\text{OC}(\text{CF}_3)_3)_4]$  (0.012 g, 0.01 mmol), **b** (1.02  $\mu\text{L}$ , 0.01 mmol)

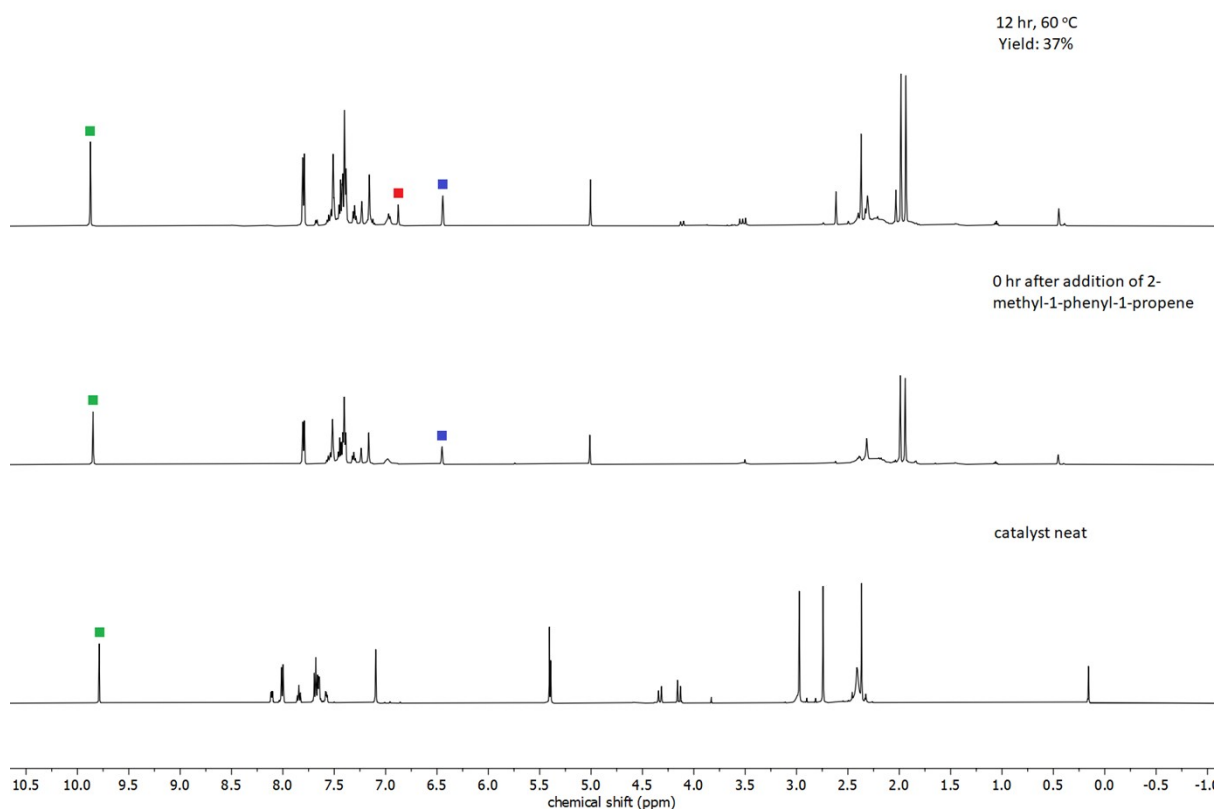

**Figure S60:** Stacked  $^1\text{H}$  NMR spectra of CCOM: Neat catalyst vs reaction after 12 h at 60 °C recorded in  $\text{C}_6\text{D}_5\text{-Br}$ .

**Using 1B**

**1B** (0.004 g, 0.01 mmol), PhCHO (1.47  $\mu\text{L}$ , 0.01 mmol),  $[\text{Ag}(\text{CH}_2\text{Cl}_2)_2][\text{Al}(\text{OC}(\text{CF}_3)_3)_4]$  (0.012 g, 0.01 mmol), **b** (1.02  $\mu\text{L}$ , 0.01 mmol)

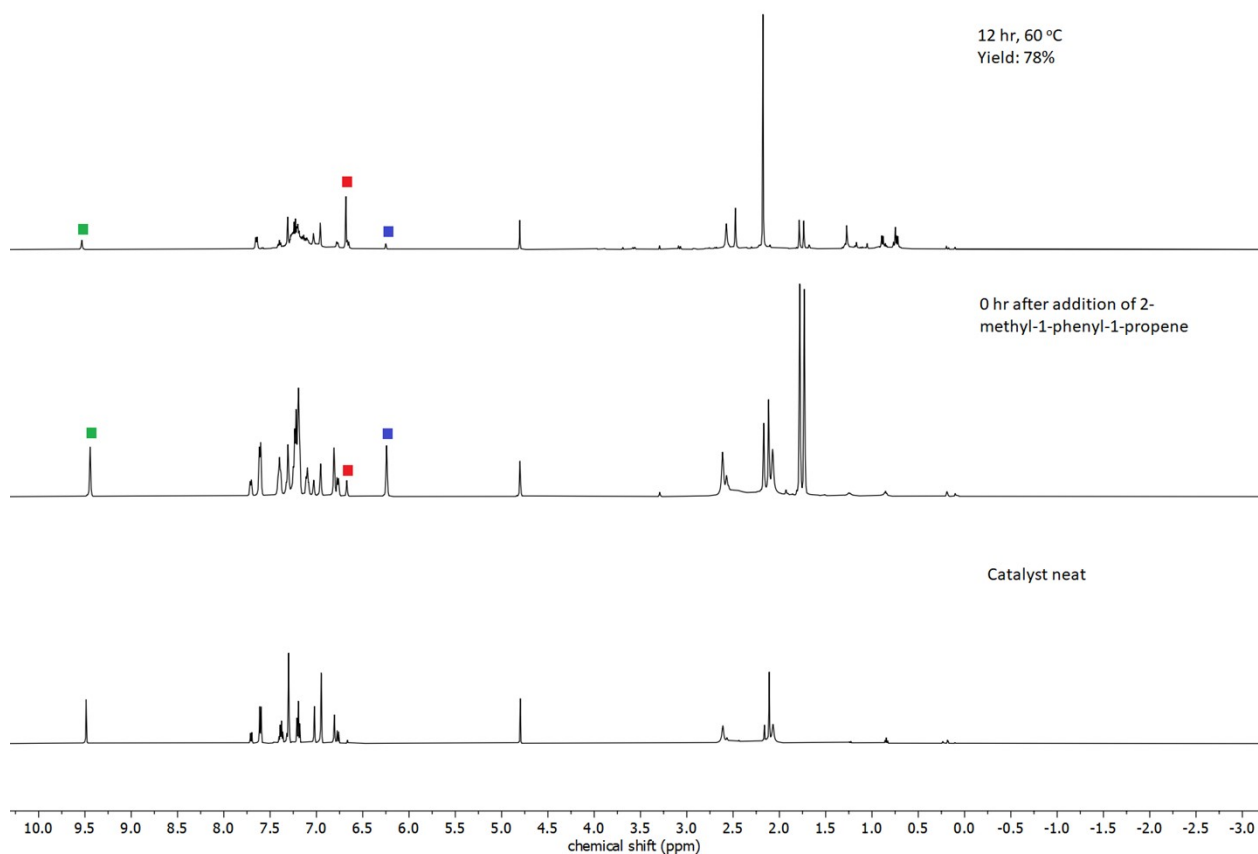

**Figure S61:** Stacked  $^1\text{H}$  NMR spectra of CCOM: Neat catalyst vs reaction after 12 h at 60 °C recorded in  $\text{C}_6\text{D}_5\text{-Br}$ .

**Metathesis product (c):**

$^1\text{H}$  NMR ( $\text{CD}_2\text{Cl}_2$ , 500 MHz):  $\delta$  6.82 (s, 2H, CH), 7.33-7.38 (m, 10H,  $\text{C}_6\text{H}_5$ )

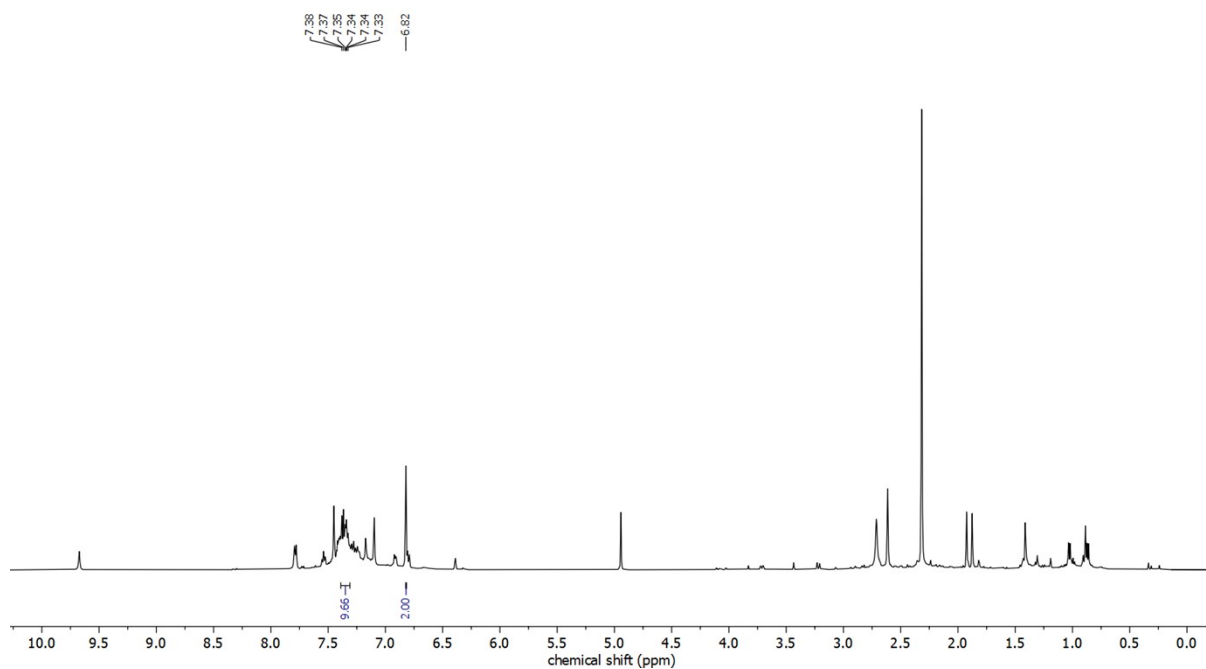

**Figure S62:**  $^1\text{H}$  NMR spectra of CCOM reaction using **1B** after 12 h at 60 °C recorded in  $\text{C}_6\text{D}_5\text{-Br}$ .

### 3. Crystallographic Data

Crystals were layered with paratone oil before mounting on diffractometer. Single-crystal X-ray crystallography for structural analysis was performed on a Bruker Kappa APEX II CCD Diffractometer, using Mo-K $\alpha$  radiation, having a wavelength of 0.71073 Å, equipped with a CCD detector by using the APEX software package.<sup>[9]</sup> A matrix scan was used to determine the initial lattice parameters. Reflections were merged and corrected for Lorenz and polarization effects and background using SAINT.<sup>[10]</sup> Absorption corrections, including odd and even ordered spherical harmonics were performed using SADABS.<sup>[11]</sup> Space group assignments were based upon systematic absences, E statistics, and successful refinement of the structures. The structures were solved by SHELXT (version 2018/2) and refined by SHELXTL (version 2018/3) software package installed in the platform WinGX.<sup>[12,13]</sup> All non-hydrogen atoms, including those in disordered molecules, were refined anisotropically. Hydrogen atoms are placed at calculated positions and refined using a riding model. The structures of **1(A,B)**, **3(A,B)** and the cations of **2(A,B)** and **4(A,B)** is shown in the figure below.

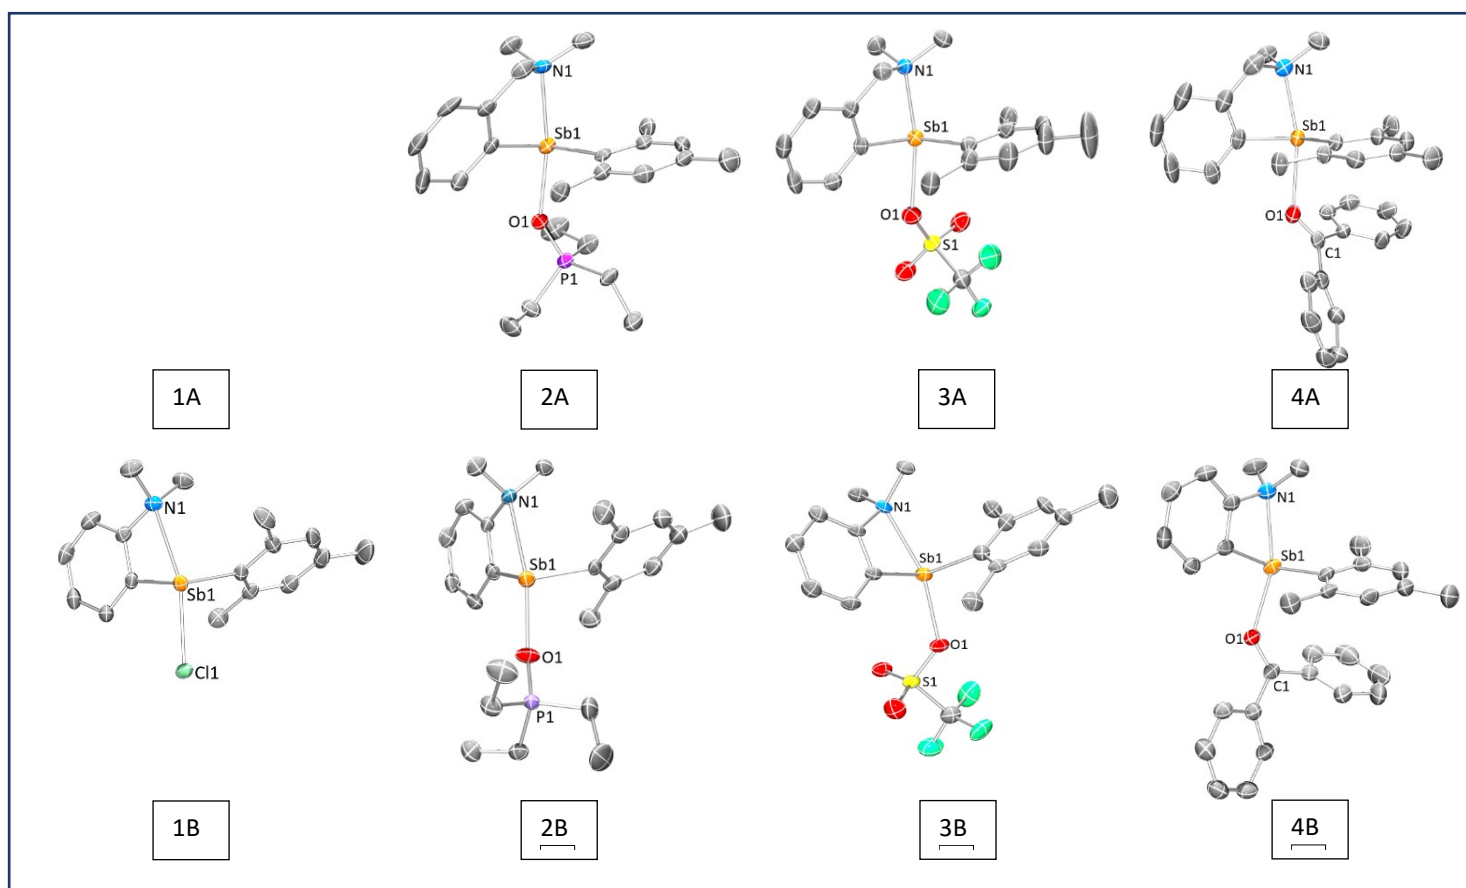

**Figure S63:** Solid-state structures of the complexes **1A-4A** (top, left to right) and **1B-4B** (below, left to right). Ellipsoids are at 35% probability level. Counter anions in **2(A,B)** and **4(A,B)**, and H-atoms in all the structures are omitted for clarity.

**Table S3.** Sb-N and Sb-X bond lengths (Å) and their deviation from the corresponding average covalent bond distances (Å) ( $\sum_{\text{cov}}(\text{Sb}-\text{N})=2.10$  Å,  $\sum_{\text{cov}}(\text{Sb}-\text{Cl})=2.41$  Å and  $\sum_{\text{cov}}(\text{Sb}-\text{O})=2.05$  Å).

|           | Sb-N     | Sb-X     | Sb-N                                    | Sb-X                                    |
|-----------|----------|----------|-----------------------------------------|-----------------------------------------|
|           |          |          | —                                       | —                                       |
|           |          |          | $\sum_{\text{cov}}(\text{Sb}-\text{N})$ | $\sum_{\text{cov}}(\text{Sb}-\text{X})$ |
| <b>1A</b> | 2.480(2) | 2.565(7) | 0.380                                   | 0.155                                   |
| <b>2A</b> | 2.407(6) | 2.220(5) | 0.307                                   | 0.170                                   |
| <b>3A</b> | 2.334(3) | 2.379(2) | 0.234                                   | 0.329                                   |
| <b>4A</b> | 2.312(2) | 2.465(2) | 0.212                                   | 0.415                                   |
| <b>1B</b> | 2.619(3) | 2.469(6) | 0.519                                   | 0.059                                   |
| <b>2B</b> | 2.557(3) | 2.154(2) | 0.457                                   | 0.104                                   |
| <b>3B</b> | 2.451(7) | 2.291(6) | 0.351                                   | 0.241                                   |
| <b>4B</b> | 2.423(4) | 2.340(3) | 0.323                                   | 0.290                                   |

*Estimated standard deviations (esd) in bond lengths do not have implications on our studies in determining primary and secondary interactions while calculating Sb-N and Sb-X bond lengths (Å) deviation from their corresponding average covalent bond distances. This is demonstrated below:*

**1A:** Sb-N=2.480(2) Å, Sb-Cl= 2.565(7) Å

Sb-N, 2.478-2.10= 0.380 Å

Sb-Cl, 2.565-2.41=0.155 Å

Sb-N, esd (+2) 2.482-2.10= 0.382 Å

Sb-Cl, esd (+7) 2.572-2.41= 0.162 Å

esd (-2) 2.478-2.10= 0.378 Å

esd (-7) 2.558-2.41= 0.148 Å

**2A:** Sb-N=2.407(6) Å, Sb-O= 2.220(5) Å

Sb-N, 2.407-2.10= 0.307 Å

Sb-O, 2.220-2.05=0.170 Å

Sb-N, esd (+6) 2.413-2.10= 0.313 Å

Sb-O, esd (+5) 2.225-2.05= 0.175 Å

esd (-6) 2.401-2.10= 0.301 Å

esd (-5) 2.215-2.05= 0.165 Å

As  $\text{Deviation}_{(\text{Sb}-\text{O})} < \text{Deviation}_{(\text{Sb}-\text{N})}$ , Sb-O is the primary interaction.



**3A:** Sb-N=2.334(3) Å, Sb-O= 2.379(2) Å

Sb-N, 2.334-2.10= 0.234 Å

Sb-N, esd (+3) 2.337-2.10= 0.237 Å

esd (-3) 2.331-2.10= 0.231 Å

Sb-O, 2.379-2.05=0.329 Å

Sb-O, esd (+2) 2.381-2.05= 0.331 Å

esd (-2) 2.377-2.05= 0.327 Å

**2B:** Sb-N=2.557(3) Å, Sb-O= 2.154(2) Å

Sb-N, 2.557-2.10= 0.457 Å

Sb-N, esd (+3) 2.56-2.10= 0.460 Å

esd (-3) 2.554-2.10= 0.454 Å

Sb-O, 2.154-2.05=0.104 Å

Sb-O, esd (+2) 2.156-2.05= 0.106 Å

esd (-2) 2.152-2.05= 0.102 Å

**3B:** Sb-N= 2.451(7) Å, Sb-O= 2.291(6) Å

Sb-N, 2.451-2.10= 0.351 Å

Sb-N, esd (+7) 2.458-2.10= 0.358 Å

esd (-7) 2.444-2.10= 0.344 Å

Sb-O, 2.291-2.05=0.241 Å

Sb-O, esd (+6) 2.297-2.05= 0.247 Å

esd (-6) 2.285-2.05= 0.235 Å

**Table S4.** Crystal data and structure refinement for **1A**.

|                                   |                                             |                |
|-----------------------------------|---------------------------------------------|----------------|
| Identification code               | 1A                                          |                |
| CCDC Number                       | 2164736                                     |                |
| Empirical formula                 | C <sub>18</sub> H <sub>23</sub> ClNSb       |                |
| Formula weight                    | 410.57                                      |                |
| Temperature                       | 140(2) K                                    |                |
| Wavelength                        | 0.71073 Å                                   |                |
| Crystal system                    | Monoclinic                                  |                |
| Space group                       | P 21/n                                      |                |
| Unit cell dimensions              | a = 8.7795(16) Å                            | α = 90°        |
|                                   | b = 9.5084(15) Å                            | β = 99.156(6)° |
|                                   | c = 20.932(4) Å                             | γ = 90°        |
| Volume                            | 1725.1(5) Å <sup>3</sup>                    |                |
| Z                                 | 4                                           |                |
| Density (calculated)              | 1.581 Mg/m <sup>3</sup>                     |                |
| Absorption coefficient            | 1.748 mm <sup>-1</sup>                      |                |
| F(000)                            | 824                                         |                |
| Crystal size                      | 0.086 x 0.068 x 0.038 mm <sup>3</sup>       |                |
| Theta range for data collection   | 1.971 to 27.998°                            |                |
| Index ranges                      | -11 ≤ h ≤ 11, -12 ≤ k ≤ 12, -27 ≤ l ≤ 27    |                |
| Reflections collected             | 31810                                       |                |
| Independent reflections           | 4165 [R <sub>(int)</sub> = 0.0423]          |                |
| Completeness to theta = 25.242°   | 99.9 %                                      |                |
| Absorption correction             | Semi-empirical from equivalents             |                |
| Max. and min. transmission        | 0.997 and 0.994                             |                |
| Refinement method                 | Full-matrix least-squares on F <sup>2</sup> |                |
| Data / restraints / parameters    | 4165 / 0 / 195                              |                |
| Goodness-of-fit on F <sup>2</sup> | 1.045                                       |                |
| Final R indices [I > 2σ(I)]       | R1 = 0.0252, wR2 = 0.0566                   |                |
| R indices (all data)              | R1 = 0.0325, wR2 = 0.0594                   |                |
| Extinction coefficient            | n/a                                         |                |
| Largest diff. peak and hole       | 0.760 and -0.478 e.Å <sup>-3</sup>          |                |

**Table S5.** Crystal data and structure refinement for **2A**.

|                                   |                                                         |                 |
|-----------------------------------|---------------------------------------------------------|-----------------|
| Identification code               | 2A                                                      |                 |
| CCDC Number                       | 2164737                                                 |                 |
| Empirical formula                 | C <sub>49</sub> H <sub>52</sub> BNOPCl <sub>10</sub> Sb |                 |
| Formula weight                    | 1188.94                                                 |                 |
| Temperature                       | 140(2) K                                                |                 |
| Wavelength                        | 0.71073 Å                                               |                 |
| Crystal system                    | Monoclinic                                              |                 |
| Space group                       | P 21                                                    |                 |
| Unit cell dimensions              | a = 20.4940(18) Å                                       | α = 90°         |
|                                   | b = 12.5955(11) Å                                       | β = 100.742(2)° |
|                                   | c = 20.8355(18) Å                                       | γ = 90°         |
| Volume                            | 5284.1(8) Å <sup>3</sup>                                |                 |
| Z                                 | 4                                                       |                 |
| Density (calculated)              | 1.495 Mg/m <sup>3</sup>                                 |                 |
| Absorption coefficient            | 1.095 mm <sup>-1</sup>                                  |                 |
| F(000)                            | 2408                                                    |                 |
| Crystal size                      | 0.096 x 0.075 x 0.048 mm <sup>3</sup>                   |                 |
| Theta range for data collection   | 0.995 to 25.000°.                                       |                 |
| Index ranges                      | -24 ≤ h ≤ 24, -14 ≤ k ≤ 14, -23 ≤ l ≤ 24                |                 |
| Reflections collected             | 54028                                                   |                 |
| Independent reflections           | 18591 [R <sub>(int)</sub> = 0.0537]                     |                 |
| Completeness to theta = 25.000°   | 99.9 %                                                  |                 |
| Absorption correction             | Semi-empirical from equivalents                         |                 |
| Max. and min. transmission        | 0.949 and 0.902                                         |                 |
| Refinement method                 | Full-matrix least-squares on F <sup>2</sup>             |                 |
| Data / restraints / parameters    | 18591 / 2 / 1169                                        |                 |
| Goodness-of-fit on F <sup>2</sup> | 1.037                                                   |                 |
| Final R indices [I > 2σ(I)]       | R1 = 0.0440, wR2 = 0.0854                               |                 |
| R indices (all data)              | R1 = 0.0614, wR2 = 0.0920                               |                 |
| Absolute structure parameter      | -0.027(9)                                               |                 |
| Extinction coefficient            | n/a                                                     |                 |
| Largest diff. peak and hole       | 0.819 and -0.610 e.Å <sup>-3</sup>                      |                 |

**Table S6.** Crystal data and structure refinement for **3A**.

|                                   |                                                                    |                 |
|-----------------------------------|--------------------------------------------------------------------|-----------------|
| Identification code               | 3A                                                                 |                 |
| CCDC Number                       | 2164738                                                            |                 |
| Empirical formula                 | C <sub>19</sub> H <sub>23</sub> NO <sub>3</sub> F <sub>3</sub> SSb |                 |
| Formula weight                    | 524.19                                                             |                 |
| Temperature                       | 150(2) K                                                           |                 |
| Wavelength                        | 0.71073 Å                                                          |                 |
| Crystal system                    | Monoclinic                                                         |                 |
| Space group                       | P 21/n                                                             |                 |
| Unit cell dimensions              | a = 14.0671(18) Å                                                  | α = 90°         |
|                                   | b = 9.5855(11) Å                                                   | β = 110.010(5)° |
|                                   | c = 17.307(3) Å                                                    | γ = 90°         |
| Volume                            | 2192.8(5) Å <sup>3</sup>                                           |                 |
| Z                                 | 4                                                                  |                 |
| Density (calculated)              | 1.588 mg/m <sup>3</sup>                                            |                 |
| Absorption coefficient            | 1.397 mm <sup>-1</sup>                                             |                 |
| F(000)                            | 1048                                                               |                 |
| Crystal size                      | 0.068 x 0.038 x 0.028 mm <sup>3</sup>                              |                 |
| Theta range for data collection   | 2.466 to 24.997°                                                   |                 |
| Index ranges                      | -16 ≤ h ≤ 16, -11 ≤ k ≤ 11, -20 ≤ l ≤ 20                           |                 |
| Reflections collected             | 23704                                                              |                 |
| Independent reflections           | 3874 [R <sub>(int)</sub> = 0.0610]                                 |                 |
| Completeness to theta = 24.997°   | 99.9 %                                                             |                 |
| Absorption correction             | Semi-empirical from equivalents                                    |                 |
| Max. and min. transmission        | 0.962 and 0.911                                                    |                 |
| Refinement method                 | Full-matrix least-squares on F <sup>2</sup>                        |                 |
| Data / restraints / parameters    | 3874 / 0 / 258                                                     |                 |
| Goodness-of-fit on F <sup>2</sup> | 1.024                                                              |                 |
| Final R indices [I > 2σ(I)]       | R <sub>1</sub> = 0.0304, wR <sub>2</sub> = 0.0645                  |                 |
| R indices (all data)              | R <sub>1</sub> = 0.0458, wR <sub>2</sub> = 0.0709                  |                 |
| Extinction coefficient            | n/a                                                                |                 |
| Largest diff. peak and hole       | 0.655 and -0.407 e.Å <sup>-3</sup>                                 |                 |

**Table S7.** Crystal data and structure refinement for **4A**.

|                                   |                                                                                                                          |
|-----------------------------------|--------------------------------------------------------------------------------------------------------------------------|
| Identification code               | 4A                                                                                                                       |
| CCDC Number                       | 2164742                                                                                                                  |
| Empirical formula                 | C <sub>47</sub> H <sub>33</sub> AlF <sub>36</sub> NO <sub>5</sub> Sb                                                     |
| Formula weight                    | 1524.47                                                                                                                  |
| Temperature                       | 140(2) K                                                                                                                 |
| Wavelength                        | 0.71073 Å                                                                                                                |
| Crystal system                    | Triclinic                                                                                                                |
| Space group                       | P -1                                                                                                                     |
| Unit cell dimensions              | a = 13.7542(11) Å      α = 97.575(3)°<br>b = 14.4647(12) Å      β = 112.199(2)°<br>c = 15.6531(13) Å      γ = 98.467(3)° |
| Volume                            | 2791.5(4) Å <sup>3</sup>                                                                                                 |
| Z                                 | 2                                                                                                                        |
| Density (calculated)              | 1.814 Mg/m <sup>3</sup>                                                                                                  |
| Absorption coefficient            | 0.677 mm <sup>-1</sup>                                                                                                   |
| F(000)                            | 1500                                                                                                                     |
| Crystal size                      | 0.075 x 0.045 x 0.038 mm <sup>3</sup>                                                                                    |
| Theta range for data collection   | 1.435 to 24.998°                                                                                                         |
| Index ranges                      | -16 ≤ h ≤ 16, -17 ≤ k ≤ 17, -18 ≤ l ≤ 18                                                                                 |
| Reflections collected             | 69803                                                                                                                    |
| Independent reflections           | 9825 [R <sub>(int)</sub> = 0.0423]                                                                                       |
| Completeness to theta = 24.998°   | 99.9 %                                                                                                                   |
| Absorption correction             | Semi-empirical from equivalents                                                                                          |
| Max. and min. transmission        | 0.975 and 0.951                                                                                                          |
| Refinement method                 | Full-matrix least-squares on F <sup>2</sup>                                                                              |
| Data / restraints / parameters    | 9825 / 82 / 1024                                                                                                         |
| Goodness-of-fit on F <sup>2</sup> | 1.031                                                                                                                    |
| Final R indices [I > 2σ(I)]       | R1 = 0.0312, wR2 = 0.0693                                                                                                |
| R indices (all data)              | R1 = 0.0397, wR2 = 0.0747                                                                                                |
| Extinction coefficient            | n/a                                                                                                                      |
| Largest diff. peak and hole       | 0.567 and -0.512 e.Å <sup>-3</sup>                                                                                       |

**Table S8.** Crystal data and structure refinement for **1B**.

|                                   |                                             |                 |
|-----------------------------------|---------------------------------------------|-----------------|
| Identification code               | 1B                                          |                 |
| CCDC Number                       | 2164735                                     |                 |
| Empirical formula                 | C <sub>17</sub> H <sub>21</sub> ClNSb       |                 |
| Formula weight                    | 396.55                                      |                 |
| Temperature                       | 150(2) K                                    |                 |
| Wavelength                        | 0.71073 Å                                   |                 |
| Crystal system                    | Monoclinic                                  |                 |
| Space group                       | P 21/c                                      |                 |
| Unit cell dimensions              | a = 8.6015(6) Å                             | α = 90°         |
|                                   | b = 12.9734(9) Å                            | β = 103.132(2)° |
|                                   | c = 15.5648(10) Å                           | γ = 90°         |
| Volume                            | 1691.5(2) Å <sup>3</sup>                    |                 |
| Z                                 | 4                                           |                 |
| Density (calculated)              | 1.557 Mg/m <sup>3</sup>                     |                 |
| Absorption coefficient            | 1.780 mm <sup>-1</sup>                      |                 |
| F(000)                            | 792                                         |                 |
| Crystal size                      | 0.125 x 0.085 x 0.045 mm <sup>3</sup>       |                 |
| Theta range for data collection   | 2.431 to 28.000°                            |                 |
| Index ranges                      | -11 ≤ h ≤ 11, -17 ≤ k ≤ 17, -20 ≤ l ≤ 20    |                 |
| Reflections collected             | 23276                                       |                 |
| Independent reflections           | 4095 [R <sub>(int)</sub> = 0.0366]          |                 |
| Completeness to theta = 25.242°   | 100.0 %                                     |                 |
| Absorption correction             | Semi-empirical from equivalents             |                 |
| Max. and min. transmission        | 0.924 and 0.808                             |                 |
| Refinement method                 | Full-matrix least-squares on F <sup>2</sup> |                 |
| Data / restraints / parameters    | 4095 / 0 / 186                              |                 |
| Goodness-of-fit on F <sup>2</sup> | 1.075                                       |                 |
| Final R indices [I > 2σ(I)]       | R1 = 0.0235, wR2 = 0.0563                   |                 |
| R indices (all data)              | R1 = 0.0297, wR2 = 0.0592                   |                 |
| Extinction coefficient            | n/a                                         |                 |
| Largest diff. peak and hole       | 0.596 and -0.488 e.Å <sup>-3</sup>          |                 |

**Table S9.** Crystal data and structure refinement for **2B**.

|                                   |                                                        |                 |
|-----------------------------------|--------------------------------------------------------|-----------------|
| Identification code               | 2B                                                     |                 |
| CCDC Number                       | 2164740                                                |                 |
| Empirical formula                 | C <sub>47</sub> H <sub>48</sub> BNOPCl <sub>8</sub> Sb |                 |
| Formula weight                    | 1089.99                                                |                 |
| Temperature                       | 150(2) K                                               |                 |
| Wavelength                        | 0.71073 Å                                              |                 |
| Crystal system                    | Monoclinic                                             |                 |
| Space group                       | P 21/n                                                 |                 |
| Unit cell dimensions              | a = 12.3460(7) Å                                       | α = 90°         |
|                                   | b = 22.8428(13) Å                                      | β = 103.197(2)° |
|                                   | c = 17.8648(10) Å                                      | γ = 90°         |
| Volume                            | 4905.1(5) Å <sup>3</sup>                               |                 |
| Z                                 | 4                                                      |                 |
| Density (calculated)              | 1.476 mg/m <sup>3</sup>                                |                 |
| Absorption coefficient            | 1.067 mm <sup>-1</sup>                                 |                 |
| F(000)                            | 2208                                                   |                 |
| Crystal size                      | 0.076 x 0.054 x 0.037 mm <sup>3</sup>                  |                 |
| Theta range for data collection   | 2.133 to 24.999°.                                      |                 |
| Index ranges                      | -14 ≤ h ≤ 14, -27 ≤ k ≤ 27, -20 ≤ l ≤ 21               |                 |
| Reflections collected             | 68011                                                  |                 |
| Independent reflections           | 8637 [R <sub>int</sub> = 0.0600]                       |                 |
| Completeness to theta = 24.999°   | 99.9 %                                                 |                 |
| Absorption correction             | Semi-empirical from equivalents                        |                 |
| Max. and min. transmission        | 0.962 and 0.923                                        |                 |
| Refinement method                 | Full-matrix least-squares on F <sup>2</sup>            |                 |
| Data / restraints / parameters    | 8637 / 0 / 549                                         |                 |
| Goodness-of-fit on F <sup>2</sup> | 1.049                                                  |                 |
| Final R indices [I > 2σ(I)]       | R <sub>1</sub> = 0.0362, wR <sub>2</sub> = 0.0841      |                 |
| R indices (all data)              | R <sub>1</sub> = 0.0511, wR <sub>2</sub> = 0.0927      |                 |
| Extinction coefficient            | n/a                                                    |                 |
| Largest diff. peak and hole       | 1.206 and -0.890 e.Å <sup>-3</sup>                     |                 |

**Table S10.** Crystal data and structure refinement for **3B**.

|                                   |                                                                    |                 |
|-----------------------------------|--------------------------------------------------------------------|-----------------|
| Identification code               | 3B                                                                 |                 |
| CCDC Number                       | 2164739                                                            |                 |
| Empirical formula                 | C <sub>18</sub> H <sub>21</sub> F <sub>3</sub> NO <sub>3</sub> SSb |                 |
| Formula weight                    | 510.17                                                             |                 |
| Temperature                       | 150(2) K                                                           |                 |
| Wavelength                        | 0.71073 Å                                                          |                 |
| Crystal system                    | Monoclinic                                                         |                 |
| Space group                       | P 21/n                                                             |                 |
| Unit cell dimensions              | a = 8.401(5) Å                                                     | α = 90°         |
|                                   | b = 9.453(6) Å                                                     | β = 96.737(13)° |
|                                   | c = 25.467(16) Å                                                   | γ = 90°         |
| Volume                            | 2009(2) Å <sup>3</sup>                                             |                 |
| Z                                 | 4                                                                  |                 |
| Density (calculated)              | 1.687 Mg/m <sup>3</sup>                                            |                 |
| Absorption coefficient            | 1.522 mm <sup>-1</sup>                                             |                 |
| F(000)                            | 1016                                                               |                 |
| Crystal size                      | 0.250 x 0.150 x 0.020 mm <sup>3</sup>                              |                 |
| Theta range for data collection   | 1.610 to 24.999°.                                                  |                 |
| Index ranges                      | -9<=h<=9, -11<=k<=11, -30<=l<=30                                   |                 |
| Reflections collected             | 34625                                                              |                 |
| Independent reflections           | 3518 [R <sub>(int)</sub> = 0.1101]                                 |                 |
| Completeness to theta = 24.999°   | 99.9 %                                                             |                 |
| Absorption correction             | Semi-empirical from equivalents                                    |                 |
| Max. and min. transmission        | 0.970 and 0.702                                                    |                 |
| Refinement method                 | Full-matrix least-squares on F <sup>2</sup>                        |                 |
| Data / restraints / parameters    | 3518 / 0 / 249                                                     |                 |
| Goodness-of-fit on F <sup>2</sup> | 1.166                                                              |                 |
| Final R indices [I>2σ(I)]         | R1 = 0.0624, wR2 = 0.1376                                          |                 |
| R indices (all data)              | R1 = 0.0789, wR2 = 0.1454                                          |                 |
| Extinction coefficient            | n/a                                                                |                 |
| Largest diff. peak and hole       | 1.403 and -2.479 e.Å <sup>-3</sup>                                 |                 |



**Table S11.** Crystal data and structure refinement for **4B**.

|                                      |                                             |                             |
|--------------------------------------|---------------------------------------------|-----------------------------|
| Identification code                  | 4B                                          |                             |
| CCDC Number                          | 2164741                                     |                             |
| Empirical formula                    | $C_{47}H_{33}AlCl_2F_{36}NO_5Sb$            |                             |
| Formula weight                       | 1595.37                                     |                             |
| Temperature                          | 150(2) K                                    |                             |
| Wavelength                           | 0.71073 Å                                   |                             |
| Crystal system                       | Triclinic                                   |                             |
| Space group                          | P -1                                        |                             |
| Unit cell dimensions                 | $a = 12.3903(18)$ Å                         | $\alpha = 99.484(5)^\circ$  |
|                                      | $b = 15.266(2)$ Å                           | $\beta = 109.810(5)^\circ$  |
|                                      | $c = 17.646(3)$ Å                           | $\gamma = 106.208(4)^\circ$ |
| Volume                               | $2888.4(7)$ Å <sup>3</sup>                  |                             |
| Z                                    | 2                                           |                             |
| Density (calculated)                 | 1.834 Mg/m <sup>3</sup>                     |                             |
| Absorption coefficient               | 0.748 mm <sup>-1</sup>                      |                             |
| F(000)                               | 1568                                        |                             |
| Crystal size                         | 0.075 x 0.065 x 0.045 mm <sup>3</sup>       |                             |
| Theta range for data collection      | 1.789 to 24.999°                            |                             |
| Index ranges                         | -14 ≤ h ≤ 14, -18 ≤ k ≤ 18, -20 ≤ l ≤ 20    |                             |
| Reflections collected                | 71280                                       |                             |
| Independent reflections              | 10155 [ $R_{(int)} = 0.0827$ ]              |                             |
| Completeness to theta = 24.999°      | 99.9 %                                      |                             |
| Absorption correction                | Semi-empirical from equivalents             |                             |
| Max. and min. transmission           | 0.967 and 0.946                             |                             |
| Refinement method                    | Full-matrix least-squares on F <sup>2</sup> |                             |
| Data / restraints / parameters       | 10155 / 558 / 1280                          |                             |
| Goodness-of-fit on F <sup>2</sup>    | 1.041                                       |                             |
| Final R indices [ $I > 2\sigma(I)$ ] | $R_1 = 0.0530$ , $wR_2 = 0.1135$            |                             |
| R indices (all data)                 | $R_1 = 0.0809$ , $wR_2 = 0.1319$            |                             |
| Extinction coefficient               | n/a                                         |                             |
| Largest diff. peak and hole          | 0.637 and -0.712 e.Å <sup>-3</sup>          |                             |

#### 4. Computational Details

Theoretical calculations were performed to provide additional insight into the bonding at the Sb(III) center of complexes **1(A,B)**, **3(A,B)** and the cations of **2(A,B)** and **4(A,B)**. The structures have been optimized using density functional theory with the B3LYP<sup>[14]</sup> functional corrected by Grimme's D3<sup>[15]</sup> dispersion (B3LYP-D3) using the Gaussian 16 program package, revision c.<sup>[16]</sup> Def2-TZVP<sup>[17]</sup> basis set was used to describe all atoms in the molecules. The effect of solvents was accounted for by applying the polarizable continuum model (PCM) for the respective solvents. The vibrational frequencies for the optimized geometries were calculated at the same level of theory. The absence of any imaginary frequencies allowed us to characterize them as true minima on their respective potential energy hypersurfaces. The results from DFT calculations and structural data from XRD analysis is presented below.

**Table S12:** A comparison of the XRD and calculated bond lengths of isolated molecules. There is reasonable parity between the two except in the case of molecule **1A** and **1B**.

| Compound  | XRD      |          | DFT   |       |
|-----------|----------|----------|-------|-------|
|           | Sb—N (Å) | Sb—X (Å) | Sb-N  | Sb-X  |
| <b>1A</b> | 2.480    | 2.565    | 2.692 | 2.504 |
| <b>2A</b> | 2.407    | 2.220    | 2.485 | 2.254 |
| <b>3A</b> | 2.334    | 2.379    | 2.445 | 2.368 |
| <b>4A</b> | 2.312    | 2.465    | 2.388 | 2.529 |
| <b>1B</b> | 2.619    | 2.469    | 2.795 | 2.465 |
| <b>2B</b> | 2.557    | 2.154    | 2.601 | 2.176 |
| <b>3B</b> | 2.451    | 2.291    | 2.553 | 2.268 |
| <b>4B</b> | 2.423    | 2.340    | 2.486 | 2.358 |

To understand the large deviation observed in the Sb-N distance in **1A**, between the computed and the X-ray value, preliminary investigations were performed on the solid state crystal structure of **1A** in our set of compounds using the Vienna Ab initio Simulation Package<sup>[18]</sup> (VASP) with PBE<sup>[19]</sup> functional and plane wave basis set was used to model the atoms (vide infra). The energy cut-off for the plane wave basis set was chosen to be 450 eV and the electronic energy convergence threshold was set at  $10^{-7}$  eV while that for force is  $10^{-3}$  eV/Å. This brought the Sb-N distance closer to that obtained from the X-Ray analysis. To eliminate the possibility that this change in the computed value arose from the new functional, the structure of **1A** was again optimized using VASP at the same level by removing all atoms aside from those belonging to a single molecule of complex **1A** from the unit cell and introducing a separation of 20 Å between each molecule – essentially isolating the single molecule. This Sb-N distance is closer to that calculated for the isolated molecule calculated at B3LYP-D3/Def2-TZVP level. If these structures are compared, it is clear that the short Sb-N

bond observed in the X-ray analysis of **1A** is the result of intermolecular interactions/packing forces in the solid state which are particularly large for Cl substituent. It is reasonable to assume that effective Sb-N distance in solution is significantly longer than that observed in the solid state. The Sb-Cl bond shows a corresponding shrinking. This indicates a possible interaction between Cl atom and its several neighboring H atoms in the crystal.

**Table S13:** A comparison of the XRD and calculated bond lengths (Å) for **1A** and **1B**.

| Molecule  | XRD Data |       | G16<br>Optimisation<br>(PCM) |       | Solid State Optimisation (VASP) |       |                 |       |
|-----------|----------|-------|------------------------------|-------|---------------------------------|-------|-----------------|-------|
|           |          |       |                              |       | Crystal                         |       | Single Molecule |       |
|           | Sb-N     | Sb-Cl | Sb-N                         | Sb-Cl | Sb-N                            | Sb-Cl | Sb-N            | Sb-Cl |
| <b>1A</b> | 2.480    | 2.565 | 2.692                        | 2.504 | 2.518                           | 2.584 | 2.717           | 2.480 |
| <b>1B</b> | 2.619    | 2.469 | 2.795                        | 2.465 | 2.629                           | 2.501 | 2.802           | 2.453 |

In the following step, population analyses of these optimized geometries were performed using the NBO6 package<sup>[20]</sup> in conjunction with Gaussian09 revision d.<sup>[21]</sup> Donor acceptor interactions between vacant and occupied natural bond orbitals (NBO) was evaluated using second order perturbation theory, implemented along with NBO analysis. The relative energetic importance of the interaction between the unoccupied Lewis vacant orbital on Sb and the lone pairs on N and X have been evaluated for complexes **1(A,B)**, **3(A,B)** and the cations of **2(A,B)** and **4(A,B)** through this well-established method. To this end, the Lewis structure where a Lewis vacant orbital on Sb and lone pairs on N and X of appropriate symmetry were chosen or was explicitly selected using the \$CHOOSE functionality in NBO analysis when that was not the default Lewis structure chosen by the program. The analysis shows that the donor strength of nucleophilic substrate follows the order: Cl<sup>-</sup> >> OPET<sub>3</sub> > TfO<sup>-</sup> > Ph<sub>2</sub>CO and the Sb-N interaction shows a corresponding progressive weakening. The effect of substrates as diverse as the set chosen in this study can be normalized by looking at the effect they have on the trans Sb-N bond. Therefore, the Sb-N bond strength has been chosen as the x-axis in figure 1 of the article.

**Table S14:** Energy of interaction between Sb and N ( $lp(N) \rightarrow p(Sb)$ ) and that between Sb and X ( $lp(X) \rightarrow p(Sb)$ ) as calculated by second order perturbation analysis implemented in the NBO package

| Compound  | $lp(N) \rightarrow p(Sb)$<br>(kcal/mol) | $lp(X) \rightarrow p(Sb)$<br>(kcal/mol) |
|-----------|-----------------------------------------|-----------------------------------------|
| <b>1A</b> | 29.95                                   | 158.19                                  |
| <b>2A</b> | 48.52                                   | 66.24                                   |
| <b>3A</b> | 53.21                                   | 56.59                                   |
| <b>4A</b> | 66.25                                   | 31.72                                   |
| <b>1B</b> | 19.08                                   | 167.75                                  |
| <b>2B</b> | 32.68                                   | 81.37                                   |
| <b>3B</b> | 37.06                                   | 70.87                                   |
| <b>4B</b> | 48.43                                   | 51.64                                   |

Finally, The extent of activation of carbonyl compounds relative to their free state have been further investigated theoretically by studying the benzaldehyde and phenyl benzoate adducts of  $[(NMe_2CH_2C_6H_4)(mesityl)Sb]^+$  and  $[(NMe_2C_6H_4)(mesityl)Sb]^+$  and comparing the results with **4A** and **4B**. The C=O bond length and the natural charges on the carbonyl C and O obtained from natural population analysis have been noted. In each case, the extent of activation by cation  $[(NMe_2C_6H_4)(mesityl)Sb]^+$  is found to be greater.

**Table S15:** Natural charges on the carbonyl C and O atoms using DFT at B3LYP-D3/Def2-TZVP level:

| Compound                                      | Computed C=O<br>bond length (Å) | NBO Charges on C=O |        |
|-----------------------------------------------|---------------------------------|--------------------|--------|
|                                               |                                 | C                  | O      |
| Ph <sub>2</sub> CO                            | 1.223                           | 0.528              | -0.526 |
| <b>4A</b>                                     | 1.241                           | 0.589              | -0.621 |
| <b>4B</b>                                     | 1.249                           | 0.600              | -0.628 |
| PhCHO                                         | 1.214                           | 0.405              | -0.509 |
| $[(NMe_2CH_2C_6H_4)(mesityl)(PhCHO)Sb]^+$     | 1.227                           | 0.453              | -0.593 |
| $[(NMe_2C_6H_4)(mesityl)(PhCHO)Sb]^+$         | 1.233                           | 0.452              | -0.607 |
| PhCH <sub>2</sub> OC(O)Ph                     | 1.213                           | 0.751              | -0.588 |
| $[(NMe_2CH_2C_6H_4)(mesityl)(PhCO(O)Ph)Sb]^+$ | 1.230                           | 0.803              | -0.667 |
| $[(NMe_2C_6H_4)(mesityl)(PhCO(O)Ph)Sb]^+$     | 1.238                           | 0.813              | -0.672 |

### DFT optimized structural Coordinates:

The coordinates of the optimized geometries of neutral complexes **1(A,B)**, **3(A,B)** and cationic complexes **2(A, B)**, **4(A, B)** as well as complexes of cation **A** and **B** with PHCHO and PhC(O)OPh are provided below.

#### 1A

Sum of electronic and zero-point energies = -1455.091123 a.u.

|    |          |          |          |
|----|----------|----------|----------|
| C  | 1.975334 | -0.1907  | 0.310064 |
| C  | 2.936952 | -1.17609 | 0.520553 |
| H  | 2.870388 | -2.11731 | -0.00957 |
| C  | 3.971638 | -0.97732 | 1.430199 |
| H  | 4.707875 | -1.75597 | 1.586942 |
| C  | 4.05755  | 0.218407 | 2.132803 |
| H  | 4.861093 | 0.380716 | 2.84015  |
| C  | 3.11052  | 1.213139 | 1.916827 |
| H  | 3.179402 | 2.150089 | 2.457997 |
| C  | 2.069733 | 1.017658 | 1.011741 |
| C  | 1.014061 | 2.077519 | 0.830492 |
| H  | 1.36726  | 3.046203 | 1.210426 |
| H  | 0.127595 | 1.807682 | 1.411497 |
| C  | 1.65525  | 2.755891 | -1.41373 |
| H  | 1.895581 | 3.785277 | -1.11618 |
| H  | 2.557613 | 2.152635 | -1.32898 |
| H  | 1.333563 | 2.757355 | -2.4547  |
| C  | -0.62682 | 3.004123 | -0.67952 |
| H  | -0.46625 | 4.016281 | -0.28449 |
| H  | -0.92113 | 3.089344 | -1.72448 |
| H  | -1.43501 | 2.531081 | -0.12502 |
| C  | -1.40794 | -0.33488 | -0.0069  |
| C  | -1.51073 | -0.68841 | 1.351644 |
| C  | -2.73488 | -0.52083 | 2.004472 |
| H  | -2.80666 | -0.79624 | 3.051342 |
| C  | -3.86402 | -0.03336 | 1.357948 |
| C  | -3.7578  | 0.259379 | 0.002278 |
| C  | -2.55775 | 0.109293 | -0.69119 |
| C  | -0.37374 | -1.27443 | 2.151931 |
| H  | -0.757   | -1.75871 | 3.05025  |
| H  | 0.181612 | -2.01461 | 1.57874  |
| H  | 0.337809 | -0.5105  | 2.468742 |
| C  | -5.15823 | 0.173968 | 2.098209 |
| H  | -5.24238 | -0.50124 | 2.950746 |
| H  | -5.22538 | 1.196223 | 2.482159 |
| N  | 0.590175 | 2.194156 | -0.5731  |
| Sb | 0.425542 | -0.41799 | -1.20196 |
| Cl | 0.506121 | -2.91893 | -1.10756 |

|   |          |          |          |
|---|----------|----------|----------|
| H | -6.01938 | 0.013639 | 1.44768  |
| H | -4.63583 | 0.601512 | -0.53497 |
| C | -2.56839 | 0.388929 | -2.1779  |
| H | -3.53632 | 0.782676 | -2.48774 |
| H | -1.81075 | 1.113481 | -2.47824 |
| H | -2.38619 | -0.52329 | -2.75169 |

## 1B

Sum of electronic and zero-point energies = -1415.784429 a.u.

|   |          |          |          |
|---|----------|----------|----------|
| C | -1.90801 | 0.022461 | 0.359556 |
| C | -1.94043 | -1.33529 | 0.06841  |
| C | -2.81496 | -2.18679 | 0.737949 |
| H | -2.83101 | -3.24694 | 0.516421 |
| C | -3.66961 | -1.65578 | 1.698866 |
| C | -3.65146 | -0.29075 | 1.981278 |
| H | -4.32306 | 0.113147 | 2.728746 |
| C | -2.77114 | 0.553386 | 1.310774 |
| H | -2.74461 | 1.612139 | 1.537995 |
| C | 0.003497 | -2.70218 | -0.46926 |
| H | 0.487708 | -2.28591 | 0.411214 |
| H | 0.760936 | -2.84398 | -1.24086 |
| H | -0.42407 | -3.68088 | -0.21557 |
| C | -1.68469 | -2.27311 | -2.16216 |
| H | -2.20629 | -3.22181 | -1.98074 |
| H | -0.94217 | -2.43233 | -2.94509 |
| H | -2.40986 | -1.53991 | -2.51342 |
| C | 1.377564 | 0.327127 | -0.00725 |
| C | 2.379738 | -0.10491 | -0.89849 |
| C | 3.586595 | -0.58752 | -0.39486 |
| H | 4.350426 | -0.92054 | -1.08937 |
| C | 3.837736 | -0.65342 | 0.971549 |
| C | 2.836692 | -0.22676 | 1.836155 |
| H | 3.010577 | -0.27421 | 2.905917 |
| C | 1.609858 | 0.260211 | 1.379189 |
| C | 2.199246 | -0.09161 | -2.40046 |
| H | 3.096947 | -0.45826 | -2.89789 |
| H | 2.0013   | 0.912942 | -2.781   |
| H | 1.368411 | -0.72779 | -2.71628 |
| C | 5.162601 | -1.13986 | 1.494869 |
| H | 5.061207 | -1.58447 | 2.485878 |
| C | 0.587917 | 0.655787 | 2.414529 |
| H | -0.20598 | -0.09013 | 2.483838 |
| H | 0.114958 | 1.607279 | 2.180649 |
| H | 1.052279 | 0.738577 | 3.397222 |

|    |          |          |          |
|----|----------|----------|----------|
| Cl | -0.66747 | 3.170835 | 0.159927 |
| Sb | -0.48509 | 0.977662 | -0.9496  |
| N  | -1.01463 | -1.76679 | -0.9596  |
| H  | -4.3537  | -2.30731 | 2.227943 |
| H  | 5.606315 | -1.88175 | 0.82915  |
| H  | 5.871738 | -0.31127 | 1.579213 |

## 2A

Sum of electronic and zero-point energies = -1648.978383 a.u.

|   |          |          |          |
|---|----------|----------|----------|
| C | -1.92321 | -1.34874 | 0.332712 |
| C | -1.57724 | -2.65514 | 0.668254 |
| H | -0.65348 | -3.08147 | 0.301025 |
| C | -2.4051  | -3.40851 | 1.495245 |
| H | -2.12896 | -4.42242 | 1.756334 |
| C | -3.58826 | -2.86035 | 1.980222 |
| H | -4.23661 | -3.44522 | 2.620014 |
| C | -3.94552 | -1.56173 | 1.633753 |
| H | -4.87058 | -1.13681 | 2.005249 |
| C | -3.11693 | -0.80259 | 0.811678 |
| C | -3.4488  | 0.627453 | 0.478624 |
| H | -4.52196 | 0.822518 | 0.575504 |
| H | -2.93473 | 1.295777 | 1.174221 |
| C | -3.85117 | 0.353112 | -1.90856 |
| H | -4.87143 | 0.742513 | -1.83937 |
| H | -3.87801 | -0.72516 | -1.76305 |
| H | -3.45442 | 0.568829 | -2.89898 |
| C | -2.98539 | 2.445391 | -1.05963 |
| H | -3.98148 | 2.855796 | -0.86606 |
| H | -2.70589 | 2.689213 | -2.08218 |
| H | -2.27245 | 2.897118 | -0.3734  |
| C | 0.067867 | 1.453007 | 0.182589 |
| C | 0.576326 | 2.554524 | -0.53968 |
| C | 1.190582 | 3.602425 | 0.145065 |
| H | 1.581298 | 4.44062  | -0.42089 |
| C | 1.325346 | 3.598271 | 1.52948  |
| C | 0.839694 | 2.496055 | 2.223586 |
| H | 0.957096 | 2.460819 | 3.301022 |
| C | 0.218108 | 1.421498 | 1.583538 |
| C | 0.51841  | 2.651839 | -2.04906 |
| H | -0.5012  | 2.614167 | -2.4333  |
| H | 1.072966 | 1.846006 | -2.53439 |
| H | 0.954484 | 3.591054 | -2.38673 |
| C | 1.962182 | 4.754148 | 2.251676 |
| H | 2.72905  | 5.231989 | 1.640689 |

|    |          |          |          |
|----|----------|----------|----------|
| H  | 2.415927 | 4.435949 | 3.190904 |
| H  | 1.214197 | 5.515457 | 2.490623 |
| C  | -0.22771 | 0.271101 | 2.451837 |
| H  | -1.30931 | 0.262992 | 2.591019 |
| H  | 0.228172 | 0.344584 | 3.438684 |
| H  | 0.043713 | -0.69131 | 2.024834 |
| C  | 3.237306 | -2.94535 | -0.67983 |
| C  | 2.752178 | -4.05331 | 0.260413 |
| H  | 3.046661 | -3.86371 | 1.293316 |
| H  | 3.184523 | -5.00808 | -0.03856 |
| H  | 1.666763 | -4.14969 | 0.228074 |
| C  | 3.243672 | -0.1149  | -1.44702 |
| C  | 2.963955 | -0.37563 | -2.93059 |
| H  | 3.441472 | -1.2937  | -3.27323 |
| H  | 3.355943 | 0.446314 | -3.52964 |
| H  | 1.895354 | -0.45716 | -3.13265 |
| C  | 2.972622 | -0.84344 | 1.362155 |
| C  | 4.470815 | -0.87042 | 1.680013 |
| H  | 4.891214 | -1.87087 | 1.57421  |
| H  | 4.629206 | -0.55355 | 2.710953 |
| H  | 5.035331 | -0.19409 | 1.037544 |
| N  | -2.98852 | 0.981055 | -0.88445 |
| O  | 0.991715 | -1.4149  | -0.46575 |
| Sb | -0.77993 | -0.14745 | -1.04302 |
| P  | 2.511566 | -1.32828 | -0.32005 |
| H  | 2.850768 | 0.856109 | -1.13412 |
| H  | 4.318243 | -0.0971  | -1.25353 |
| H  | 2.973608 | -3.17474 | -1.71445 |
| H  | 4.323997 | -2.83807 | -0.64276 |
| H  | 2.560701 | 0.157373 | 1.506606 |
| H  | 2.420122 | -1.50843 | 2.029393 |

## 2B

Sum of electronic and zero-point energies = -1609.665838 a.u.

|   |          |          |          |
|---|----------|----------|----------|
| C | 1.605227 | 1.594771 | -0.56963 |
| C | 3.977257 | 1.89061  | -0.95264 |
| H | 5.006556 | 1.656531 | -0.71239 |
| C | 2.924626 | 1.306925 | -0.25753 |
| C | 3.67674  | -0.91351 | 0.430635 |
| H | 3.148046 | -1.31639 | -0.42974 |
| H | 3.602105 | -1.62601 | 1.2515   |
| H | 4.732664 | -0.77859 | 0.175099 |
| C | 3.737115 | 0.933181 | 2.01642  |
| H | 4.792034 | 1.141564 | 1.811336 |



|    |          |          |          |
|----|----------|----------|----------|
| H  | 3.674121 | 0.225437 | 2.842298 |
| H  | 3.245432 | 1.860646 | 2.306084 |
| C  | 0.400893 | -1.49003 | 0.040236 |
| C  | 0.274514 | -1.78633 | -1.33032 |
| C  | 0.187332 | -3.12271 | -1.72447 |
| H  | 0.089225 | -3.34793 | -2.78082 |
| C  | 0.227657 | -4.17255 | -0.81281 |
| C  | 0.363433 | -3.85907 | 0.536156 |
| H  | 0.402116 | -4.66152 | 1.264454 |
| C  | 0.44615  | -2.54023 | 0.978471 |
| C  | 0.252208 | -0.73532 | -2.41145 |
| H  | -0.42726 | 0.080595 | -2.17555 |
| H  | -0.05367 | -1.17201 | -3.36179 |
| H  | 1.242086 | -0.29704 | -2.55043 |
| C  | 0.099101 | -5.60102 | -1.26781 |
| H  | -0.94885 | -5.91423 | -1.25902 |
| H  | 0.646802 | -6.27846 | -0.61148 |
| H  | 0.469984 | -5.72988 | -2.28528 |
| C  | 0.568723 | -2.29733 | 2.465909 |
| H  | 0.628467 | -3.2414  | 3.006012 |
| H  | -0.29341 | -1.75079 | 2.857484 |
| H  | 1.462435 | -1.72302 | 2.720085 |
| N  | 3.05881  | 0.360511 | 0.839469 |
| O  | -1.339   | 1.074892 | -0.20188 |
| Sb | 0.462593 | 0.513706 | 0.881575 |
| P  | -2.86464 | 1.057857 | -0.02885 |
| C  | -3.61403 | 0.722545 | -1.63856 |
| C  | -5.14449 | 0.646623 | -1.64717 |
| C  | -3.40939 | -0.20623 | 1.149252 |
| C  | -3.44588 | 2.666786 | 0.555534 |
| C  | -2.84174 | 3.098399 | 1.895961 |
| H  | -4.53581 | 2.627159 | 0.610981 |
| H  | -3.18984 | 3.378977 | -0.23324 |
| H  | -3.12132 | 2.419925 | 2.70268  |
| H  | -3.20454 | 4.092173 | 2.157832 |
| H  | -1.75347 | 3.142493 | 1.845338 |
| H  | -3.25297 | 1.507594 | -2.30724 |
| H  | -3.1699  | -0.21381 | -1.98434 |
| H  | -5.51592 | -0.13008 | -0.97805 |
| H  | -5.59753 | 1.593525 | -1.35324 |
| H  | -5.49173 | 0.410992 | -2.65291 |
| H  | -2.83211 | -0.04049 | 2.062508 |
| H  | -4.45138 | 0.012064 | 1.395337 |
| C  | -3.25228 | -1.65075 | 0.659872 |
| H  | -3.90184 | -1.85774 | -0.19063 |
| H  | -3.52609 | -2.3373  | 1.460773 |
| H  | -2.22691 | -1.87091 | 0.366702 |

|   |          |          |          |
|---|----------|----------|----------|
| C | 3.673855 | 2.787495 | -1.97327 |
| H | 4.476044 | 3.253715 | -2.53071 |
| C | 2.347706 | 3.092282 | -2.28334 |
| H | 2.13187  | 3.794588 | -3.07872 |
| C | 1.303384 | 2.498133 | -1.57993 |
| H | 0.273626 | 2.723921 | -1.82684 |

### 3A

Sum of electronic and zero-point  
energies = -1956.602365 a.u.

|   |          |          |          |
|---|----------|----------|----------|
| C | 2.006898 | -1.23481 | 0.415217 |
| C | 3.121584 | -0.53496 | 0.886596 |
| C | 4.006846 | -1.14876 | 1.76815  |
| H | 4.870218 | -0.60405 | 2.131805 |
| C | 3.78337  | -2.45717 | 2.183553 |
| H | 4.473507 | -2.92999 | 2.870596 |
| C | 2.680765 | -3.15869 | 1.706824 |
| H | 2.509058 | -4.18016 | 2.022315 |
| C | 1.797416 | -2.55093 | 0.819101 |
| H | 0.937288 | -3.10004 | 0.460623 |
| C | -0.22061 | 1.337054 | 0.076527 |
| C | -1.01761 | 2.468082 | 2.055719 |
| H | -1.1392  | 2.487098 | 3.133221 |
| C | -0.78642 | 2.334637 | -2.22044 |
| H | 0.215364 | 2.287704 | -2.65008 |
| H | -1.34376 | 1.469054 | -2.58602 |
| C | 0.048945 | 0.255024 | 2.396145 |
| H | -0.42825 | 0.369684 | 3.369026 |
| H | -0.22505 | -0.72043 | 1.998562 |
| H | 1.127219 | 0.24611  | 2.559499 |
| C | 3.302135 | 0.899779 | 0.469813 |
| H | 4.342179 | 1.223585 | 0.576961 |
| H | 2.690821 | 1.547435 | 1.103263 |
| C | 3.808402 | 0.504044 | -1.88343 |
| H | 3.933193 | -0.55477 | -1.66584 |
| H | 3.430209 | 0.617842 | -2.89753 |
| C | 2.703775 | 2.549831 | -1.21099 |
| H | 2.419813 | 2.691112 | -2.25135 |
| H | 1.937158 | 2.974874 | -0.5676  |
| H | 3.651153 | 3.067956 | -1.03557 |
| C | -3.3454  | -1.33158 | 0.516288 |
| C | -0.38016 | 1.369665 | 1.474713 |
| F | -3.13007 | -0.06445 | 0.883398 |
| F | -4.63607 | -1.46056 | 0.179947 |
| F | -3.10274 | -2.12317 | 1.570142 |

|    |          |          |          |
|----|----------|----------|----------|
| N  | 2.850582 | 1.107805 | -0.92889 |
| O  | -2.53262 | -0.80546 | -1.93482 |
| O  | -0.90381 | -1.69355 | -0.3325  |
| O  | -2.6378  | -3.16919 | -1.21754 |
| S  | -2.26354 | -1.80698 | -0.92744 |
| Sb | 0.800903 | -0.21822 | -1.05641 |
| H  | 4.781655 | 0.997221 | -1.80585 |
| C  | -0.78103 | 2.367166 | -0.70834 |
| C  | -1.41131 | 3.440508 | -0.08199 |
| H  | -1.8402  | 4.226555 | -0.69359 |
| C  | -1.52229 | 3.521435 | 1.302627 |
| H  | -1.26304 | 3.229255 | -2.61982 |
| C  | -2.17061 | 4.709897 | 1.959463 |
| H  | -2.98655 | 5.103931 | 1.351752 |
| H  | -2.565   | 4.455926 | 2.943926 |
| H  | -1.4457  | 5.518015 | 2.093992 |

### 3B

Sum of electronic and zero-point energies = -1917.288750 a.u.

|   |          |          |          |
|---|----------|----------|----------|
| C | 0.406315 | 1.983658 | 0.414246 |
| C | 1.583377 | 2.521703 | -0.08049 |
| C | 2.120949 | 3.696576 | 0.430235 |
| H | 3.044698 | 4.10813  | 0.044026 |
| C | 1.435377 | 4.334818 | 1.459944 |
| H | 1.831902 | 5.250825 | 1.878609 |
| C | 0.241772 | 3.807703 | 1.955095 |
| H | -0.27925 | 4.320668 | 2.753608 |
| C | -0.28276 | 2.628592 | 1.432916 |
| H | -1.2046  | 2.222006 | 1.82872  |
| C | 2.211333 | 2.459608 | -2.44365 |
| H | 1.228673 | 2.866267 | -2.67651 |
| C | 3.465226 | 1.145893 | -0.81906 |
| H | 4.231626 | 1.922749 | -0.73822 |
| H | 3.391345 | 0.613719 | 0.125836 |
| C | 1.321128 | -1.23388 | 0.059949 |
| C | 2.799418 | -3.10233 | -0.3689  |
| H | 3.283278 | -3.76738 | -1.07564 |
| C | 1.950072 | -2.10761 | -0.85006 |
| C | 0.948464 | -0.48227 | 2.490366 |
| H | 1.10426  | -0.90047 | 3.484457 |
| H | -0.12065 | -0.34473 | 2.343496 |
| H | 1.407929 | 0.507387 | 2.471431 |
| C | 1.752896 | -2.00981 | -2.34698 |
| H | 2.092492 | -1.05132 | -2.74761 |

|    |          |          |          |
|----|----------|----------|----------|
| H  | 0.704331 | -2.12857 | -2.62962 |
| C  | -3.92207 | -1.26522 | -0.34216 |
| N  | 2.154299 | 1.728825 | -1.16235 |
| O  | -1.62227 | -0.37398 | 0.502006 |
| O  | -3.20058 | 1.271033 | -0.3988  |
| O  | -3.59117 | 0.219915 | 1.809162 |
| F  | -5.22053 | -0.97258 | -0.46845 |
| F  | -3.80423 | -2.38747 | 0.374397 |
| F  | -3.41383 | -1.48464 | -1.56182 |
| S  | -3.02834 | 0.145223 | 0.486924 |
| Sb | 0.07007  | 0.286982 | -0.85491 |
| H  | 3.758822 | 0.441319 | -1.59609 |
| C  | 1.553998 | -1.38026 | 1.441206 |
| C  | 2.407997 | -2.3964  | 1.874061 |
| H  | 2.584568 | -2.50809 | 2.938278 |
| C  | 3.040195 | -3.26593 | 0.991592 |
| H  | 2.318049 | -2.7874  | -2.85945 |
| C  | 3.929432 | -4.37066 | 1.494829 |
| H  | 3.346364 | -5.27677 | 1.68296  |
| H  | 4.700722 | -4.62445 | 0.766493 |
| H  | 4.415253 | -4.09541 | 2.431805 |
| H  | 2.933305 | 3.280595 | -2.40171 |
| H  | 2.507453 | 1.770695 | -3.23373 |

#### 4A

Sum of electronic and zero-point energies = -1571.358986 a.u.

|    |          |          |          |
|----|----------|----------|----------|
| Sb | 1.377012 | -0.30648 | -1.06603 |
| O  | -0.67687 | 1.166309 | -1.16411 |
| N  | 3.463426 | -1.08195 | -0.20153 |
| C  | -0.8442  | -3.33156 | 1.201502 |
| H  | -1.1528  | -4.34425 | 0.96817  |
| C  | 0.307324 | -1.302   | 0.550519 |
| C  | 2.246141 | 1.453109 | -0.17766 |
| C  | -0.09416 | -0.70651 | 1.763766 |
| C  | 0.227944 | 0.713104 | 2.15927  |
| H  | 1.273283 | 0.828438 | 2.448564 |
| H  | -0.38134 | 1.014838 | 3.010138 |
| H  | 0.044248 | 1.415849 | 1.351536 |
| C  | -2.51932 | -0.30796 | -1.0239  |
| C  | -2.26175 | -1.05008 | -2.18052 |
| H  | -1.62688 | -0.63128 | -2.95037 |
| C  | -3.34093 | -0.84165 | -0.02691 |

|   |          |          |          |
|---|----------|----------|----------|
| H | -3.5218  | -0.28125 | 0.879583 |
| C | -0.85381 | -1.45489 | 2.663991 |
| H | -1.16529 | -0.98896 | 3.592115 |
| C | -0.08959 | -2.62768 | 0.265436 |
| C | -1.23908 | -2.76521 | 2.406679 |
| C | 0.253564 | -3.35015 | -1.01802 |
| H | -0.39896 | -4.21191 | -1.15019 |
| H | 1.27994  | -3.7211  | -1.01549 |
| H | 0.131891 | -2.72262 | -1.90054 |
| C | 3.700103 | -0.20519 | 0.980302 |
| H | 4.741485 | -0.2964  | 1.300628 |
| H | 3.072894 | -0.58576 | 1.78995  |
| C | 4.49033  | -0.83792 | -1.24636 |
| H | 4.269949 | -1.44818 | -2.11965 |
| H | 5.479752 | -1.10054 | -0.86457 |
| H | 4.488879 | 0.212157 | -1.52993 |
| C | 3.334783 | 1.218984 | 0.666622 |
| C | -2.10953 | -3.52629 | 3.367804 |
| H | -2.03848 | -3.12388 | 4.378518 |
| H | -1.84223 | -4.58364 | 3.395596 |
| H | -3.15759 | -3.46468 | 3.059934 |
| C | -2.8351  | -2.30149 | -2.34555 |
| H | -2.64819 | -2.86518 | -3.24998 |
| C | 3.498328 | -2.50348 | 0.208395 |
| H | 2.685909 | -2.70637 | 0.901966 |
| H | 4.451544 | -2.72653 | 0.69395  |
| H | 3.398736 | -3.13707 | -0.66912 |
| C | -3.88035 | -2.11038 | -0.17992 |
| H | -4.48666 | -2.53441 | 0.609409 |
| C | -3.63721 | -2.8365  | -1.34136 |
| H | -4.06859 | -3.82171 | -1.46249 |
| C | -1.86969 | 1.012329 | -0.8602  |
| C | -2.63585 | 2.162934 | -0.34116 |
| C | -1.94242 | 3.253987 | 0.202336 |
| C | -4.03444 | 2.208264 | -0.41388 |
| C | -2.63349 | 4.352444 | 0.683738 |
| H | -0.86379 | 3.225232 | 0.250409 |
| C | -4.72253 | 3.318571 | 0.055033 |
| H | -4.58076 | 1.387935 | -0.85668 |
| C | -4.02536 | 4.386779 | 0.610116 |
| H | -2.09219 | 5.183811 | 1.115734 |
| H | -5.80166 | 3.351416 | -0.01488 |
| H | -4.56443 | 5.248513 | 0.982298 |
| C | 1.880224 | 2.759646 | -0.48918 |
| H | 1.052994 | 2.94955  | -1.15899 |
| C | 2.56995  | 3.829218 | 0.074581 |
| H | 2.277372 | 4.843919 | -0.16396 |

|   |          |          |          |
|---|----------|----------|----------|
| C | 3.63806  | 3.59471  | 0.934466 |
| H | 4.177875 | 4.42587  | 1.369458 |
| C | 4.027948 | 2.290572 | 1.221013 |
| H | 4.872717 | 2.107474 | 1.874189 |

**4B**

Sum of electronic and zero-point  
energies = -1532.044861 a.u.

|    |          |          |          |
|----|----------|----------|----------|
| C  | -1.86146 | 1.024824 | -0.77143 |
| C  | -2.7392  | 2.078264 | -0.24936 |
| C  | -2.17106 | 3.219197 | 0.338789 |
| C  | -4.94123 | 2.999897 | 0.132513 |
| H  | -6.01648 | 2.923833 | 0.042499 |
| C  | -4.13487 | 1.980644 | -0.35126 |
| H  | -4.58471 | 1.121209 | -0.82686 |
| C  | -2.38821 | -0.32936 | -1.04287 |
| C  | -2.09196 | -0.94888 | -2.26141 |
| H  | -1.53777 | -0.4093  | -3.01829 |
| C  | -2.53839 | -2.23866 | -2.50801 |
| H  | -2.32671 | -2.70837 | -3.45935 |
| C  | -3.24675 | -2.92907 | -1.52867 |
| H  | -3.57499 | -3.94334 | -1.71466 |
| C  | -3.53161 | -2.31991 | -0.31067 |
| H  | -4.06687 | -2.86246 | 0.456914 |
| C  | -3.12481 | -1.01557 | -0.07309 |
| H  | -3.33645 | -0.54417 | 0.876386 |
| C  | 0.400693 | -1.26142 | 0.544191 |
| C  | 0.190286 | -2.62794 | 0.269091 |
| C  | -0.44942 | -3.42338 | 1.216921 |
| C  | -0.00815 | -0.72786 | 1.781082 |
| C  | 0.640988 | -3.28544 | -1.01501 |
| H  | 0.234017 | -2.78802 | -1.89694 |
| H  | 1.729695 | -3.29233 | -1.10933 |
| H  | 0.309098 | -4.32217 | -1.05077 |
| C  | 3.689393 | -1.42483 | 0.901113 |
| H  | 3.541437 | -2.45347 | 0.576076 |
| C  | 4.525265 | -0.82869 | -1.31077 |
| H  | 4.375046 | -1.85197 | -1.65163 |
| H  | 4.390264 | -0.14851 | -2.1496  |
| H  | 5.545071 | -0.72642 | -0.93071 |
| N  | 3.533146 | -0.52173 | -0.25794 |
| O  | -0.65791 | 1.286853 | -0.97894 |
| Sb | 1.231316 | -0.1178  | -1.10478 |
| C  | -4.36692 | 4.118551 | 0.728171 |
| H  | -4.99871 | 4.909793 | 1.110676 |
| C  | -2.98023 | 4.227008 | 0.830959 |
| H  | -2.53705 | 5.097721 | 1.295456 |
| C  | -0.89477 | -2.90798 | 2.428758 |
| C  | -0.65201 | -1.56428 | 2.693491 |

|   |          |          |          |
|---|----------|----------|----------|
| H | -0.97537 | -1.14858 | 3.641265 |
| H | -0.61761 | -4.47084 | 0.993885 |
| C | 0.233587 | 0.701278 | 2.197521 |
| H | 1.293977 | 0.883364 | 2.381601 |
| H | -0.08018 | 1.415076 | 1.440501 |
| H | -0.3069  | 0.928502 | 3.115407 |
| C | -1.64962 | -3.76899 | 3.403639 |
| H | -1.29517 | -4.80037 | 3.382595 |
| H | -1.56101 | -3.39254 | 4.423102 |
| H | -2.7138  | -3.78532 | 3.150051 |
| C | 2.294974 | 1.485908 | -0.16009 |
| C | 3.513711 | 0.889029 | 0.11814  |
| C | 4.566051 | 1.595038 | 0.684851 |
| H | 5.511916 | 1.118601 | 0.907938 |
| C | 4.366625 | 2.945036 | 0.960343 |
| H | 5.166697 | 3.522693 | 1.404568 |
| C | 3.150306 | 3.562226 | 0.663843 |
| H | 3.019904 | 4.615585 | 0.877163 |
| C | 2.105918 | 2.837072 | 0.096595 |
| H | 1.165808 | 3.320361 | -0.13352 |
| H | 4.689076 | -1.3277  | 1.332798 |
| H | 2.945785 | -1.18301 | 1.655718 |
| H | -1.09669 | 3.296967 | 0.413342 |

[(NMe<sub>2</sub>CH<sub>2</sub>C<sub>6</sub>H<sub>4</sub>)(mesityl)(PhCHO)Sb]<sup>+</sup>

Sum of electronic and zero-point energies = -1340.281551 a.u.

|    |          |          |          |
|----|----------|----------|----------|
| Sb | -0.9376  | 0.213319 | -1.02618 |
| O  | 0.330033 | -2.11658 | -0.99184 |
| N  | -2.37869 | 1.918156 | -0.32282 |
| C  | 2.622541 | 1.693038 | 1.049222 |
| H  | 3.40202  | 2.388705 | 0.758888 |
| C  | 0.506529 | 0.616843 | 0.553685 |
| C  | -2.52255 | -0.88044 | -0.07471 |
| C  | 0.616528 | -0.10823 | 1.764105 |
| C  | -0.40084 | -1.11308 | 2.24491  |
| H  | -1.37102 | -0.65384 | 2.433051 |
| H  | -0.06718 | -1.56896 | 3.175962 |
| H  | -0.56372 | -1.9112  | 1.52189  |
| C  | 2.679105 | -1.70934 | -0.82582 |
| C  | 2.788032 | -0.81974 | -1.90229 |
| H  | 1.943358 | -0.6782  | -2.56318 |
| C  | 3.774919 | -1.92339 | 0.0174   |
| H  | 3.685959 | -2.61583 | 0.845469 |
| C  | 1.735425 | 0.090992 | 2.567727 |
| H  | 1.819971 | -0.47356 | 3.489362 |
| C  | 1.520558 | 1.532571 | 0.20646  |



|   |          |          |          |
|---|----------|----------|----------|
| C | 2.758445 | 0.973184 | 2.224754 |
| C | 1.508834 | 2.399909 | -1.03124 |
| H | 2.499184 | 2.423587 | -1.48628 |
| H | 1.244616 | 3.427614 | -0.77282 |
| H | 0.811451 | 2.071642 | -1.80093 |
| C | -3.06019 | 1.3562   | 0.881628 |
| H | -3.9431  | 1.958023 | 1.110221 |
| H | -2.36543 | 1.459316 | 1.718418 |
| C | -3.36226 | 2.144729 | -1.41537 |
| H | -2.84319 | 2.495239 | -2.30462 |
| H | -4.09147 | 2.895287 | -1.10424 |
| H | -3.88279 | 1.216683 | -1.6416  |
| C | -3.40227 | -0.09352 | 0.673909 |
| C | 3.989896 | 1.096793 | 3.077388 |
| H | 3.762945 | 0.943187 | 4.133056 |
| H | 4.461295 | 2.072981 | 2.960958 |
| H | 4.72486  | 0.340216 | 2.786628 |
| C | 3.976491 | -0.14722 | -2.12214 |
| H | 4.068035 | 0.533103 | -2.95833 |
| C | -1.70138 | 3.192415 | 0.016472 |
| H | -0.93542 | 3.010659 | 0.766234 |
| H | -2.4313  | 3.903866 | 0.4084   |
| H | -1.24433 | 3.610461 | -0.877   |
| C | 4.95652  | -1.2279  | -0.1908  |
| H | 5.797987 | -1.37586 | 0.472585 |
| C | 5.056125 | -0.34272 | -1.26009 |
| H | 5.980645 | 0.194588 | -1.42826 |
| C | 1.431948 | -2.40572 | -0.53689 |
| C | -2.78097 | -2.23557 | -0.25706 |
| H | -2.1024  | -2.84853 | -0.83521 |
| C | -3.90325 | -2.81097 | 0.331569 |
| H | -4.1007  | -3.86673 | 0.196328 |
| C | -4.77347 | -2.0304  | 1.086376 |
| H | -5.64918 | -2.47749 | 1.538768 |
| C | -4.52833 | -0.67114 | 1.251997 |
| H | -5.21185 | -0.06239 | 1.831533 |
| H | 1.510622 | -3.25015 | 0.167181 |

[(NMe<sub>2</sub>C<sub>6</sub>H<sub>4</sub>)(mesityl)(PhCHO)Sb]<sup>+</sup>

Sum of electronic and zero-point energies = -1300.966403 a.u.

|   |          |          |          |
|---|----------|----------|----------|
| C | 1.204953 | -2.64646 | -0.76568 |
| C | 2.512856 | -2.03965 | -0.62243 |
| C | 2.848378 | -0.83005 | -1.24664 |
| H | 2.147163 | -0.36231 | -1.92066 |
| C | 4.082725 | -0.25424 | -1.01395 |
| H | 4.34207  | 0.680467 | -1.49151 |

|    |          |          |          |
|----|----------|----------|----------|
| C  | 4.988676 | -0.87583 | -0.15412 |
| H  | 5.949616 | -0.41492 | 0.034884 |
| C  | 4.673783 | -2.08879 | 0.453082 |
| H  | 5.386304 | -2.56948 | 1.109555 |
| C  | 3.444532 | -2.67958 | 0.207759 |
| H  | 3.188553 | -3.62335 | 0.673197 |
| C  | 0.471632 | 0.889365 | 0.116113 |
| C  | 1.141615 | 2.002593 | -0.43348 |
| C  | 2.217105 | 2.560184 | 0.253294 |
| C  | 0.883027 | 0.37483  | 1.362805 |
| C  | 0.754223 | 2.62451  | -1.75656 |
| H  | 0.900037 | 1.936299 | -2.59337 |
| H  | -0.28903 | 2.946793 | -1.7761  |
| H  | 1.362904 | 3.505172 | -1.95643 |
| C  | -2.42768 | 2.343036 | 0.836404 |
| H  | -1.99446 | 3.192441 | 0.310935 |
| C  | -3.82315 | 1.845348 | -1.10365 |
| H  | -3.3905  | 2.68935  | -1.63836 |
| H  | -4.09774 | 1.069479 | -1.81554 |
| H  | -4.72046 | 2.178146 | -0.57685 |
| N  | -2.82289 | 1.312959 | -0.14967 |
| O  | 0.17937  | -2.09728 | -1.17553 |
| Sb | -1.03167 | 0.015738 | -1.18195 |
| C  | 2.663446 | 2.0412   | 1.463837 |
| C  | 1.973407 | 0.961109 | 2.00376  |
| H  | 2.296079 | 0.555176 | 2.955719 |
| H  | 2.728579 | 3.413712 | -0.17686 |
| C  | 0.199288 | -0.76934 | 2.066415 |
| H  | -0.80822 | -0.49497 | 2.382927 |
| H  | 0.097334 | -1.65094 | 1.437131 |
| H  | 0.760207 | -1.05904 | 2.953672 |
| C  | 3.875426 | 2.604807 | 2.151573 |
| H  | 4.035078 | 3.650849 | 1.888818 |
| H  | 3.791361 | 2.527336 | 3.236194 |
| H  | 4.769618 | 2.049691 | 1.85316  |
| C  | -2.37346 | -0.98037 | 0.15696  |
| C  | -3.23747 | 0.054758 | 0.471468 |
| C  | -4.35264 | -0.13301 | 1.275302 |
| H  | -5.02023 | 0.682573 | 1.52082  |
| C  | -4.58666 | -1.41711 | 1.759859 |
| H  | -5.44564 | -1.5994  | 2.392279 |
| C  | -3.73157 | -2.4721  | 1.435446 |
| H  | -3.93915 | -3.46321 | 1.818291 |
| C  | -2.61824 | -2.26318 | 0.625875 |
| H  | -1.95562 | -3.08206 | 0.377574 |
| H  | -3.29736 | 2.67993  | 1.405385 |
| H  | -1.68748 | 1.932603 | 1.517668 |

|   |          |          |          |
|---|----------|----------|----------|
| H | 1.126361 | -3.69774 | -0.45178 |
|---|----------|----------|----------|

[(NMe<sub>2</sub>CH<sub>2</sub>C<sub>6</sub>H<sub>4</sub>)(mesityl)(PhC(O)OPh)Sb]<sup>+</sup>

Sum of electronic and zero-point energies = -1685.923516 a.u.

|    |          |          |          |
|----|----------|----------|----------|
| Sb | -1.92962 | -0.32352 | -0.92857 |
| O  | 0.558817 | -0.16148 | -1.69322 |
| N  | -3.79079 | -1.05941 | 0.312496 |
| C  | -1.19807 | 3.245427 | 1.507539 |
| H  | -1.54467 | 4.269298 | 1.428145 |
| C  | -1.23889 | 0.963173 | 0.691093 |
| C  | -1.37045 | -2.31817 | -0.352   |
| C  | -0.28368 | 0.61845  | 1.672253 |
| C  | 0.29204  | -0.76392 | 1.848291 |
| H  | -0.44032 | -1.46392 | 2.251244 |
| H  | 1.132575 | -0.73641 | 2.540035 |
| H  | 0.64276  | -1.18547 | 0.910469 |
| C  | 1.260107 | 2.101727 | -1.32828 |
| C  | 0.312264 | 2.685219 | -2.17131 |
| H  | -0.25822 | 2.06066  | -2.84577 |
| C  | 2.012076 | 2.899123 | -0.46268 |
| H  | 2.737263 | 2.440874 | 0.194214 |
| C  | 0.18227  | 1.606052 | 2.539338 |
| H  | 0.923836 | 1.335682 | 3.282458 |
| C  | -1.69542 | 2.298353 | 0.614277 |
| C  | -0.25262 | 2.924874 | 2.471883 |
| C  | -2.71897 | 2.785627 | -0.38601 |
| H  | -2.64128 | 3.864811 | -0.50919 |
| H  | -3.73613 | 2.570655 | -0.05233 |
| H  | -2.59712 | 2.343808 | -1.37466 |
| C  | -3.21884 | -2.02871 | 1.292619 |
| H  | -4.02576 | -2.62418 | 1.726839 |
| H  | -2.77455 | -1.44097 | 2.098938 |
| C  | -4.7078  | -1.75414 | -0.62971 |
| H  | -5.07326 | -1.04491 | -1.36909 |
| H  | -5.55496 | -2.16964 | -0.07986 |
| H  | -4.18141 | -2.5626  | -1.13232 |
| C  | -2.17278 | -2.88939 | 0.63959  |
| C  | 0.326307 | 3.981716 | 3.369993 |
| H  | 0.678113 | 3.55941  | 4.311695 |
| H  | -0.40254 | 4.762779 | 3.589376 |
| H  | 1.181568 | 4.46043  | 2.883732 |
| C  | 0.119788 | 4.05814  | -2.1509  |
| H  | -0.60903 | 4.510111 | -2.81038 |
| C  | -4.52294 | 0.015527 | 1.020972 |
| H  | -3.83427 | 0.574689 | 1.649894 |
| H  | -5.31006 | -0.41912 | 1.641131 |

|   |          |          |          |
|---|----------|----------|----------|
| H | -4.97804 | 0.681861 | 0.292652 |
| C | 1.799043 | 4.269215 | -0.43031 |
| H | 2.364892 | 4.885061 | 0.256052 |
| C | 0.857019 | 4.849508 | -1.27484 |
| H | 0.696132 | 5.91958  | -1.24906 |
| C | 1.434825 | 0.634767 | -1.35952 |
| C | -0.38362 | -3.07905 | -0.97203 |
| H | 0.227204 | -2.64816 | -1.75342 |
| C | -0.16911 | -4.39523 | -0.57346 |
| H | 0.604831 | -4.98294 | -1.05046 |
| C | -0.95353 | -4.95676 | 0.429134 |
| H | -0.79032 | -5.98185 | 0.735561 |
| C | -1.96216 | -4.20872 | 1.027752 |
| H | -2.5843  | -4.65222 | 1.795758 |
| O | 2.644597 | 0.242294 | -0.99535 |
| C | 2.93821  | -1.19299 | -1.00796 |
| H | 2.127294 | -1.71874 | -0.5105  |
| H | 2.971678 | -1.50912 | -2.05032 |
| C | 4.245163 | -1.3918  | -0.30845 |
| C | 4.273937 | -1.66067 | 1.059858 |
| C | 5.446705 | -1.2867  | -1.00872 |
| C | 5.486632 | -1.8191  | 1.720768 |
| H | 3.343843 | -1.7493  | 1.607883 |
| C | 6.660558 | -1.44395 | -0.35002 |
| H | 5.430441 | -1.08213 | -2.0726  |
| C | 6.681657 | -1.70942 | 1.016208 |
| H | 5.499313 | -2.03059 | 2.782318 |
| H | 7.588367 | -1.36286 | -0.90166 |
| H | 7.626666 | -1.83488 | 1.529204 |

[(NMe<sub>2</sub>C<sub>6</sub>H<sub>4</sub>)(mesityl)(PhC(O)OPh)Sb]<sup>+</sup>

Sum of electronic and zero-point energies = -1646.606768 a.u.

|   |          |          |          |
|---|----------|----------|----------|
| C | 1.455963 | 0.428606 | -1.30693 |
| C | 1.294741 | 1.894404 | -1.33301 |
| C | 0.42034  | 2.468635 | -2.25789 |
| H | -0.09839 | 1.840602 | -2.97005 |
| C | 0.241387 | 3.843689 | -2.27514 |
| H | -0.42618 | 4.290785 | -2.99949 |
| C | 0.913526 | 4.642994 | -1.35518 |
| H | 0.75908  | 5.714172 | -1.35806 |
| C | 1.783429 | 4.07038  | -0.43157 |
| H | 2.297861 | 4.693142 | 0.288009 |
| C | 1.989819 | 2.699253 | -0.42774 |
| H | 2.659543 | 2.245839 | 0.288952 |
| C | -1.25707 | 0.995025 | 0.652439 |
| C | -1.77752 | 2.30518  | 0.600645 |

|    |          |          |          |
|----|----------|----------|----------|
| C  | -1.36309 | 3.239902 | 1.545633 |
| C  | -0.36069 | 0.641606 | 1.678985 |
| C  | -2.7792  | 2.750901 | -0.44046 |
| H  | -2.3742  | 2.686788 | -1.45248 |
| H  | -3.69718 | 2.158788 | -0.41199 |
| H  | -3.06291 | 3.789481 | -0.27566 |
| C  | -3.95213 | -0.69368 | 1.562696 |
| H  | -4.41705 | 0.284223 | 1.449628 |
| C  | -4.90586 | -1.41428 | -0.56478 |
| H  | -5.37829 | -0.44021 | -0.68211 |
| H  | -4.6656  | -1.81926 | -1.54588 |
| H  | -5.60059 | -2.09028 | -0.06099 |
| N  | -3.66347 | -1.25118 | 0.223254 |
| O  | 0.551806 | -0.38187 | -1.54868 |
| Sb | -1.8131  | -0.26008 | -1.02891 |
| C  | -0.44622 | 2.922116 | 2.541825 |
| C  | 0.027598 | 1.616109 | 2.598588 |
| H  | 0.727835 | 1.343928 | 3.380269 |
| H  | -1.75783 | 4.248071 | 1.492989 |
| C  | 0.195581 | -0.74748 | 1.860365 |
| H  | -0.57797 | -1.44748 | 2.18156  |
| H  | 0.612225 | -1.14931 | 0.940748 |
| H  | 0.980627 | -0.75049 | 2.615138 |
| C  | 0.043131 | 3.97069  | 3.501503 |
| H  | -0.7456  | 4.681407 | 3.751908 |
| H  | 0.416638 | 3.526996 | 4.424667 |
| H  | 0.862948 | 4.53966  | 3.052946 |
| C  | -1.60831 | -2.26981 | -0.3166  |
| C  | -2.84682 | -2.46346 | 0.271928 |
| C  | -3.22087 | -3.68114 | 0.821743 |
| H  | -4.18761 | -3.82079 | 1.287508 |
| C  | -2.30364 | -4.72658 | 0.75459  |
| H  | -2.56125 | -5.6894  | 1.176072 |
| C  | -1.06069 | -4.55005 | 0.143991 |
| H  | -0.36824 | -5.38071 | 0.094279 |
| C  | -0.7046  | -3.31971 | -0.40201 |
| H  | 0.258335 | -3.18895 | -0.87776 |
| H  | -4.62938 | -1.35176 | 2.112733 |
| H  | -3.02595 | -0.582   | 2.119525 |
| O  | 2.671061 | 0.036992 | -0.99564 |
| C  | 2.951116 | -1.40374 | -0.90924 |
| H  | 2.155595 | -1.87168 | -0.33505 |
| H  | 2.934861 | -1.79727 | -1.9245  |
| C  | 4.283359 | -1.56151 | -0.25029 |
| C  | 4.371083 | -1.62667 | 1.140712 |
| C  | 5.449258 | -1.61968 | -1.01267 |
| C  | 5.60854  | -1.74518 | 1.761737 |

|   |          |          |          |
|---|----------|----------|----------|
| H | 3.467902 | -1.58634 | 1.737799 |
| C | 6.688108 | -1.73933 | -0.39317 |
| H | 5.386455 | -1.57278 | -2.09324 |
| C | 6.768792 | -1.80098 | 0.994657 |
| H | 5.668098 | -1.79774 | 2.841248 |
| H | 7.588428 | -1.78679 | -0.99213 |
| H | 7.73304  | -1.89651 | 1.477342 |

## 5. References

- [1] R. J. Errington in *Advanced Practical Inorganic and Metal Organic Chemistry*, Blackie Academic & Professional, London, **1997**.
- [2] W. F. Armarego, C. L. L. Chai in *Purification of Laboratory Chemicals*, Elsevier, United Kingdom, **2013**.
- [3] A. Hübner, T. Bernert, I. Sängler, E. Alig, M. Bolte, L. Fink, M. Wagner, H.-W. Lerner, *Dalton Trans.* **2010**, 39, 7528–7533.
- [4] D. W. Slocum, T. K. Reinscheld, C. B. White, M. D. Timmons, P. A. Shelton, M. G. Slocum, R. D. Sandlin, E. G. Holland, D. Kusmic, J. A. Jennings, K. C. Tekin, Q. Nguyen, S. J. Bush, J. M. Keller, P. E. Whitley, *Organometallics* **2013**, 32, 1674-1686.
- [5] M. Opris, A. Silvestru, C. Silvestru, H. J. Breunig, Enno Lork, *Dalton Trans.* **2003**, 22, 4367-4374.
- [6] I. Krossing, *Chem. Eur. J.* **2001**, 7, 490-502.
- [7] R. A.-Ostrowska, T. Klis, D. Krajewski, B. Lewandowski, J. Serwatowski, *Tetrahedron Lett.* **2003**, 44, 7329 –7331.
- [8] J. R. Ludwig, P. M. Zimmerman, J. B. Gianino, C. S. Schindler, *Nature* **2016**, 533, 374–379
- [9] Bruker APEX3 software package (version 2016.9-0): Bruker AXS, **2016**.
- [10] SAINT; part of Bruker APEX3 software package (version 2016.9-0): Bruker AXS, **2016**.
- [11] SADABS; part of Bruker APEX3 software package (version 2016.9-0): Bruker AXS, **2016**.
- [12] G. M. Sheldrick, *Acta Cryst.*, **2015**, C71, 3-8.
- [13] L. J. Farrugia, *J. Appl. Cryst.*, **2012**, 45, 849-854.
- [14] (a) A. D. Becke, *J. Chem. Phys.* **1993**, 98, 5648-5652. (b) C. Lee, W. Yang, R. G. Parr, *Phys. Rev. B* **1988**, 37, 785-789. (c) A. D. Becke, *Phys. Rev. A* **1988**, 38, 3098-3100.
- [15] S. Grimme, J. Antony, S. Ehrlich and H. Krieg, *J. Chem. Phys.* **2010**, 132, 154104.
- [16] M. J. Frisch, G. W. Trucks, H. B. Schlegel, G. E. Scuseria, M. A. Robb, J. R. Cheeseman, G. Scalmani, V. Barone, G. A. Petersson, H. Nakatsuji, X. Li, M. Caricato, A. V. Marenich, J. Bloino, B. G. Janesko, R. Gomperts, B. Mennucci, H. P. Hratchian, J. V. Ortiz, A. F. Izmaylov, J. L. Sonnenberg, D. Williams-Young, F. Ding, F. Lipparini, F. Egidi, J. Goings, B. Peng, A. Petrone, T. Henderson, D. Ranasinghe, V. G. Zakrzewski, J. Gao, N. Rega, G. Zheng, W. Liang, M. Hada, M. Ehara, K. Toyota, R. Fukuda, J. Hasegawa, M. Ishida, T. Nakajima, Y. Honda, O. Kitao, H. Nakai, T. Vreven, K. Throssell, J. A. Montgomery, Jr., J. E. Peralta, F. Ogliaro, M. J. Bearpark, J. J. Heyd, E. N. Brothers, K. N. Kudin, V. N. Staroverov, T. A. Keith, R. Kobayashi, J. Normand, K. Raghavachari, A. P. Rendell, J. C. Burant, S. S. Iyengar, J. Tomasi, M. Cossi, J. M. Millam, M. Klene, C. Adamo, R. Cammi, J. W. Ochterski, R. L. Martin, K. Morokuma, O. Farkas, J. B. Foresman, and D. J. Fox, Gaussian, Inc., Wallingford CT, **2016**.
- [17] F. Weigend, R. Ahlrichs, *Phys. Chem. Chem. Phys.* **2005**, 7, 3297-3305.
- [18] a) A. Chakrabarti, K. Hermann, R. Druzinic, *Phys. Rev. B* **1999**, 59, 583–590; b) C. Li, C. Koenigsmann, W. Ding, B. Rudshiteyn, K. R. Yang, K. P. Regan, S. J. Konezny, V. S. Batista, G. W.

Brudvig, C. A. Schmuttenmaer, J. H. Kim, *J. Am. Chem. Soc.* **2015**, 137, 1520–1529; c) C. Ge, G. Fang, X. Shen, Y. Chong, W. G. Wamer, X. Gao, Z. Chai, C. Chen, J. J. Yin, *ACS Nano* **2016**, 10, 10436–10445.

[19] a) J. P. Perdew, K. Burke, M. Ernzerhof, *J. Chem. Phys.* **1996**, 105, 9982-9985. b) C. Adamo, V. Barone, *J. Chem. Phys.* **1999**, 110, 6158-6170. c) J. P. Perdew, K. Burke, M. Ernzerhof, *Phys. Rev. Lett.*, **1997**, 78, 1396.

[20] E. D. Glendening, C. R. Landis, F. Weinhold, *J. Comput. Chem.* **2013**, 34, 1363– 1374.

[21] M. J. Frisch, G. W. Trucks, H. B. Schlegel, G. E. Scuseria, M. A. Robb, J. R. Cheeseman, G. Scalmani, V. Barone, B. Mennucci, G. A. Petersson, H. Nakatsuji, M. Caricato, X. Li, H. P. Hratchian, A. F. Izmaylov, J. Bloino, G. Zheng, J. L. Sonnenberg, M. Hada, M. Ehara, K. Toyota, R. Fukuda, J. Hasegawa, M. Ishida, T. Nakajima, Y. Honda, O. Kitao, H. Nakai, T. Vreven, J. A. Montgomery Jr., J. E. Peralta, F. Ogliaro, M. J. Bearpark, J. Heyd, E. N. Brothers, K. N. Kudin, V. N. Staroverov, R. Kobayashi, J. Normand, K. Raghavachari, A. P. Rendell, J. C. Burant, S. S. Iyengar, J. Tomasi, M. Cossi, N. Rega, N. J. Millam, M. Klene, J. E. Knox, J. B. Cross, V. Bakken, C. Adamo, J. Jaramillo, R. Gomperts, R. E. Stratmann, O. Yazyev, A. J. Austin, R. Cammi, C. Pomelli, J. W. Ochterski, R. L. Martin, K. Morokuma, V. G. Zakrzewski, G. A. Voth, P. Salvador, J. J. Dannenberg, S. Dapprich, A. D. Daniels, Ö. Farkas, J. B. Foresman, J. V. Ortiz, J. Cioslowski, D. J. Fox, Gaussian, Inc., Wallingford, CT, USA, **2009**.
